# Supplementary material for: A benchmark survey of the common plants of South Northumberland and Durham, United Kingdom
Source: Biodivers Data J. 2015 Dec 29;(3):e7318. doi: 10.3897/BDJ.3.e7318 (PMC4699291; doi:10.3897/BDJ.3.e7318)
Supplement: Supplementary material 5 — An XSL-FO version of the recording card for Durham [file biodiversity_data_journal-3-e7318-s005.fo]

<?xml version="1.0" encoding="UTF-8"?>
<fo:root xmlns:fo="http://www.w3.org/1999/XSL/Format">
<fo:layout-master-set>
<fo:simple-page-master master-name="A4"
 page-width="297mm" page-height="210mm"
 margin-top="8mm"   margin-bottom="10mm"
 margin-left="6mm"  margin-right="6mm">
  <fo:region-body   margin-top="6mm" margin-bottom="6mm" column-count="9" column-gap="0mm"/>
  <fo:region-before extent="5mm"/>
  <fo:region-after  extent="5mm"/>
  <fo:region-start  extent="0cm"/>
  <fo:region-end    extent="0mm"/>
</fo:simple-page-master>
</fo:layout-master-set>
<fo:page-sequence master-reference="A4">
<fo:static-content flow-name="xsl-region-before">
<fo:block text-align="start" font-size="8pt" font-family="serif" line-height="8pt">
Optimised for the Vice County of Durham (66)
</fo:block>
</fo:static-content>
<fo:static-content flow-name="xsl-region-after">
<fo:block text-align="start" font-size="6pt" font-family="serif" line-height="6pt">
Please cross through the species names only. */agg refers to aggregate species encompassing other taxa.  Version 3b, 2011
</fo:block>
<fo:block text-align="end" font-size="6pt" font-family="serif" line-height="6pt">
www.bsbi.org.uk
</fo:block>
</fo:static-content>
<fo:flow flow-name="xsl-region-body">
<fo:list-block>
<fo:list-item><fo:list-item-label><fo:block font-size="6pt" font-family="monospace" color="black" >3</fo:block></fo:list-item-label>
<fo:list-item-body start-indent="30pt"><fo:block font-size="6pt" font-family="monospace" color="black" font-weight="normal">Acer cam</fo:block></fo:list-item-body></fo:list-item>
<fo:list-item><fo:list-item-label><fo:block font-size="6pt" font-family="monospace" color="black" >4</fo:block></fo:list-item-label>
<fo:list-item-body start-indent="30pt"><fo:block font-size="6pt" font-family="monospace" color="black" text-indent="5pt" font-weight="normal">   pla</fo:block></fo:list-item-body></fo:list-item>
<fo:list-item><fo:list-item-label><fo:block font-size="6pt" font-family="monospace" color="black" >5</fo:block></fo:list-item-label>
<fo:list-item-body start-indent="30pt"><fo:block font-size="6pt" font-family="monospace" color="black" text-indent="5pt" font-weight="normal">   pse</fo:block></fo:list-item-body></fo:list-item>
<fo:list-item><fo:list-item-label><fo:block font-size="6pt" font-family="monospace" color="black" >7</fo:block></fo:list-item-label>
<fo:list-item-body start-indent="30pt"><fo:block font-size="6pt" font-family="monospace" color="black" font-weight="normal">Achil mil</fo:block></fo:list-item-body></fo:list-item>
<fo:list-item><fo:list-item-label><fo:block font-size="6pt" font-family="monospace" color="black" >9</fo:block></fo:list-item-label>
<fo:list-item-body start-indent="30pt"><fo:block font-size="6pt" font-family="monospace" color="black" text-indent="5pt" font-weight="normal">  pta</fo:block></fo:list-item-body></fo:list-item>
<fo:list-item><fo:list-item-label><fo:block font-size="6pt" font-family="monospace" color="black" >19</fo:block></fo:list-item-label>
<fo:list-item-body start-indent="30pt"><fo:block font-size="6pt" font-family="monospace" color="black" font-weight="normal">Adoxa mos</fo:block></fo:list-item-body></fo:list-item>
<fo:list-item><fo:list-item-label><fo:block font-size="6pt" font-family="monospace" color="black" >20</fo:block></fo:list-item-label>
<fo:list-item-body start-indent="30pt"><fo:block font-size="6pt" font-family="monospace" color="black" font-weight="normal">Aegop pod</fo:block></fo:list-item-body></fo:list-item>
<fo:list-item><fo:list-item-label><fo:block font-size="6pt" font-family="monospace" color="black" >2241</fo:block></fo:list-item-label>
<fo:list-item-body start-indent="30pt"><fo:block font-size="6pt" font-family="monospace" color="black" font-weight="normal">Aescu hip</fo:block></fo:list-item-body></fo:list-item>
<fo:list-item><fo:list-item-label><fo:block font-size="6pt" font-family="monospace" color="black" >21</fo:block></fo:list-item-label>
<fo:list-item-body start-indent="30pt"><fo:block font-size="6pt" font-family="monospace" color="black" font-weight="normal">Aethu cyn</fo:block></fo:list-item-body></fo:list-item>
<fo:list-item><fo:list-item-label><fo:block font-size="6pt" font-family="monospace" color="black" >22</fo:block></fo:list-item-label>
<fo:list-item-body start-indent="30pt"><fo:block font-size="6pt" font-family="monospace" color="black" font-weight="normal">Agrim eup</fo:block></fo:list-item-body></fo:list-item>
<fo:list-item><fo:list-item-label><fo:block font-size="6pt" font-family="monospace" color="black" >35.2</fo:block></fo:list-item-label>
<fo:list-item-body start-indent="30pt"><fo:block font-size="6pt" font-family="monospace" color="black" font-weight="normal">Agros can</fo:block></fo:list-item-body></fo:list-item>
<fo:list-item><fo:list-item-label><fo:block font-size="6pt" font-family="monospace" color="black" >35</fo:block></fo:list-item-label>
<fo:list-item-body start-indent="30pt"><fo:block font-size="6pt" font-family="monospace" color="black" text-indent="5pt" font-weight="normal">  *can</fo:block></fo:list-item-body></fo:list-item>
<fo:list-item><fo:list-item-label><fo:block font-size="6pt" font-family="monospace" color="black" >40</fo:block></fo:list-item-label>
<fo:list-item-body start-indent="30pt"><fo:block font-size="6pt" font-family="monospace" color="black" text-indent="5pt" font-weight="normal">  cap</fo:block></fo:list-item-body></fo:list-item>
<fo:list-item><fo:list-item-label><fo:block font-size="6pt" font-family="monospace" color="black" >39</fo:block></fo:list-item-label>
<fo:list-item-body start-indent="30pt"><fo:block font-size="6pt" font-family="monospace" color="black" text-indent="5pt" font-weight="normal">  sto</fo:block></fo:list-item-body></fo:list-item>
<fo:list-item><fo:list-item-label><fo:block font-size="6pt" font-family="monospace" color="black" >35.1</fo:block></fo:list-item-label>
<fo:list-item-body start-indent="30pt"><fo:block font-size="6pt" font-family="monospace" color="black" text-indent="5pt" font-weight="normal">  vin</fo:block></fo:list-item-body></fo:list-item>
<fo:list-item><fo:list-item-label><fo:block font-size="6pt" font-family="monospace" color="black" >42</fo:block></fo:list-item-label>
<fo:list-item-body start-indent="30pt"><fo:block font-size="6pt" font-family="monospace" color="black" font-weight="normal">Aira  pra</fo:block></fo:list-item-body></fo:list-item>
<fo:list-item><fo:list-item-label><fo:block font-size="6pt" font-family="monospace" color="black" >46</fo:block></fo:list-item-label>
<fo:list-item-body start-indent="30pt"><fo:block font-size="6pt" font-family="monospace" color="black" font-weight="normal">Ajuga rep</fo:block></fo:list-item-body></fo:list-item>
<fo:list-item><fo:list-item-label><fo:block font-size="6pt" font-family="monospace" color="black" >47</fo:block></fo:list-item-label>
<fo:list-item-body start-indent="30pt"><fo:block font-size="6pt" font-family="monospace" color="black" font-weight="normal">Alche acu</fo:block></fo:list-item-body></fo:list-item>
<fo:list-item><fo:list-item-label><fo:block font-size="6pt" font-family="monospace" color="black" >4480</fo:block></fo:list-item-label>
<fo:list-item-body start-indent="30pt"><fo:block font-size="6pt" font-family="monospace" color="black" text-indent="5pt" font-weight="normal">  fil</fo:block></fo:list-item-body></fo:list-item>
<fo:list-item><fo:list-item-label><fo:block font-size="6pt" font-family="monospace" color="black" >57</fo:block></fo:list-item-label>
<fo:list-item-body start-indent="30pt"><fo:block font-size="6pt" font-family="monospace" color="black" text-indent="5pt" font-weight="normal">  fil ves</fo:block></fo:list-item-body></fo:list-item>
<fo:list-item><fo:list-item-label><fo:block font-size="6pt" font-family="monospace" color="black" >51</fo:block></fo:list-item-label>
<fo:list-item-body start-indent="30pt"><fo:block font-size="6pt" font-family="monospace" color="black" text-indent="5pt" font-weight="normal">  glab</fo:block></fo:list-item-body></fo:list-item>
<fo:list-item><fo:list-item-label><fo:block font-size="6pt" font-family="monospace" color="black" >2255</fo:block></fo:list-item-label>
<fo:list-item-body start-indent="30pt"><fo:block font-size="6pt" font-family="monospace" color="black" text-indent="5pt" font-weight="normal">  mol</fo:block></fo:list-item-body></fo:list-item>
<fo:list-item><fo:list-item-label><fo:block font-size="6pt" font-family="monospace" color="black" >58</fo:block></fo:list-item-label>
<fo:list-item-body start-indent="30pt"><fo:block font-size="6pt" font-family="monospace" color="black" text-indent="5pt" font-weight="normal">  *vul</fo:block></fo:list-item-body></fo:list-item>
<fo:list-item><fo:list-item-label><fo:block font-size="6pt" font-family="monospace" color="black" >60</fo:block></fo:list-item-label>
<fo:list-item-body start-indent="30pt"><fo:block font-size="6pt" font-family="monospace" color="black" text-indent="5pt" font-weight="normal">  xan</fo:block></fo:list-item-body></fo:list-item>
<fo:list-item><fo:list-item-label><fo:block font-size="6pt" font-family="monospace" color="black" >63</fo:block></fo:list-item-label>
<fo:list-item-body start-indent="30pt"><fo:block font-size="6pt" font-family="monospace" color="black" font-weight="normal">Alism pla</fo:block></fo:list-item-body></fo:list-item>
<fo:list-item><fo:list-item-label><fo:block font-size="6pt" font-family="monospace" color="black" >64</fo:block></fo:list-item-label>
<fo:list-item-body start-indent="30pt"><fo:block font-size="6pt" font-family="monospace" color="black" font-weight="normal">Allia pet</fo:block></fo:list-item-body></fo:list-item>
<fo:list-item><fo:list-item-label><fo:block font-size="6pt" font-family="monospace" color="black" >75</fo:block></fo:list-item-label>
<fo:list-item-body start-indent="30pt"><fo:block font-size="6pt" font-family="monospace" color="black" font-weight="normal">Alliu urs</fo:block></fo:list-item-body></fo:list-item>
<fo:list-item><fo:list-item-label><fo:block font-size="6pt" font-family="monospace" color="black" >76</fo:block></fo:list-item-label>
<fo:list-item-body start-indent="30pt"><fo:block font-size="6pt" font-family="monospace" color="black" text-indent="5pt" font-weight="normal">  vin</fo:block></fo:list-item-body></fo:list-item>
<fo:list-item><fo:list-item-label><fo:block font-size="6pt" font-family="monospace" color="black" >2406</fo:block></fo:list-item-label>
<fo:list-item-body start-indent="30pt"><fo:block font-size="6pt" font-family="monospace" color="black" font-weight="normal">Alnus cor</fo:block></fo:list-item-body></fo:list-item>
<fo:list-item><fo:list-item-label><fo:block font-size="6pt" font-family="monospace" color="black" >77</fo:block></fo:list-item-label>
<fo:list-item-body start-indent="30pt"><fo:block font-size="6pt" font-family="monospace" color="black" text-indent="5pt" font-weight="normal">  glu</fo:block></fo:list-item-body></fo:list-item>
<fo:list-item><fo:list-item-label><fo:block font-size="6pt" font-family="monospace" color="black" >78</fo:block></fo:list-item-label>
<fo:list-item-body start-indent="30pt"><fo:block font-size="6pt" font-family="monospace" color="black" text-indent="5pt" font-weight="normal">  inc</fo:block></fo:list-item-body></fo:list-item>
<fo:list-item><fo:list-item-label><fo:block font-size="6pt" font-family="monospace" color="black" >82</fo:block></fo:list-item-label>
<fo:list-item-body start-indent="30pt"><fo:block font-size="6pt" font-family="monospace" color="black" font-weight="normal">Alope gen</fo:block></fo:list-item-body></fo:list-item>
<fo:list-item><fo:list-item-label><fo:block font-size="6pt" font-family="monospace" color="black" >85</fo:block></fo:list-item-label>
<fo:list-item-body start-indent="30pt"><fo:block font-size="6pt" font-family="monospace" color="black" text-indent="5pt" font-weight="normal">  pra</fo:block></fo:list-item-body></fo:list-item>
<fo:list-item><fo:list-item-label><fo:block font-size="6pt" font-family="monospace" color="black" >98</fo:block></fo:list-item-label>
<fo:list-item-body start-indent="30pt"><fo:block font-size="6pt" font-family="monospace" color="black" font-weight="normal">Anaca pyr</fo:block></fo:list-item-body></fo:list-item>
<fo:list-item><fo:list-item-label><fo:block font-size="6pt" font-family="monospace" color="black" >99</fo:block></fo:list-item-label>
<fo:list-item-body start-indent="30pt"><fo:block font-size="6pt" font-family="monospace" color="black" font-weight="normal">Anaga arv</fo:block></fo:list-item-body></fo:list-item>
<fo:list-item><fo:list-item-label><fo:block font-size="6pt" font-family="monospace" color="black" >105</fo:block></fo:list-item-label>
<fo:list-item-body start-indent="30pt"><fo:block font-size="6pt" font-family="monospace" color="black" font-weight="normal">Anemo nem</fo:block></fo:list-item-body></fo:list-item>
<fo:list-item><fo:list-item-label><fo:block font-size="6pt" font-family="monospace" color="black" >109</fo:block></fo:list-item-label>
<fo:list-item-body start-indent="30pt"><fo:block font-size="6pt" font-family="monospace" color="black" font-weight="normal">Angel syl</fo:block></fo:list-item-body></fo:list-item>
<fo:list-item><fo:list-item-label><fo:block font-size="6pt" font-family="monospace" color="black" >113</fo:block></fo:list-item-label>
<fo:list-item-body start-indent="30pt"><fo:block font-size="6pt" font-family="monospace" color="black" font-weight="normal">Anisa ste</fo:block></fo:list-item-body></fo:list-item>
<fo:list-item><fo:list-item-label><fo:block font-size="6pt" font-family="monospace" color="black" >121</fo:block></fo:list-item-label>
<fo:list-item-body start-indent="30pt"><fo:block font-size="6pt" font-family="monospace" color="black" font-weight="normal">Antho odo</fo:block></fo:list-item-body></fo:list-item>
<fo:list-item><fo:list-item-label><fo:block font-size="6pt" font-family="monospace" color="black" >125</fo:block></fo:list-item-label>
<fo:list-item-body start-indent="30pt"><fo:block font-size="6pt" font-family="monospace" color="black" font-weight="normal">Anthr syl</fo:block></fo:list-item-body></fo:list-item>
<fo:list-item><fo:list-item-label><fo:block font-size="6pt" font-family="monospace" color="black" >126</fo:block></fo:list-item-label>
<fo:list-item-body start-indent="30pt"><fo:block font-size="6pt" font-family="monospace" color="black" font-weight="normal">Anthy vul</fo:block></fo:list-item-body></fo:list-item>
<fo:list-item><fo:list-item-label><fo:block font-size="6pt" font-family="monospace" color="black" >131</fo:block></fo:list-item-label>
<fo:list-item-body start-indent="30pt"><fo:block font-size="6pt" font-family="monospace" color="black" font-weight="normal">Aphan*agg</fo:block></fo:list-item-body></fo:list-item>
<fo:list-item><fo:list-item-label><fo:block font-size="6pt" font-family="monospace" color="black" >137</fo:block></fo:list-item-label>
<fo:list-item-body start-indent="30pt"><fo:block font-size="6pt" font-family="monospace" color="black" font-weight="normal">Apium nod</fo:block></fo:list-item-body></fo:list-item>
<fo:list-item><fo:list-item-label><fo:block font-size="6pt" font-family="monospace" color="black" >141</fo:block></fo:list-item-label>
<fo:list-item-body start-indent="30pt"><fo:block font-size="6pt" font-family="monospace" color="black" font-weight="normal">Aquil vul</fo:block></fo:list-item-body></fo:list-item>
<fo:list-item><fo:list-item-label><fo:block font-size="6pt" font-family="monospace" color="black" >142</fo:block></fo:list-item-label>
<fo:list-item-body start-indent="30pt"><fo:block font-size="6pt" font-family="monospace" color="black" font-weight="normal">Arabid tha</fo:block></fo:list-item-body></fo:list-item>
<fo:list-item><fo:list-item-label><fo:block font-size="6pt" font-family="monospace" color="black" >150</fo:block></fo:list-item-label>
<fo:list-item-body start-indent="30pt"><fo:block font-size="6pt" font-family="monospace" color="black" font-weight="normal">Arcti*min</fo:block></fo:list-item-body></fo:list-item>
<fo:list-item><fo:list-item-label><fo:block font-size="6pt" font-family="monospace" color="black" >153</fo:block></fo:list-item-label>
<fo:list-item-body start-indent="30pt"><fo:block font-size="6pt" font-family="monospace" color="black" text-indent="5pt" font-weight="normal">  nem</fo:block></fo:list-item-body></fo:list-item>
<fo:list-item><fo:list-item-label><fo:block font-size="6pt" font-family="monospace" color="black" >162</fo:block></fo:list-item-label>
<fo:list-item-body start-indent="30pt"><fo:block font-size="6pt" font-family="monospace" color="black" font-weight="normal">Arena ser</fo:block></fo:list-item-body></fo:list-item>
<fo:list-item><fo:list-item-label><fo:block font-size="6pt" font-family="monospace" color="black" >166</fo:block></fo:list-item-label>
<fo:list-item-body start-indent="30pt"><fo:block font-size="6pt" font-family="monospace" color="black" font-weight="normal">Armer mar</fo:block></fo:list-item-body></fo:list-item>
<fo:list-item><fo:list-item-label><fo:block font-size="6pt" font-family="monospace" color="black" >167</fo:block></fo:list-item-label>
<fo:list-item-body start-indent="30pt"><fo:block font-size="6pt" font-family="monospace" color="black" font-weight="normal">Armor rus</fo:block></fo:list-item-body></fo:list-item>
<fo:list-item><fo:list-item-label><fo:block font-size="6pt" font-family="monospace" color="black" >169</fo:block></fo:list-item-label>
<fo:list-item-body start-indent="30pt"><fo:block font-size="6pt" font-family="monospace" color="black" font-weight="normal">Arrhe ela</fo:block></fo:list-item-body></fo:list-item>
<fo:list-item><fo:list-item-label><fo:block font-size="6pt" font-family="monospace" color="black" >175</fo:block></fo:list-item-label>
<fo:list-item-body start-indent="30pt"><fo:block font-size="6pt" font-family="monospace" color="black" font-weight="normal">Artem vul</fo:block></fo:list-item-body></fo:list-item>
<fo:list-item><fo:list-item-label><fo:block font-size="6pt" font-family="monospace" color="black" >176</fo:block></fo:list-item-label>
<fo:list-item-body start-indent="30pt"><fo:block font-size="6pt" font-family="monospace" color="black" font-weight="normal">Arum  mac</fo:block></fo:list-item-body></fo:list-item>
<fo:list-item><fo:list-item-label><fo:block font-size="6pt" font-family="monospace" color="black" >185.1</fo:block></fo:list-item-label>
<fo:list-item-body start-indent="30pt"><fo:block font-size="6pt" font-family="monospace" color="black" font-weight="normal">Asple adi</fo:block></fo:list-item-body></fo:list-item>
<fo:list-item><fo:list-item-label><fo:block font-size="6pt" font-family="monospace" color="black" >192</fo:block></fo:list-item-label>
<fo:list-item-body start-indent="30pt"><fo:block font-size="6pt" font-family="monospace" color="black" text-indent="5pt" font-weight="normal">  rut</fo:block></fo:list-item-body></fo:list-item>
<fo:list-item><fo:list-item-label><fo:block font-size="6pt" font-family="monospace" color="black" >1466</fo:block></fo:list-item-label>
<fo:list-item-body start-indent="30pt"><fo:block font-size="6pt" font-family="monospace" color="black" text-indent="5pt" font-weight="normal">  sco</fo:block></fo:list-item-body></fo:list-item>
<fo:list-item><fo:list-item-label><fo:block font-size="6pt" font-family="monospace" color="black" >194</fo:block></fo:list-item-label>
<fo:list-item-body start-indent="30pt"><fo:block font-size="6pt" font-family="monospace" color="black" text-indent="5pt" font-weight="normal">  tri</fo:block></fo:list-item-body></fo:list-item>
<fo:list-item><fo:list-item-label><fo:block font-size="6pt" font-family="monospace" color="black" >194.1</fo:block></fo:list-item-label>
<fo:list-item-body start-indent="30pt"><fo:block font-size="6pt" font-family="monospace" color="black" text-indent="5pt" font-weight="normal">  tri qua</fo:block></fo:list-item-body></fo:list-item>
<fo:list-item><fo:list-item-label><fo:block font-size="6pt" font-family="monospace" color="black" >4494</fo:block></fo:list-item-label>
<fo:list-item-body start-indent="30pt"><fo:block font-size="6pt" font-family="monospace" color="black" font-weight="normal">Aster novi</fo:block></fo:list-item-body></fo:list-item>
<fo:list-item><fo:list-item-label><fo:block font-size="6pt" font-family="monospace" color="black" >204</fo:block></fo:list-item-label>
<fo:list-item-body start-indent="30pt"><fo:block font-size="6pt" font-family="monospace" color="black" text-indent="5pt" font-weight="normal">  tri</fo:block></fo:list-item-body></fo:list-item>
<fo:list-item><fo:list-item-label><fo:block font-size="6pt" font-family="monospace" color="black" >211</fo:block></fo:list-item-label>
<fo:list-item-body start-indent="30pt"><fo:block font-size="6pt" font-family="monospace" color="black" font-weight="normal">Athyr fil</fo:block></fo:list-item-body></fo:list-item>
<fo:list-item><fo:list-item-label><fo:block font-size="6pt" font-family="monospace" color="black" >217</fo:block></fo:list-item-label>
<fo:list-item-body start-indent="30pt"><fo:block font-size="6pt" font-family="monospace" color="black" font-weight="normal">Atrip lit</fo:block></fo:list-item-body></fo:list-item>
<fo:list-item><fo:list-item-label><fo:block font-size="6pt" font-family="monospace" color="black" >218</fo:block></fo:list-item-label>
<fo:list-item-body start-indent="30pt"><fo:block font-size="6pt" font-family="monospace" color="black" text-indent="5pt" font-weight="normal">  pat</fo:block></fo:list-item-body></fo:list-item>
<fo:list-item><fo:list-item-label><fo:block font-size="6pt" font-family="monospace" color="black" >214</fo:block></fo:list-item-label>
<fo:list-item-body start-indent="30pt"><fo:block font-size="6pt" font-family="monospace" color="black" text-indent="5pt" font-weight="normal">  pro</fo:block></fo:list-item-body></fo:list-item>
<fo:list-item><fo:list-item-label><fo:block font-size="6pt" font-family="monospace" color="black" >220</fo:block></fo:list-item-label>
<fo:list-item-body start-indent="30pt"><fo:block font-size="6pt" font-family="monospace" color="black" font-weight="normal">Avena fat</fo:block></fo:list-item-body></fo:list-item>
<fo:list-item><fo:list-item-label><fo:block font-size="6pt" font-family="monospace" color="black" >961</fo:block></fo:list-item-label>
<fo:list-item-body start-indent="30pt"><fo:block font-size="6pt" font-family="monospace" color="black" font-weight="normal">Avenu pra</fo:block></fo:list-item-body></fo:list-item>
<fo:list-item><fo:list-item-label><fo:block font-size="6pt" font-family="monospace" color="black" >962</fo:block></fo:list-item-label>
<fo:list-item-body start-indent="30pt"><fo:block font-size="6pt" font-family="monospace" color="black" text-indent="5pt" font-weight="normal">  pub</fo:block></fo:list-item-body></fo:list-item>
<fo:list-item><fo:list-item-label><fo:block font-size="6pt" font-family="monospace" color="black" >225</fo:block></fo:list-item-label>
<fo:list-item-body start-indent="30pt"><fo:block font-size="6pt" font-family="monospace" color="black" font-weight="normal">Ballo nig</fo:block></fo:list-item-body></fo:list-item>
<fo:list-item><fo:list-item-label><fo:block font-size="6pt" font-family="monospace" color="black" >229</fo:block></fo:list-item-label>
<fo:list-item-body start-indent="30pt"><fo:block font-size="6pt" font-family="monospace" color="black" font-weight="normal">Barba vul</fo:block></fo:list-item-body></fo:list-item>
<fo:list-item><fo:list-item-label><fo:block font-size="6pt" font-family="monospace" color="black" >231</fo:block></fo:list-item-label>
<fo:list-item-body start-indent="30pt"><fo:block font-size="6pt" font-family="monospace" color="black" font-weight="normal">Belli per</fo:block></fo:list-item-body></fo:list-item>
<fo:list-item><fo:list-item-label><fo:block font-size="6pt" font-family="monospace" color="black" >237</fo:block></fo:list-item-label>
<fo:list-item-body start-indent="30pt"><fo:block font-size="6pt" font-family="monospace" color="black" font-weight="normal">Beton off</fo:block></fo:list-item-body></fo:list-item>
<fo:list-item><fo:list-item-label><fo:block font-size="6pt" font-family="monospace" color="black" >239</fo:block></fo:list-item-label>
<fo:list-item-body start-indent="30pt"><fo:block font-size="6pt" font-family="monospace" color="black" font-weight="normal">Betul pen</fo:block></fo:list-item-body></fo:list-item>
<fo:list-item><fo:list-item-label><fo:block font-size="6pt" font-family="monospace" color="black" >240</fo:block></fo:list-item-label>
<fo:list-item-body start-indent="30pt"><fo:block font-size="6pt" font-family="monospace" color="black" text-indent="5pt" font-weight="normal">  pub</fo:block></fo:list-item-body></fo:list-item>
<fo:list-item><fo:list-item-label><fo:block font-size="6pt" font-family="monospace" color="black" >243</fo:block></fo:list-item-label>
<fo:list-item-body start-indent="30pt"><fo:block font-size="6pt" font-family="monospace" color="black" font-weight="normal">Black per</fo:block></fo:list-item-body></fo:list-item>
<fo:list-item><fo:list-item-label><fo:block font-size="6pt" font-family="monospace" color="black" >244</fo:block></fo:list-item-label>
<fo:list-item-body start-indent="30pt"><fo:block font-size="6pt" font-family="monospace" color="black" font-weight="normal">Blech spi</fo:block></fo:list-item-body></fo:list-item>
<fo:list-item><fo:list-item-label><fo:block font-size="6pt" font-family="monospace" color="black" >1860</fo:block></fo:list-item-label>
<fo:list-item-body start-indent="30pt"><fo:block font-size="6pt" font-family="monospace" color="black" font-weight="normal">Bolbo mar</fo:block></fo:list-item-body></fo:list-item>
<fo:list-item><fo:list-item-label><fo:block font-size="6pt" font-family="monospace" color="black" >250</fo:block></fo:list-item-label>
<fo:list-item-body start-indent="30pt"><fo:block font-size="6pt" font-family="monospace" color="black" font-weight="normal">Brach syl</fo:block></fo:list-item-body></fo:list-item>
<fo:list-item><fo:list-item-label><fo:block font-size="6pt" font-family="monospace" color="black" >251</fo:block></fo:list-item-label>
<fo:list-item-body start-indent="30pt"><fo:block font-size="6pt" font-family="monospace" color="black" font-weight="normal">Brass nap</fo:block></fo:list-item-body></fo:list-item>
<fo:list-item><fo:list-item-label><fo:block font-size="6pt" font-family="monospace" color="black" >251.1</fo:block></fo:list-item-label>
<fo:list-item-body start-indent="30pt"><fo:block font-size="6pt" font-family="monospace" color="black" text-indent="5pt" font-weight="normal">  nap ole</fo:block></fo:list-item-body></fo:list-item>
<fo:list-item><fo:list-item-label><fo:block font-size="6pt" font-family="monospace" color="black" >256</fo:block></fo:list-item-label>
<fo:list-item-body start-indent="30pt"><fo:block font-size="6pt" font-family="monospace" color="black" font-weight="normal">Briza med</fo:block></fo:list-item-body></fo:list-item>
<fo:list-item><fo:list-item-label><fo:block font-size="6pt" font-family="monospace" color="black" >272</fo:block></fo:list-item-label>
<fo:list-item-body start-indent="30pt"><fo:block font-size="6pt" font-family="monospace" color="black" font-weight="normal">Bromo ram</fo:block></fo:list-item-body></fo:list-item>
<fo:list-item><fo:list-item-label><fo:block font-size="6pt" font-family="monospace" color="black" >269</fo:block></fo:list-item-label>
<fo:list-item-body start-indent="30pt"><fo:block font-size="6pt" font-family="monospace" color="black" font-weight="normal">Bromu hor</fo:block></fo:list-item-body></fo:list-item>
<fo:list-item><fo:list-item-label><fo:block font-size="6pt" font-family="monospace" color="black" >277</fo:block></fo:list-item-label>
<fo:list-item-body start-indent="30pt"><fo:block font-size="6pt" font-family="monospace" color="black" font-weight="normal">Buddl dav</fo:block></fo:list-item-body></fo:list-item>
<fo:list-item><fo:list-item-label><fo:block font-size="6pt" font-family="monospace" color="black" >2249</fo:block></fo:list-item-label>
<fo:list-item-body start-indent="30pt"><fo:block font-size="6pt" font-family="monospace" color="black" font-weight="normal">Calli*agg</fo:block></fo:list-item-body></fo:list-item>
<fo:list-item><fo:list-item-label><fo:block font-size="6pt" font-family="monospace" color="black" >307</fo:block></fo:list-item-label>
<fo:list-item-body start-indent="30pt"><fo:block font-size="6pt" font-family="monospace" color="black" text-indent="5pt" font-weight="normal">  *sta</fo:block></fo:list-item-body></fo:list-item>
<fo:list-item><fo:list-item-label><fo:block font-size="6pt" font-family="monospace" color="black" >309</fo:block></fo:list-item-label>
<fo:list-item-body start-indent="30pt"><fo:block font-size="6pt" font-family="monospace" color="black" font-weight="normal">Callu vul</fo:block></fo:list-item-body></fo:list-item>
<fo:list-item><fo:list-item-label><fo:block font-size="6pt" font-family="monospace" color="black" >310</fo:block></fo:list-item-label>
<fo:list-item-body start-indent="30pt"><fo:block font-size="6pt" font-family="monospace" color="black" font-weight="normal">Calth pal</fo:block></fo:list-item-body></fo:list-item>
<fo:list-item><fo:list-item-label><fo:block font-size="6pt" font-family="monospace" color="black" >311</fo:block></fo:list-item-label>
<fo:list-item-body start-indent="30pt"><fo:block font-size="6pt" font-family="monospace" color="black" font-weight="normal">Calys sep</fo:block></fo:list-item-body></fo:list-item>
<fo:list-item><fo:list-item-label><fo:block font-size="6pt" font-family="monospace" color="black" >311.2</fo:block></fo:list-item-label>
<fo:list-item-body start-indent="30pt"><fo:block font-size="6pt" font-family="monospace" color="black" text-indent="5pt" font-weight="normal">  sep sep</fo:block></fo:list-item-body></fo:list-item>
<fo:list-item><fo:list-item-label><fo:block font-size="6pt" font-family="monospace" color="black" >313</fo:block></fo:list-item-label>
<fo:list-item-body start-indent="30pt"><fo:block font-size="6pt" font-family="monospace" color="black" text-indent="5pt" font-weight="normal">  sil</fo:block></fo:list-item-body></fo:list-item>
<fo:list-item><fo:list-item-label><fo:block font-size="6pt" font-family="monospace" color="black" >316</fo:block></fo:list-item-label>
<fo:list-item-body start-indent="30pt"><fo:block font-size="6pt" font-family="monospace" color="black" font-weight="normal">Campa lat</fo:block></fo:list-item-body></fo:list-item>
<fo:list-item><fo:list-item-label><fo:block font-size="6pt" font-family="monospace" color="black" >322</fo:block></fo:list-item-label>
<fo:list-item-body start-indent="30pt"><fo:block font-size="6pt" font-family="monospace" color="black" text-indent="5pt" font-weight="normal">  rot</fo:block></fo:list-item-body></fo:list-item>
<fo:list-item><fo:list-item-label><fo:block font-size="6pt" font-family="monospace" color="black" >325</fo:block></fo:list-item-label>
<fo:list-item-body start-indent="30pt"><fo:block font-size="6pt" font-family="monospace" color="black" font-weight="normal">Capse bur</fo:block></fo:list-item-body></fo:list-item>
<fo:list-item><fo:list-item-label><fo:block font-size="6pt" font-family="monospace" color="black" >327</fo:block></fo:list-item-label>
<fo:list-item-body start-indent="30pt"><fo:block font-size="6pt" font-family="monospace" color="black" font-weight="normal">Carda ama</fo:block></fo:list-item-body></fo:list-item>
<fo:list-item><fo:list-item-label><fo:block font-size="6pt" font-family="monospace" color="black" >328</fo:block></fo:list-item-label>
<fo:list-item-body start-indent="30pt"><fo:block font-size="6pt" font-family="monospace" color="black" text-indent="5pt" font-weight="normal">  fle</fo:block></fo:list-item-body></fo:list-item>
<fo:list-item><fo:list-item-label><fo:block font-size="6pt" font-family="monospace" color="black" >329</fo:block></fo:list-item-label>
<fo:list-item-body start-indent="30pt"><fo:block font-size="6pt" font-family="monospace" color="black" text-indent="5pt" font-weight="normal">  hir</fo:block></fo:list-item-body></fo:list-item>
<fo:list-item><fo:list-item-label><fo:block font-size="6pt" font-family="monospace" color="black" >331</fo:block></fo:list-item-label>
<fo:list-item-body start-indent="30pt"><fo:block font-size="6pt" font-family="monospace" color="black" text-indent="5pt" font-weight="normal">  pra</fo:block></fo:list-item-body></fo:list-item>
<fo:list-item><fo:list-item-label><fo:block font-size="6pt" font-family="monospace" color="black" >335</fo:block></fo:list-item-label>
<fo:list-item-body start-indent="30pt"><fo:block font-size="6pt" font-family="monospace" color="black" font-weight="normal">Cardu cri</fo:block></fo:list-item-body></fo:list-item>
<fo:list-item><fo:list-item-label><fo:block font-size="6pt" font-family="monospace" color="black" >337</fo:block></fo:list-item-label>
<fo:list-item-body start-indent="30pt"><fo:block font-size="6pt" font-family="monospace" color="black" text-indent="5pt" font-weight="normal">  nut</fo:block></fo:list-item-body></fo:list-item>
<fo:list-item><fo:list-item-label><fo:block font-size="6pt" font-family="monospace" color="black" >341</fo:block></fo:list-item-label>
<fo:list-item-body start-indent="30pt"><fo:block font-size="6pt" font-family="monospace" color="black" font-weight="normal">Carex acuti</fo:block></fo:list-item-body></fo:list-item>
<fo:list-item><fo:list-item-label><fo:block font-size="6pt" font-family="monospace" color="black" >350</fo:block></fo:list-item-label>
<fo:list-item-body start-indent="30pt"><fo:block font-size="6pt" font-family="monospace" color="black" text-indent="5pt" font-weight="normal">  bin</fo:block></fo:list-item-body></fo:list-item>
<fo:list-item><fo:list-item-label><fo:block font-size="6pt" font-family="monospace" color="black" >355</fo:block></fo:list-item-label>
<fo:list-item-body start-indent="30pt"><fo:block font-size="6pt" font-family="monospace" color="black" text-indent="5pt" font-weight="normal">  car</fo:block></fo:list-item-body></fo:list-item>
<fo:list-item><fo:list-item-label><fo:block font-size="6pt" font-family="monospace" color="black" >361</fo:block></fo:list-item-label>
<fo:list-item-body start-indent="30pt"><fo:block font-size="6pt" font-family="monospace" color="black" text-indent="5pt" font-weight="normal">  demis</fo:block></fo:list-item-body></fo:list-item>
<fo:list-item><fo:list-item-label><fo:block font-size="6pt" font-family="monospace" color="black" >367</fo:block></fo:list-item-label>
<fo:list-item-body start-indent="30pt"><fo:block font-size="6pt" font-family="monospace" color="black" text-indent="5pt" font-weight="normal">  disti</fo:block></fo:list-item-body></fo:list-item>
<fo:list-item><fo:list-item-label><fo:block font-size="6pt" font-family="monospace" color="black" >370</fo:block></fo:list-item-label>
<fo:list-item-body start-indent="30pt"><fo:block font-size="6pt" font-family="monospace" color="black" text-indent="5pt" font-weight="normal">  ech</fo:block></fo:list-item-body></fo:list-item>
<fo:list-item><fo:list-item-label><fo:block font-size="6pt" font-family="monospace" color="black" >376</fo:block></fo:list-item-label>
<fo:list-item-body start-indent="30pt"><fo:block font-size="6pt" font-family="monospace" color="black" text-indent="5pt" font-weight="normal">  flac</fo:block></fo:list-item-body></fo:list-item>
<fo:list-item><fo:list-item-label><fo:block font-size="6pt" font-family="monospace" color="black" >381</fo:block></fo:list-item-label>
<fo:list-item-body start-indent="30pt"><fo:block font-size="6pt" font-family="monospace" color="black" text-indent="5pt" font-weight="normal">  hir</fo:block></fo:list-item-body></fo:list-item>
<fo:list-item><fo:list-item-label><fo:block font-size="6pt" font-family="monospace" color="black" >387</fo:block></fo:list-item-label>
<fo:list-item-body start-indent="30pt"><fo:block font-size="6pt" font-family="monospace" color="black" text-indent="5pt" font-weight="normal">  lepid</fo:block></fo:list-item-body></fo:list-item>
<fo:list-item><fo:list-item-label><fo:block font-size="6pt" font-family="monospace" color="black" >397</fo:block></fo:list-item-label>
<fo:list-item-body start-indent="30pt"><fo:block font-size="6pt" font-family="monospace" color="black" text-indent="5pt" font-weight="normal">  lepor</fo:block></fo:list-item-body></fo:list-item>
<fo:list-item><fo:list-item-label><fo:block font-size="6pt" font-family="monospace" color="black" >393</fo:block></fo:list-item-label>
<fo:list-item-body start-indent="30pt"><fo:block font-size="6pt" font-family="monospace" color="black" text-indent="5pt" font-weight="normal">  nig</fo:block></fo:list-item-body></fo:list-item>
<fo:list-item><fo:list-item-label><fo:block font-size="6pt" font-family="monospace" color="black" >396</fo:block></fo:list-item-label>
<fo:list-item-body start-indent="30pt"><fo:block font-size="6pt" font-family="monospace" color="black" text-indent="5pt" font-weight="normal">  otr</fo:block></fo:list-item-body></fo:list-item>
<fo:list-item><fo:list-item-label><fo:block font-size="6pt" font-family="monospace" color="black" >399</fo:block></fo:list-item-label>
<fo:list-item-body start-indent="30pt"><fo:block font-size="6pt" font-family="monospace" color="black" text-indent="5pt" font-weight="normal">  pal</fo:block></fo:list-item-body></fo:list-item>
<fo:list-item><fo:list-item-label><fo:block font-size="6pt" font-family="monospace" color="black" >400</fo:block></fo:list-item-label>
<fo:list-item-body start-indent="30pt"><fo:block font-size="6pt" font-family="monospace" color="black" text-indent="5pt" font-weight="normal">  panicea</fo:block></fo:list-item-body></fo:list-item>
<fo:list-item><fo:list-item-label><fo:block font-size="6pt" font-family="monospace" color="black" >401</fo:block></fo:list-item-label>
<fo:list-item-body start-indent="30pt"><fo:block font-size="6pt" font-family="monospace" color="black" text-indent="5pt" font-weight="normal">  panicula</fo:block></fo:list-item-body></fo:list-item>
<fo:list-item><fo:list-item-label><fo:block font-size="6pt" font-family="monospace" color="black" >404</fo:block></fo:list-item-label>
<fo:list-item-body start-indent="30pt"><fo:block font-size="6pt" font-family="monospace" color="black" text-indent="5pt" font-weight="normal">  pen</fo:block></fo:list-item-body></fo:list-item>
<fo:list-item><fo:list-item-label><fo:block font-size="6pt" font-family="monospace" color="black" >405</fo:block></fo:list-item-label>
<fo:list-item-body start-indent="30pt"><fo:block font-size="6pt" font-family="monospace" color="black" text-indent="5pt" font-weight="normal">  pil</fo:block></fo:list-item-body></fo:list-item>
<fo:list-item><fo:list-item-label><fo:block font-size="6pt" font-family="monospace" color="black" >408</fo:block></fo:list-item-label>
<fo:list-item-body start-indent="30pt"><fo:block font-size="6pt" font-family="monospace" color="black" text-indent="5pt" font-weight="normal">  pul</fo:block></fo:list-item-body></fo:list-item>
<fo:list-item><fo:list-item-label><fo:block font-size="6pt" font-family="monospace" color="black" >412</fo:block></fo:list-item-label>
<fo:list-item-body start-indent="30pt"><fo:block font-size="6pt" font-family="monospace" color="black" text-indent="5pt" font-weight="normal">  rem</fo:block></fo:list-item-body></fo:list-item>
<fo:list-item><fo:list-item-label><fo:block font-size="6pt" font-family="monospace" color="black" >413</fo:block></fo:list-item-label>
<fo:list-item-body start-indent="30pt"><fo:block font-size="6pt" font-family="monospace" color="black" text-indent="5pt" font-weight="normal">  rip</fo:block></fo:list-item-body></fo:list-item>
<fo:list-item><fo:list-item-label><fo:block font-size="6pt" font-family="monospace" color="black" >414</fo:block></fo:list-item-label>
<fo:list-item-body start-indent="30pt"><fo:block font-size="6pt" font-family="monospace" color="black" text-indent="5pt" font-weight="normal">  ros</fo:block></fo:list-item-body></fo:list-item>
<fo:list-item><fo:list-item-label><fo:block font-size="6pt" font-family="monospace" color="black" >421</fo:block></fo:list-item-label>
<fo:list-item-body start-indent="30pt"><fo:block font-size="6pt" font-family="monospace" color="black" text-indent="5pt" font-weight="normal">  syl</fo:block></fo:list-item-body></fo:list-item>
<fo:list-item><fo:list-item-label><fo:block font-size="6pt" font-family="monospace" color="black" >7117</fo:block></fo:list-item-label>
<fo:list-item-body start-indent="30pt"><fo:block font-size="6pt" font-family="monospace" color="black" text-indent="5pt" font-weight="normal">  *vir</fo:block></fo:list-item-body></fo:list-item>
<fo:list-item><fo:list-item-label><fo:block font-size="6pt" font-family="monospace" color="black" >427</fo:block></fo:list-item-label>
<fo:list-item-body start-indent="30pt"><fo:block font-size="6pt" font-family="monospace" color="black" font-weight="normal">Carli vul</fo:block></fo:list-item-body></fo:list-item>
<fo:list-item><fo:list-item-label><fo:block font-size="6pt" font-family="monospace" color="black" >428</fo:block></fo:list-item-label>
<fo:list-item-body start-indent="30pt"><fo:block font-size="6pt" font-family="monospace" color="black" font-weight="normal">Carpi bet</fo:block></fo:list-item-body></fo:list-item>
<fo:list-item><fo:list-item-label><fo:block font-size="6pt" font-family="monospace" color="black" >432</fo:block></fo:list-item-label>
<fo:list-item-body start-indent="30pt"><fo:block font-size="6pt" font-family="monospace" color="black" font-weight="normal">Casta sat</fo:block></fo:list-item-body></fo:list-item>
<fo:list-item><fo:list-item-label><fo:block font-size="6pt" font-family="monospace" color="black" >435</fo:block></fo:list-item-label>
<fo:list-item-body start-indent="30pt"><fo:block font-size="6pt" font-family="monospace" color="black" font-weight="normal">Catap rig</fo:block></fo:list-item-body></fo:list-item>
<fo:list-item><fo:list-item-label><fo:block font-size="6pt" font-family="monospace" color="black" >2422</fo:block></fo:list-item-label>
<fo:list-item-body start-indent="30pt"><fo:block font-size="6pt" font-family="monospace" color="black" font-weight="normal">Centa mon</fo:block></fo:list-item-body></fo:list-item>
<fo:list-item><fo:list-item-label><fo:block font-size="6pt" font-family="monospace" color="black" >444</fo:block></fo:list-item-label>
<fo:list-item-body start-indent="30pt"><fo:block font-size="6pt" font-family="monospace" color="black" text-indent="5pt" font-weight="normal">  nig</fo:block></fo:list-item-body></fo:list-item>
<fo:list-item><fo:list-item-label><fo:block font-size="6pt" font-family="monospace" color="black" >446</fo:block></fo:list-item-label>
<fo:list-item-body start-indent="30pt"><fo:block font-size="6pt" font-family="monospace" color="black" text-indent="5pt" font-weight="normal">  sca</fo:block></fo:list-item-body></fo:list-item>
<fo:list-item><fo:list-item-label><fo:block font-size="6pt" font-family="monospace" color="black" >5486</fo:block></fo:list-item-label>
<fo:list-item-body start-indent="30pt"><fo:block font-size="6pt" font-family="monospace" color="black" font-weight="normal">Centa ery</fo:block></fo:list-item-body></fo:list-item>
<fo:list-item><fo:list-item-label><fo:block font-size="6pt" font-family="monospace" color="black" >455</fo:block></fo:list-item-label>
<fo:list-item-body start-indent="30pt"><fo:block font-size="6pt" font-family="monospace" color="black" font-weight="normal">Centr rub</fo:block></fo:list-item-body></fo:list-item>
<fo:list-item><fo:list-item-label><fo:block font-size="6pt" font-family="monospace" color="black" >467</fo:block></fo:list-item-label>
<fo:list-item-body start-indent="30pt"><fo:block font-size="6pt" font-family="monospace" color="black" font-weight="normal">Ceras fon</fo:block></fo:list-item-body></fo:list-item>
<fo:list-item><fo:list-item-label><fo:block font-size="6pt" font-family="monospace" color="black" >466</fo:block></fo:list-item-label>
<fo:list-item-body start-indent="30pt"><fo:block font-size="6pt" font-family="monospace" color="black" text-indent="5pt" font-weight="normal">  glo</fo:block></fo:list-item-body></fo:list-item>
<fo:list-item><fo:list-item-label><fo:block font-size="6pt" font-family="monospace" color="black" >470</fo:block></fo:list-item-label>
<fo:list-item-body start-indent="30pt"><fo:block font-size="6pt" font-family="monospace" color="black" text-indent="5pt" font-weight="normal">  tom</fo:block></fo:list-item-body></fo:list-item>
<fo:list-item><fo:list-item-label><fo:block font-size="6pt" font-family="monospace" color="black" >555</fo:block></fo:list-item-label>
<fo:list-item-body start-indent="30pt"><fo:block font-size="6pt" font-family="monospace" color="black" font-weight="normal">Cerat cla</fo:block></fo:list-item-body></fo:list-item>
<fo:list-item><fo:list-item-label><fo:block font-size="6pt" font-family="monospace" color="black" >476</fo:block></fo:list-item-label>
<fo:list-item-body start-indent="30pt"><fo:block font-size="6pt" font-family="monospace" color="black" font-weight="normal">Chaer tem</fo:block></fo:list-item-body></fo:list-item>
<fo:list-item><fo:list-item-label><fo:block font-size="6pt" font-family="monospace" color="black" >477</fo:block></fo:list-item-label>
<fo:list-item-body start-indent="30pt"><fo:block font-size="6pt" font-family="monospace" color="black" font-weight="normal">Chame ang</fo:block></fo:list-item-body></fo:list-item>
<fo:list-item><fo:list-item-label><fo:block font-size="6pt" font-family="monospace" color="black" >480</fo:block></fo:list-item-label>
<fo:list-item-body start-indent="30pt"><fo:block font-size="6pt" font-family="monospace" color="black" font-weight="normal">Cheli maj</fo:block></fo:list-item-body></fo:list-item>
<fo:list-item><fo:list-item-label><fo:block font-size="6pt" font-family="monospace" color="black" >482</fo:block></fo:list-item-label>
<fo:list-item-body start-indent="30pt"><fo:block font-size="6pt" font-family="monospace" color="black" font-weight="normal">Cheno alb</fo:block></fo:list-item-body></fo:list-item>
<fo:list-item><fo:list-item-label><fo:block font-size="6pt" font-family="monospace" color="black" >484</fo:block></fo:list-item-label>
<fo:list-item-body start-indent="30pt"><fo:block font-size="6pt" font-family="monospace" color="black" text-indent="5pt" font-weight="normal">  bon</fo:block></fo:list-item-body></fo:list-item>
<fo:list-item><fo:list-item-label><fo:block font-size="6pt" font-family="monospace" color="black" >506</fo:block></fo:list-item-label>
<fo:list-item-body start-indent="30pt"><fo:block font-size="6pt" font-family="monospace" color="black" font-weight="normal">Chrys opp</fo:block></fo:list-item-body></fo:list-item>
<fo:list-item><fo:list-item-label><fo:block font-size="6pt" font-family="monospace" color="black" >513</fo:block></fo:list-item-label>
<fo:list-item-body start-indent="30pt"><fo:block font-size="6pt" font-family="monospace" color="black" font-weight="normal">Circa lut</fo:block></fo:list-item-body></fo:list-item>
<fo:list-item><fo:list-item-label><fo:block font-size="6pt" font-family="monospace" color="black" >515</fo:block></fo:list-item-label>
<fo:list-item-body start-indent="30pt"><fo:block font-size="6pt" font-family="monospace" color="black" font-weight="normal">Cirsi arv</fo:block></fo:list-item-body></fo:list-item>
<fo:list-item><fo:list-item-label><fo:block font-size="6pt" font-family="monospace" color="black" >518</fo:block></fo:list-item-label>
<fo:list-item-body start-indent="30pt"><fo:block font-size="6pt" font-family="monospace" color="black" text-indent="5pt" font-weight="normal">  het</fo:block></fo:list-item-body></fo:list-item>
<fo:list-item><fo:list-item-label><fo:block font-size="6pt" font-family="monospace" color="black" >520</fo:block></fo:list-item-label>
<fo:list-item-body start-indent="30pt"><fo:block font-size="6pt" font-family="monospace" color="black" text-indent="5pt" font-weight="normal">  pal</fo:block></fo:list-item-body></fo:list-item>
<fo:list-item><fo:list-item-label><fo:block font-size="6pt" font-family="monospace" color="black" >522</fo:block></fo:list-item-label>
<fo:list-item-body start-indent="30pt"><fo:block font-size="6pt" font-family="monospace" color="black" text-indent="5pt" font-weight="normal">  vul</fo:block></fo:list-item-body></fo:list-item>
<fo:list-item><fo:list-item-label><fo:block font-size="6pt" font-family="monospace" color="black" >533</fo:block></fo:list-item-label>
<fo:list-item-body start-indent="30pt"><fo:block font-size="6pt" font-family="monospace" color="black" font-weight="normal">Cochl dan</fo:block></fo:list-item-body></fo:list-item>
<fo:list-item><fo:list-item-label><fo:block font-size="6pt" font-family="monospace" color="black" >2547</fo:block></fo:list-item-label>
<fo:list-item-body start-indent="30pt"><fo:block font-size="6pt" font-family="monospace" color="black" text-indent="5pt" font-weight="normal">  *off</fo:block></fo:list-item-body></fo:list-item>
<fo:list-item><fo:list-item-label><fo:block font-size="6pt" font-family="monospace" color="black" >1592</fo:block></fo:list-item-label>
<fo:list-item-body start-indent="30pt"><fo:block font-size="6pt" font-family="monospace" color="black" font-weight="normal">Comar pal</fo:block></fo:list-item-body></fo:list-item>
<fo:list-item><fo:list-item-label><fo:block font-size="6pt" font-family="monospace" color="black" >540</fo:block></fo:list-item-label>
<fo:list-item-body start-indent="30pt"><fo:block font-size="6pt" font-family="monospace" color="black" font-weight="normal">Coniu mac</fo:block></fo:list-item-body></fo:list-item>
<fo:list-item><fo:list-item-label><fo:block font-size="6pt" font-family="monospace" color="black" >541</fo:block></fo:list-item-label>
<fo:list-item-body start-indent="30pt"><fo:block font-size="6pt" font-family="monospace" color="black" font-weight="normal">Conop maj</fo:block></fo:list-item-body></fo:list-item>
<fo:list-item><fo:list-item-label><fo:block font-size="6pt" font-family="monospace" color="black" >544</fo:block></fo:list-item-label>
<fo:list-item-body start-indent="30pt"><fo:block font-size="6pt" font-family="monospace" color="black" font-weight="normal">Convo arv</fo:block></fo:list-item-body></fo:list-item>
<fo:list-item><fo:list-item-label><fo:block font-size="6pt" font-family="monospace" color="black" >548</fo:block></fo:list-item-label>
<fo:list-item-body start-indent="30pt"><fo:block font-size="6pt" font-family="monospace" color="black" font-weight="normal">Cornu san</fo:block></fo:list-item-body></fo:list-item>
<fo:list-item><fo:list-item-label><fo:block font-size="6pt" font-family="monospace" color="black" >557</fo:block></fo:list-item-label>
<fo:list-item-body start-indent="30pt"><fo:block font-size="6pt" font-family="monospace" color="black" font-weight="normal">Coryl ave</fo:block></fo:list-item-body></fo:list-item>
<fo:list-item><fo:list-item-label><fo:block font-size="6pt" font-family="monospace" color="black" >560</fo:block></fo:list-item-label>
<fo:list-item-body start-indent="30pt"><fo:block font-size="6pt" font-family="monospace" color="black" font-weight="normal">Coton hor</fo:block></fo:list-item-body></fo:list-item>
<fo:list-item><fo:list-item-label><fo:block font-size="6pt" font-family="monospace" color="black" >563</fo:block></fo:list-item-label>
<fo:list-item-body start-indent="30pt"><fo:block font-size="6pt" font-family="monospace" color="black" text-indent="5pt" font-weight="normal">  sim</fo:block></fo:list-item-body></fo:list-item>
<fo:list-item><fo:list-item-label><fo:block font-size="6pt" font-family="monospace" color="black" >4526</fo:block></fo:list-item-label>
<fo:list-item-body start-indent="30pt"><fo:block font-size="6pt" font-family="monospace" color="black" text-indent="5pt" font-weight="normal">  *agg</fo:block></fo:list-item-body></fo:list-item>
<fo:list-item><fo:list-item-label><fo:block font-size="6pt" font-family="monospace" color="black" >2423</fo:block></fo:list-item-label>
<fo:list-item-body start-indent="30pt"><fo:block font-size="6pt" font-family="monospace" color="black" font-weight="normal">Crass hel</fo:block></fo:list-item-body></fo:list-item>
<fo:list-item><fo:list-item-label><fo:block font-size="6pt" font-family="monospace" color="black" >569</fo:block></fo:list-item-label>
<fo:list-item-body start-indent="30pt"><fo:block font-size="6pt" font-family="monospace" color="black" font-weight="normal">Crata mon</fo:block></fo:list-item-body></fo:list-item>
<fo:list-item><fo:list-item-label><fo:block font-size="6pt" font-family="monospace" color="black" >572</fo:block></fo:list-item-label>
<fo:list-item-body start-indent="30pt"><fo:block font-size="6pt" font-family="monospace" color="black" font-weight="normal">Crepi cap</fo:block></fo:list-item-body></fo:list-item>
<fo:list-item><fo:list-item-label><fo:block font-size="6pt" font-family="monospace" color="black" >576</fo:block></fo:list-item-label>
<fo:list-item-body start-indent="30pt"><fo:block font-size="6pt" font-family="monospace" color="black" text-indent="5pt" font-weight="normal">  pal</fo:block></fo:list-item-body></fo:list-item>
<fo:list-item><fo:list-item-label><fo:block font-size="6pt" font-family="monospace" color="black" >580</fo:block></fo:list-item-label>
<fo:list-item-body start-indent="30pt"><fo:block font-size="6pt" font-family="monospace" color="black" font-weight="normal">Croco x cro</fo:block></fo:list-item-body></fo:list-item>
<fo:list-item><fo:list-item-label><fo:block font-size="6pt" font-family="monospace" color="black" >875</fo:block></fo:list-item-label>
<fo:list-item-body start-indent="30pt"><fo:block font-size="6pt" font-family="monospace" color="black" font-weight="normal">Cruci lae</fo:block></fo:list-item-body></fo:list-item>
<fo:list-item><fo:list-item-label><fo:block font-size="6pt" font-family="monospace" color="black" >592</fo:block></fo:list-item-label>
<fo:list-item-body start-indent="30pt"><fo:block font-size="6pt" font-family="monospace" color="black" font-weight="normal">Cymba mur</fo:block></fo:list-item-body></fo:list-item>
<fo:list-item><fo:list-item-label><fo:block font-size="6pt" font-family="monospace" color="black" >597</fo:block></fo:list-item-label>
<fo:list-item-body start-indent="30pt"><fo:block font-size="6pt" font-family="monospace" color="black" font-weight="normal">Cynos cri</fo:block></fo:list-item-body></fo:list-item>
<fo:list-item><fo:list-item-label><fo:block font-size="6pt" font-family="monospace" color="black" >603</fo:block></fo:list-item-label>
<fo:list-item-body start-indent="30pt"><fo:block font-size="6pt" font-family="monospace" color="black" font-weight="normal">Cysto fra</fo:block></fo:list-item-body></fo:list-item>
<fo:list-item><fo:list-item-label><fo:block font-size="6pt" font-family="monospace" color="black" >1822</fo:block></fo:list-item-label>
<fo:list-item-body start-indent="30pt"><fo:block font-size="6pt" font-family="monospace" color="black" font-weight="normal">Cytis sco</fo:block></fo:list-item-body></fo:list-item>
<fo:list-item><fo:list-item-label><fo:block font-size="6pt" font-family="monospace" color="black" >607</fo:block></fo:list-item-label>
<fo:list-item-body start-indent="30pt"><fo:block font-size="6pt" font-family="monospace" color="black" font-weight="normal">Dacty glo</fo:block></fo:list-item-body></fo:list-item>
<fo:list-item><fo:list-item-label><fo:block font-size="6pt" font-family="monospace" color="black" >608</fo:block></fo:list-item-label>
<fo:list-item-body start-indent="30pt"><fo:block font-size="6pt" font-family="monospace" color="black" font-weight="normal">Dacty fuc</fo:block></fo:list-item-body></fo:list-item>
<fo:list-item><fo:list-item-label><fo:block font-size="6pt" font-family="monospace" color="black" >613</fo:block></fo:list-item-label>
<fo:list-item-body start-indent="30pt"><fo:block font-size="6pt" font-family="monospace" color="black" text-indent="5pt" font-weight="normal">  pur</fo:block></fo:list-item-body></fo:list-item>
<fo:list-item><fo:list-item-label><fo:block font-size="6pt" font-family="monospace" color="black" >2863</fo:block></fo:list-item-label>
<fo:list-item-body start-indent="30pt"><fo:block font-size="6pt" font-family="monospace" color="black" text-indent="5pt" font-weight="normal">  x ven</fo:block></fo:list-item-body></fo:list-item>
<fo:list-item><fo:list-item-label><fo:block font-size="6pt" font-family="monospace" color="black" >1915</fo:block></fo:list-item-label>
<fo:list-item-body start-indent="30pt"><fo:block font-size="6pt" font-family="monospace" color="black" font-weight="normal">Danth dec</fo:block></fo:list-item-body></fo:list-item>
<fo:list-item><fo:list-item-label><fo:block font-size="6pt" font-family="monospace" color="black" >5474</fo:block></fo:list-item-label>
<fo:list-item-body start-indent="30pt"><fo:block font-size="6pt" font-family="monospace" color="black" font-weight="normal">Daucu car</fo:block></fo:list-item-body></fo:list-item>
<fo:list-item><fo:list-item-label><fo:block font-size="6pt" font-family="monospace" color="black" >620</fo:block></fo:list-item-label>
<fo:list-item-body start-indent="30pt"><fo:block font-size="6pt" font-family="monospace" color="black" text-indent="5pt" font-weight="normal">  car car</fo:block></fo:list-item-body></fo:list-item>
<fo:list-item><fo:list-item-label><fo:block font-size="6pt" font-family="monospace" color="black" >627</fo:block></fo:list-item-label>
<fo:list-item-body start-indent="30pt"><fo:block font-size="6pt" font-family="monospace" color="black" font-weight="normal">Desch ces</fo:block></fo:list-item-body></fo:list-item>
<fo:list-item><fo:list-item-label><fo:block font-size="6pt" font-family="monospace" color="black" >627.1</fo:block></fo:list-item-label>
<fo:list-item-body start-indent="30pt"><fo:block font-size="6pt" font-family="monospace" color="black" text-indent="5pt" font-weight="normal">  ces ces</fo:block></fo:list-item-body></fo:list-item>
<fo:list-item><fo:list-item-label><fo:block font-size="6pt" font-family="monospace" color="black" >628</fo:block></fo:list-item-label>
<fo:list-item-body start-indent="30pt"><fo:block font-size="6pt" font-family="monospace" color="black" text-indent="5pt" font-weight="normal">  fle</fo:block></fo:list-item-body></fo:list-item>
<fo:list-item><fo:list-item-label><fo:block font-size="6pt" font-family="monospace" color="black" >640</fo:block></fo:list-item-label>
<fo:list-item-body start-indent="30pt"><fo:block font-size="6pt" font-family="monospace" color="black" font-weight="normal">Digit pur</fo:block></fo:list-item-body></fo:list-item>
<fo:list-item><fo:list-item-label><fo:block font-size="6pt" font-family="monospace" color="black" >645</fo:block></fo:list-item-label>
<fo:list-item-body start-indent="30pt"><fo:block font-size="6pt" font-family="monospace" color="black" font-weight="normal">Diplo tenuif</fo:block></fo:list-item-body></fo:list-item>
<fo:list-item><fo:list-item-label><fo:block font-size="6pt" font-family="monospace" color="black" >646</fo:block></fo:list-item-label>
<fo:list-item-body start-indent="30pt"><fo:block font-size="6pt" font-family="monospace" color="black" font-weight="normal">Dipsa*ful</fo:block></fo:list-item-body></fo:list-item>
<fo:list-item><fo:list-item-label><fo:block font-size="6pt" font-family="monospace" color="black" >648</fo:block></fo:list-item-label>
<fo:list-item-body start-indent="30pt"><fo:block font-size="6pt" font-family="monospace" color="black" font-weight="normal">Doron par</fo:block></fo:list-item-body></fo:list-item>
<fo:list-item><fo:list-item-label><fo:block font-size="6pt" font-family="monospace" color="black" >662.1</fo:block></fo:list-item-label>
<fo:list-item-body start-indent="30pt"><fo:block font-size="6pt" font-family="monospace" color="black" font-weight="normal">Dryop aff</fo:block></fo:list-item-body></fo:list-item>
<fo:list-item><fo:list-item-label><fo:block font-size="6pt" font-family="monospace" color="black" >662</fo:block></fo:list-item-label>
<fo:list-item-body start-indent="30pt"><fo:block font-size="6pt" font-family="monospace" color="black" text-indent="5pt" font-weight="normal">  *aff</fo:block></fo:list-item-body></fo:list-item>
<fo:list-item><fo:list-item-label><fo:block font-size="6pt" font-family="monospace" color="black" >662.2</fo:block></fo:list-item-label>
<fo:list-item-body start-indent="30pt"><fo:block font-size="6pt" font-family="monospace" color="black" text-indent="5pt" font-weight="normal">  bor</fo:block></fo:list-item-body></fo:list-item>
<fo:list-item><fo:list-item-label><fo:block font-size="6pt" font-family="monospace" color="black" >662.3</fo:block></fo:list-item-label>
<fo:list-item-body start-indent="30pt"><fo:block font-size="6pt" font-family="monospace" color="black" text-indent="5pt" font-weight="normal">  cam</fo:block></fo:list-item-body></fo:list-item>
<fo:list-item><fo:list-item-label><fo:block font-size="6pt" font-family="monospace" color="black" >666</fo:block></fo:list-item-label>
<fo:list-item-body start-indent="30pt"><fo:block font-size="6pt" font-family="monospace" color="black" text-indent="5pt" font-weight="normal">  car</fo:block></fo:list-item-body></fo:list-item>
<fo:list-item><fo:list-item-label><fo:block font-size="6pt" font-family="monospace" color="black" >661</fo:block></fo:list-item-label>
<fo:list-item-body start-indent="30pt"><fo:block font-size="6pt" font-family="monospace" color="black" text-indent="5pt" font-weight="normal">  dil</fo:block></fo:list-item-body></fo:list-item>
<fo:list-item><fo:list-item-label><fo:block font-size="6pt" font-family="monospace" color="black" >665</fo:block></fo:list-item-label>
<fo:list-item-body start-indent="30pt"><fo:block font-size="6pt" font-family="monospace" color="black" text-indent="5pt" font-weight="normal">  fil</fo:block></fo:list-item-body></fo:list-item>
<fo:list-item><fo:list-item-label><fo:block font-size="6pt" font-family="monospace" color="black" >670</fo:block></fo:list-item-label>
<fo:list-item-body start-indent="30pt"><fo:block font-size="6pt" font-family="monospace" color="black" font-weight="normal">Echiu vul</fo:block></fo:list-item-body></fo:list-item>
<fo:list-item><fo:list-item-label><fo:block font-size="6pt" font-family="monospace" color="black" >675</fo:block></fo:list-item-label>
<fo:list-item-body start-indent="30pt"><fo:block font-size="6pt" font-family="monospace" color="black" font-weight="normal">Eleoc pal</fo:block></fo:list-item-body></fo:list-item>
<fo:list-item><fo:list-item-label><fo:block font-size="6pt" font-family="monospace" color="black" >681</fo:block></fo:list-item-label>
<fo:list-item-body start-indent="30pt"><fo:block font-size="6pt" font-family="monospace" color="black" font-weight="normal">Elode can</fo:block></fo:list-item-body></fo:list-item>
<fo:list-item><fo:list-item-label><fo:block font-size="6pt" font-family="monospace" color="black" >7006</fo:block></fo:list-item-label>
<fo:list-item-body start-indent="30pt"><fo:block font-size="6pt" font-family="monospace" color="black" font-weight="normal">Elymu can</fo:block></fo:list-item-body></fo:list-item>
<fo:list-item><fo:list-item-label><fo:block font-size="6pt" font-family="monospace" color="black" >33</fo:block></fo:list-item-label>
<fo:list-item-body start-indent="30pt"><fo:block font-size="6pt" font-family="monospace" color="black" font-weight="normal">Elytr rep</fo:block></fo:list-item-body></fo:list-item>
<fo:list-item><fo:list-item-label><fo:block font-size="6pt" font-family="monospace" color="black" >684</fo:block></fo:list-item-label>
<fo:list-item-body start-indent="30pt"><fo:block font-size="6pt" font-family="monospace" color="black" font-weight="normal">Empet nig</fo:block></fo:list-item-body></fo:list-item>
<fo:list-item><fo:list-item-label><fo:block font-size="6pt" font-family="monospace" color="black" >699</fo:block></fo:list-item-label>
<fo:list-item-body start-indent="30pt"><fo:block font-size="6pt" font-family="monospace" color="black" font-weight="normal">Epilo bru</fo:block></fo:list-item-body></fo:list-item>
<fo:list-item><fo:list-item-label><fo:block font-size="6pt" font-family="monospace" color="black" >688</fo:block></fo:list-item-label>
<fo:list-item-body start-indent="30pt"><fo:block font-size="6pt" font-family="monospace" color="black" text-indent="5pt" font-weight="normal">  cil</fo:block></fo:list-item-body></fo:list-item>
<fo:list-item><fo:list-item-label><fo:block font-size="6pt" font-family="monospace" color="black" >692</fo:block></fo:list-item-label>
<fo:list-item-body start-indent="30pt"><fo:block font-size="6pt" font-family="monospace" color="black" text-indent="5pt" font-weight="normal">  hir</fo:block></fo:list-item-body></fo:list-item>
<fo:list-item><fo:list-item-label><fo:block font-size="6pt" font-family="monospace" color="black" >695</fo:block></fo:list-item-label>
<fo:list-item-body start-indent="30pt"><fo:block font-size="6pt" font-family="monospace" color="black" text-indent="5pt" font-weight="normal">  mon</fo:block></fo:list-item-body></fo:list-item>
<fo:list-item><fo:list-item-label><fo:block font-size="6pt" font-family="monospace" color="black" >696</fo:block></fo:list-item-label>
<fo:list-item-body start-indent="30pt"><fo:block font-size="6pt" font-family="monospace" color="black" text-indent="5pt" font-weight="normal">  obs</fo:block></fo:list-item-body></fo:list-item>
<fo:list-item><fo:list-item-label><fo:block font-size="6pt" font-family="monospace" color="black" >697</fo:block></fo:list-item-label>
<fo:list-item-body start-indent="30pt"><fo:block font-size="6pt" font-family="monospace" color="black" text-indent="5pt" font-weight="normal">  pal</fo:block></fo:list-item-body></fo:list-item>
<fo:list-item><fo:list-item-label><fo:block font-size="6pt" font-family="monospace" color="black" >698</fo:block></fo:list-item-label>
<fo:list-item-body start-indent="30pt"><fo:block font-size="6pt" font-family="monospace" color="black" text-indent="5pt" font-weight="normal">  par</fo:block></fo:list-item-body></fo:list-item>
<fo:list-item><fo:list-item-label><fo:block font-size="6pt" font-family="monospace" color="black" >705</fo:block></fo:list-item-label>
<fo:list-item-body start-indent="30pt"><fo:block font-size="6pt" font-family="monospace" color="black" font-weight="normal">Epipa hel</fo:block></fo:list-item-body></fo:list-item>
<fo:list-item><fo:list-item-label><fo:block font-size="6pt" font-family="monospace" color="black" >712</fo:block></fo:list-item-label>
<fo:list-item-body start-indent="30pt"><fo:block font-size="6pt" font-family="monospace" color="black" font-weight="normal">Equis arv</fo:block></fo:list-item-body></fo:list-item>
<fo:list-item><fo:list-item-label><fo:block font-size="6pt" font-family="monospace" color="black" >713</fo:block></fo:list-item-label>
<fo:list-item-body start-indent="30pt"><fo:block font-size="6pt" font-family="monospace" color="black" text-indent="5pt" font-weight="normal">  flu</fo:block></fo:list-item-body></fo:list-item>
<fo:list-item><fo:list-item-label><fo:block font-size="6pt" font-family="monospace" color="black" >714</fo:block></fo:list-item-label>
<fo:list-item-body start-indent="30pt"><fo:block font-size="6pt" font-family="monospace" color="black" text-indent="5pt" font-weight="normal">  hye</fo:block></fo:list-item-body></fo:list-item>
<fo:list-item><fo:list-item-label><fo:block font-size="6pt" font-family="monospace" color="black" >717</fo:block></fo:list-item-label>
<fo:list-item-body start-indent="30pt"><fo:block font-size="6pt" font-family="monospace" color="black" text-indent="5pt" font-weight="normal">  pal</fo:block></fo:list-item-body></fo:list-item>
<fo:list-item><fo:list-item-label><fo:block font-size="6pt" font-family="monospace" color="black" >720</fo:block></fo:list-item-label>
<fo:list-item-body start-indent="30pt"><fo:block font-size="6pt" font-family="monospace" color="black" text-indent="5pt" font-weight="normal">  syl</fo:block></fo:list-item-body></fo:list-item>
<fo:list-item><fo:list-item-label><fo:block font-size="6pt" font-family="monospace" color="black" >721</fo:block></fo:list-item-label>
<fo:list-item-body start-indent="30pt"><fo:block font-size="6pt" font-family="monospace" color="black" text-indent="5pt" font-weight="normal">  tel</fo:block></fo:list-item-body></fo:list-item>
<fo:list-item><fo:list-item-label><fo:block font-size="6pt" font-family="monospace" color="black" >726</fo:block></fo:list-item-label>
<fo:list-item-body start-indent="30pt"><fo:block font-size="6pt" font-family="monospace" color="black" font-weight="normal">Erica cin</fo:block></fo:list-item-body></fo:list-item>
<fo:list-item><fo:list-item-label><fo:block font-size="6pt" font-family="monospace" color="black" >731</fo:block></fo:list-item-label>
<fo:list-item-body start-indent="30pt"><fo:block font-size="6pt" font-family="monospace" color="black" text-indent="5pt" font-weight="normal">  tet</fo:block></fo:list-item-body></fo:list-item>
<fo:list-item><fo:list-item-label><fo:block font-size="6pt" font-family="monospace" color="black" >733</fo:block></fo:list-item-label>
<fo:list-item-body start-indent="30pt"><fo:block font-size="6pt" font-family="monospace" color="black" font-weight="normal">Erige acr</fo:block></fo:list-item-body></fo:list-item>
<fo:list-item><fo:list-item-label><fo:block font-size="6pt" font-family="monospace" color="black" >740</fo:block></fo:list-item-label>
<fo:list-item-body start-indent="30pt"><fo:block font-size="6pt" font-family="monospace" color="black" font-weight="normal">Eriop ang</fo:block></fo:list-item-body></fo:list-item>
<fo:list-item><fo:list-item-label><fo:block font-size="6pt" font-family="monospace" color="black" >744</fo:block></fo:list-item-label>
<fo:list-item-body start-indent="30pt"><fo:block font-size="6pt" font-family="monospace" color="black" text-indent="5pt" font-weight="normal">  vag</fo:block></fo:list-item-body></fo:list-item>
<fo:list-item><fo:list-item-label><fo:block font-size="6pt" font-family="monospace" color="black" >745</fo:block></fo:list-item-label>
<fo:list-item-body start-indent="30pt"><fo:block font-size="6pt" font-family="monospace" color="black" font-weight="normal">Erodi*cic</fo:block></fo:list-item-body></fo:list-item>
<fo:list-item><fo:list-item-label><fo:block font-size="6pt" font-family="monospace" color="black" >4342</fo:block></fo:list-item-label>
<fo:list-item-body start-indent="30pt"><fo:block font-size="6pt" font-family="monospace" color="black" font-weight="normal">Eroph ver</fo:block></fo:list-item-body></fo:list-item>
<fo:list-item><fo:list-item-label><fo:block font-size="6pt" font-family="monospace" color="black" >753</fo:block></fo:list-item-label>
<fo:list-item-body start-indent="30pt"><fo:block font-size="6pt" font-family="monospace" color="black" text-indent="5pt" font-weight="normal">  *ver</fo:block></fo:list-item-body></fo:list-item>
<fo:list-item><fo:list-item-label><fo:block font-size="6pt" font-family="monospace" color="black" >762</fo:block></fo:list-item-label>
<fo:list-item-body start-indent="30pt"><fo:block font-size="6pt" font-family="monospace" color="black" font-weight="normal">Euony eur</fo:block></fo:list-item-body></fo:list-item>
<fo:list-item><fo:list-item-label><fo:block font-size="6pt" font-family="monospace" color="black" >763</fo:block></fo:list-item-label>
<fo:list-item-body start-indent="30pt"><fo:block font-size="6pt" font-family="monospace" color="black" font-weight="normal">Eupat can</fo:block></fo:list-item-body></fo:list-item>
<fo:list-item><fo:list-item-label><fo:block font-size="6pt" font-family="monospace" color="black" >772</fo:block></fo:list-item-label>
<fo:list-item-body start-indent="30pt"><fo:block font-size="6pt" font-family="monospace" color="black" font-weight="normal">Eupho hel</fo:block></fo:list-item-body></fo:list-item>
<fo:list-item><fo:list-item-label><fo:block font-size="6pt" font-family="monospace" color="black" >777</fo:block></fo:list-item-label>
<fo:list-item-body start-indent="30pt"><fo:block font-size="6pt" font-family="monospace" color="black" text-indent="5pt" font-weight="normal">  peplus</fo:block></fo:list-item-body></fo:list-item>
<fo:list-item><fo:list-item-label><fo:block font-size="6pt" font-family="monospace" color="black" >798</fo:block></fo:list-item-label>
<fo:list-item-body start-indent="30pt"><fo:block font-size="6pt" font-family="monospace" color="black" font-weight="normal">Euphr nem</fo:block></fo:list-item-body></fo:list-item>
<fo:list-item><fo:list-item-label><fo:block font-size="6pt" font-family="monospace" color="black" >2243</fo:block></fo:list-item-label>
<fo:list-item-body start-indent="30pt"><fo:block font-size="6pt" font-family="monospace" color="black" text-indent="5pt" font-weight="normal">  *agg</fo:block></fo:list-item-body></fo:list-item>
<fo:list-item><fo:list-item-label><fo:block font-size="6pt" font-family="monospace" color="black" >810</fo:block></fo:list-item-label>
<fo:list-item-body start-indent="30pt"><fo:block font-size="6pt" font-family="monospace" color="black" font-weight="normal">Fagus syl</fo:block></fo:list-item-body></fo:list-item>
<fo:list-item><fo:list-item-label><fo:block font-size="6pt" font-family="monospace" color="black" >1527</fo:block></fo:list-item-label>
<fo:list-item-body start-indent="30pt"><fo:block font-size="6pt" font-family="monospace" color="black" font-weight="normal">Fallo con</fo:block></fo:list-item-body></fo:list-item>
<fo:list-item><fo:list-item-label><fo:block font-size="6pt" font-family="monospace" color="black" >1528</fo:block></fo:list-item-label>
<fo:list-item-body start-indent="30pt"><fo:block font-size="6pt" font-family="monospace" color="black" text-indent="5pt" font-weight="normal">  jap</fo:block></fo:list-item-body></fo:list-item>
<fo:list-item><fo:list-item-label><fo:block font-size="6pt" font-family="monospace" color="black" >822.2</fo:block></fo:list-item-label>
<fo:list-item-body start-indent="30pt"><fo:block font-size="6pt" font-family="monospace" color="black" font-weight="normal">Festu fil</fo:block></fo:list-item-body></fo:list-item>
<fo:list-item><fo:list-item-label><fo:block font-size="6pt" font-family="monospace" color="black" >822</fo:block></fo:list-item-label>
<fo:list-item-body start-indent="30pt"><fo:block font-size="6pt" font-family="monospace" color="black" text-indent="5pt" font-weight="normal">  ovi</fo:block></fo:list-item-body></fo:list-item>
<fo:list-item><fo:list-item-label><fo:block font-size="6pt" font-family="monospace" color="black" >821</fo:block></fo:list-item-label>
<fo:list-item-body start-indent="30pt"><fo:block font-size="6pt" font-family="monospace" color="black" text-indent="5pt" font-weight="normal">  *ovi</fo:block></fo:list-item-body></fo:list-item>
<fo:list-item><fo:list-item-label><fo:block font-size="6pt" font-family="monospace" color="black" >824</fo:block></fo:list-item-label>
<fo:list-item-body start-indent="30pt"><fo:block font-size="6pt" font-family="monospace" color="black" text-indent="5pt" font-weight="normal">  *rub</fo:block></fo:list-item-body></fo:list-item>
<fo:list-item><fo:list-item-label><fo:block font-size="6pt" font-family="monospace" color="black" >1649</fo:block></fo:list-item-label>
<fo:list-item-body start-indent="30pt"><fo:block font-size="6pt" font-family="monospace" color="black" font-weight="normal">Ficar ver</fo:block></fo:list-item-body></fo:list-item>
<fo:list-item><fo:list-item-label><fo:block font-size="6pt" font-family="monospace" color="black" >1649.2</fo:block></fo:list-item-label>
<fo:list-item-body start-indent="30pt"><fo:block font-size="6pt" font-family="monospace" color="black" text-indent="5pt" font-weight="normal">  ver fert</fo:block></fo:list-item-body></fo:list-item>
<fo:list-item><fo:list-item-label><fo:block font-size="6pt" font-family="monospace" color="black" >833</fo:block></fo:list-item-label>
<fo:list-item-body start-indent="30pt"><fo:block font-size="6pt" font-family="monospace" color="black" font-weight="normal">Filip ulm</fo:block></fo:list-item-body></fo:list-item>
<fo:list-item><fo:list-item-label><fo:block font-size="6pt" font-family="monospace" color="black" >838</fo:block></fo:list-item-label>
<fo:list-item-body start-indent="30pt"><fo:block font-size="6pt" font-family="monospace" color="black" font-weight="normal">Fraga ves</fo:block></fo:list-item-body></fo:list-item>
<fo:list-item><fo:list-item-label><fo:block font-size="6pt" font-family="monospace" color="black" >841</fo:block></fo:list-item-label>
<fo:list-item-body start-indent="30pt"><fo:block font-size="6pt" font-family="monospace" color="black" font-weight="normal">Fraxi exc</fo:block></fo:list-item-body></fo:list-item>
<fo:list-item><fo:list-item-label><fo:block font-size="6pt" font-family="monospace" color="black" >854</fo:block></fo:list-item-label>
<fo:list-item-body start-indent="30pt"><fo:block font-size="6pt" font-family="monospace" color="black" font-weight="normal">Fumar off</fo:block></fo:list-item-body></fo:list-item>
<fo:list-item><fo:list-item-label><fo:block font-size="6pt" font-family="monospace" color="black" >860</fo:block></fo:list-item-label>
<fo:list-item-body start-indent="30pt"><fo:block font-size="6pt" font-family="monospace" color="black" font-weight="normal">Galan niv</fo:block></fo:list-item-body></fo:list-item>
<fo:list-item><fo:list-item-label><fo:block font-size="6pt" font-family="monospace" color="black" >869</fo:block></fo:list-item-label>
<fo:list-item-body start-indent="30pt"><fo:block font-size="6pt" font-family="monospace" color="black" font-weight="normal">Galeo tet</fo:block></fo:list-item-body></fo:list-item>
<fo:list-item><fo:list-item-label><fo:block font-size="6pt" font-family="monospace" color="black" >868</fo:block></fo:list-item-label>
<fo:list-item-body start-indent="30pt"><fo:block font-size="6pt" font-family="monospace" color="black" text-indent="5pt" font-weight="normal">  *tet</fo:block></fo:list-item-body></fo:list-item>
<fo:list-item><fo:list-item-label><fo:block font-size="6pt" font-family="monospace" color="black" >879</fo:block></fo:list-item-label>
<fo:list-item-body start-indent="30pt"><fo:block font-size="6pt" font-family="monospace" color="black" font-weight="normal">Galiu alb</fo:block></fo:list-item-body></fo:list-item>
<fo:list-item><fo:list-item-label><fo:block font-size="6pt" font-family="monospace" color="black" >873</fo:block></fo:list-item-label>
<fo:list-item-body start-indent="30pt"><fo:block font-size="6pt" font-family="monospace" color="black" text-indent="5pt" font-weight="normal">  apa</fo:block></fo:list-item-body></fo:list-item>
<fo:list-item><fo:list-item-label><fo:block font-size="6pt" font-family="monospace" color="black" >183</fo:block></fo:list-item-label>
<fo:list-item-body start-indent="30pt"><fo:block font-size="6pt" font-family="monospace" color="black" text-indent="5pt" font-weight="normal">  odo</fo:block></fo:list-item-body></fo:list-item>
<fo:list-item><fo:list-item-label><fo:block font-size="6pt" font-family="monospace" color="black" >882</fo:block></fo:list-item-label>
<fo:list-item-body start-indent="30pt"><fo:block font-size="6pt" font-family="monospace" color="black" text-indent="5pt" font-weight="normal">  pal</fo:block></fo:list-item-body></fo:list-item>
<fo:list-item><fo:list-item-label><fo:block font-size="6pt" font-family="monospace" color="black" >878</fo:block></fo:list-item-label>
<fo:list-item-body start-indent="30pt"><fo:block font-size="6pt" font-family="monospace" color="black" text-indent="5pt" font-weight="normal">  sax</fo:block></fo:list-item-body></fo:list-item>
<fo:list-item><fo:list-item-label><fo:block font-size="6pt" font-family="monospace" color="black" >887</fo:block></fo:list-item-label>
<fo:list-item-body start-indent="30pt"><fo:block font-size="6pt" font-family="monospace" color="black" text-indent="5pt" font-weight="normal">  uli</fo:block></fo:list-item-body></fo:list-item>
<fo:list-item><fo:list-item-label><fo:block font-size="6pt" font-family="monospace" color="black" >888</fo:block></fo:list-item-label>
<fo:list-item-body start-indent="30pt"><fo:block font-size="6pt" font-family="monospace" color="black" text-indent="5pt" font-weight="normal">  verum</fo:block></fo:list-item-body></fo:list-item>
<fo:list-item><fo:list-item-label><fo:block font-size="6pt" font-family="monospace" color="black" >897</fo:block></fo:list-item-label>
<fo:list-item-body start-indent="30pt"><fo:block font-size="6pt" font-family="monospace" color="black" font-weight="normal">Genti ama</fo:block></fo:list-item-body></fo:list-item>
<fo:list-item><fo:list-item-label><fo:block font-size="6pt" font-family="monospace" color="black" >907</fo:block></fo:list-item-label>
<fo:list-item-body start-indent="30pt"><fo:block font-size="6pt" font-family="monospace" color="black" font-weight="normal">Geran dis</fo:block></fo:list-item-body></fo:list-item>
<fo:list-item><fo:list-item-label><fo:block font-size="6pt" font-family="monospace" color="black" >909</fo:block></fo:list-item-label>
<fo:list-item-body start-indent="30pt"><fo:block font-size="6pt" font-family="monospace" color="black" text-indent="5pt" font-weight="normal">  luc</fo:block></fo:list-item-body></fo:list-item>
<fo:list-item><fo:list-item-label><fo:block font-size="6pt" font-family="monospace" color="black" >911</fo:block></fo:list-item-label>
<fo:list-item-body start-indent="30pt"><fo:block font-size="6pt" font-family="monospace" color="black" text-indent="5pt" font-weight="normal">  mol</fo:block></fo:list-item-body></fo:list-item>
<fo:list-item><fo:list-item-label><fo:block font-size="6pt" font-family="monospace" color="black" >914</fo:block></fo:list-item-label>
<fo:list-item-body start-indent="30pt"><fo:block font-size="6pt" font-family="monospace" color="black" text-indent="5pt" font-weight="normal">  pra</fo:block></fo:list-item-body></fo:list-item>
<fo:list-item><fo:list-item-label><fo:block font-size="6pt" font-family="monospace" color="black" >917</fo:block></fo:list-item-label>
<fo:list-item-body start-indent="30pt"><fo:block font-size="6pt" font-family="monospace" color="black" text-indent="5pt" font-weight="normal">  pyr</fo:block></fo:list-item-body></fo:list-item>
<fo:list-item><fo:list-item-label><fo:block font-size="6pt" font-family="monospace" color="black" >918</fo:block></fo:list-item-label>
<fo:list-item-body start-indent="30pt"><fo:block font-size="6pt" font-family="monospace" color="black" text-indent="5pt" font-weight="normal">  rob</fo:block></fo:list-item-body></fo:list-item>
<fo:list-item><fo:list-item-label><fo:block font-size="6pt" font-family="monospace" color="black" >920</fo:block></fo:list-item-label>
<fo:list-item-body start-indent="30pt"><fo:block font-size="6pt" font-family="monospace" color="black" text-indent="5pt" font-weight="normal">  san</fo:block></fo:list-item-body></fo:list-item>
<fo:list-item><fo:list-item-label><fo:block font-size="6pt" font-family="monospace" color="black" >921</fo:block></fo:list-item-label>
<fo:list-item-body start-indent="30pt"><fo:block font-size="6pt" font-family="monospace" color="black" text-indent="5pt" font-weight="normal">  syl</fo:block></fo:list-item-body></fo:list-item>
<fo:list-item><fo:list-item-label><fo:block font-size="6pt" font-family="monospace" color="black" >924</fo:block></fo:list-item-label>
<fo:list-item-body start-indent="30pt"><fo:block font-size="6pt" font-family="monospace" color="black" font-weight="normal">Geum  riv</fo:block></fo:list-item-body></fo:list-item>
<fo:list-item><fo:list-item-label><fo:block font-size="6pt" font-family="monospace" color="black" >925</fo:block></fo:list-item-label>
<fo:list-item-body start-indent="30pt"><fo:block font-size="6pt" font-family="monospace" color="black" text-indent="5pt" font-weight="normal">   urb</fo:block></fo:list-item-body></fo:list-item>
<fo:list-item><fo:list-item-label><fo:block font-size="6pt" font-family="monospace" color="black" >923</fo:block></fo:list-item-label>
<fo:list-item-body start-indent="30pt"><fo:block font-size="6pt" font-family="monospace" color="black" text-indent="5pt" font-weight="normal">  x int</fo:block></fo:list-item-body></fo:list-item>
<fo:list-item><fo:list-item-label><fo:block font-size="6pt" font-family="monospace" color="black" >931</fo:block></fo:list-item-label>
<fo:list-item-body start-indent="30pt"><fo:block font-size="6pt" font-family="monospace" color="black" font-weight="normal">Glech hed</fo:block></fo:list-item-body></fo:list-item>
<fo:list-item><fo:list-item-label><fo:block font-size="6pt" font-family="monospace" color="black" >933</fo:block></fo:list-item-label>
<fo:list-item-body start-indent="30pt"><fo:block font-size="6pt" font-family="monospace" color="black" font-weight="normal">Glyce flu</fo:block></fo:list-item-body></fo:list-item>
<fo:list-item><fo:list-item-label><fo:block font-size="6pt" font-family="monospace" color="black" >934</fo:block></fo:list-item-label>
<fo:list-item-body start-indent="30pt"><fo:block font-size="6pt" font-family="monospace" color="black" text-indent="5pt" font-weight="normal">  max</fo:block></fo:list-item-body></fo:list-item>
<fo:list-item><fo:list-item-label><fo:block font-size="6pt" font-family="monospace" color="black" >936</fo:block></fo:list-item-label>
<fo:list-item-body start-indent="30pt"><fo:block font-size="6pt" font-family="monospace" color="black" text-indent="5pt" font-weight="normal">  not</fo:block></fo:list-item-body></fo:list-item>
<fo:list-item><fo:list-item-label><fo:block font-size="6pt" font-family="monospace" color="black" >941</fo:block></fo:list-item-label>
<fo:list-item-body start-indent="30pt"><fo:block font-size="6pt" font-family="monospace" color="black" font-weight="normal">Gnaph uli</fo:block></fo:list-item-body></fo:list-item>
<fo:list-item><fo:list-item-label><fo:block font-size="6pt" font-family="monospace" color="black" >948.1</fo:block></fo:list-item-label>
<fo:list-item-body start-indent="30pt"><fo:block font-size="6pt" font-family="monospace" color="black" font-weight="normal">Gymna con</fo:block></fo:list-item-body></fo:list-item>
<fo:list-item><fo:list-item-label><fo:block font-size="6pt" font-family="monospace" color="black" >948</fo:block></fo:list-item-label>
<fo:list-item-body start-indent="30pt"><fo:block font-size="6pt" font-family="monospace" color="black" text-indent="5pt" font-weight="normal">  *con</fo:block></fo:list-item-body></fo:list-item>
<fo:list-item><fo:list-item-label><fo:block font-size="6pt" font-family="monospace" color="black" >2050</fo:block></fo:list-item-label>
<fo:list-item-body start-indent="30pt"><fo:block font-size="6pt" font-family="monospace" color="black" font-weight="normal">Gymno dry</fo:block></fo:list-item-body></fo:list-item>
<fo:list-item><fo:list-item-label><fo:block font-size="6pt" font-family="monospace" color="black" >952</fo:block></fo:list-item-label>
<fo:list-item-body start-indent="30pt"><fo:block font-size="6pt" font-family="monospace" color="black" font-weight="normal">Heder hel</fo:block></fo:list-item-body></fo:list-item>
<fo:list-item><fo:list-item-label><fo:block font-size="6pt" font-family="monospace" color="black" >952.1</fo:block></fo:list-item-label>
<fo:list-item-body start-indent="30pt"><fo:block font-size="6pt" font-family="monospace" color="black" text-indent="5pt" font-weight="normal">  hel hel</fo:block></fo:list-item-body></fo:list-item>
<fo:list-item><fo:list-item-label><fo:block font-size="6pt" font-family="monospace" color="black" >955</fo:block></fo:list-item-label>
<fo:list-item-body start-indent="30pt"><fo:block font-size="6pt" font-family="monospace" color="black" font-weight="normal">Helia num</fo:block></fo:list-item-body></fo:list-item>
<fo:list-item><fo:list-item-label><fo:block font-size="6pt" font-family="monospace" color="black" >966</fo:block></fo:list-item-label>
<fo:list-item-body start-indent="30pt"><fo:block font-size="6pt" font-family="monospace" color="black" font-weight="normal">Herac man</fo:block></fo:list-item-body></fo:list-item>
<fo:list-item><fo:list-item-label><fo:block font-size="6pt" font-family="monospace" color="black" >968</fo:block></fo:list-item-label>
<fo:list-item-body start-indent="30pt"><fo:block font-size="6pt" font-family="monospace" color="black" text-indent="5pt" font-weight="normal">  sph</fo:block></fo:list-item-body></fo:list-item>
<fo:list-item><fo:list-item-label><fo:block font-size="6pt" font-family="monospace" color="black" >975</fo:block></fo:list-item-label>
<fo:list-item-body start-indent="30pt"><fo:block font-size="6pt" font-family="monospace" color="black" font-weight="normal">Hespe mat</fo:block></fo:list-item-body></fo:list-item>
<fo:list-item><fo:list-item-label><fo:block font-size="6pt" font-family="monospace" color="black" >2560</fo:block></fo:list-item-label>
<fo:list-item-body start-indent="30pt"><fo:block font-size="6pt" font-family="monospace" color="black" font-weight="normal">Hiera*agg</fo:block></fo:list-item-body></fo:list-item>
<fo:list-item><fo:list-item-label><fo:block font-size="6pt" font-family="monospace" color="black" >3146</fo:block></fo:list-item-label>
<fo:list-item-body start-indent="30pt"><fo:block font-size="6pt" font-family="monospace" color="black" text-indent="5pt" font-weight="normal">  sab</fo:block></fo:list-item-body></fo:list-item>
<fo:list-item><fo:list-item-label><fo:block font-size="6pt" font-family="monospace" color="black" >3240</fo:block></fo:list-item-label>
<fo:list-item-body start-indent="30pt"><fo:block font-size="6pt" font-family="monospace" color="black" text-indent="5pt" font-weight="normal">  vul</fo:block></fo:list-item-body></fo:list-item>
<fo:list-item><fo:list-item-label><fo:block font-size="6pt" font-family="monospace" color="black" >980</fo:block></fo:list-item-label>
<fo:list-item-body start-indent="30pt"><fo:block font-size="6pt" font-family="monospace" color="black" font-weight="normal">Hippo rha</fo:block></fo:list-item-body></fo:list-item>
<fo:list-item><fo:list-item-label><fo:block font-size="6pt" font-family="monospace" color="black" >981</fo:block></fo:list-item-label>
<fo:list-item-body start-indent="30pt"><fo:block font-size="6pt" font-family="monospace" color="black" font-weight="normal">Hippu vul</fo:block></fo:list-item-body></fo:list-item>
<fo:list-item><fo:list-item-label><fo:block font-size="6pt" font-family="monospace" color="black" >983</fo:block></fo:list-item-label>
<fo:list-item-body start-indent="30pt"><fo:block font-size="6pt" font-family="monospace" color="black" font-weight="normal">Holcu lan</fo:block></fo:list-item-body></fo:list-item>
<fo:list-item><fo:list-item-label><fo:block font-size="6pt" font-family="monospace" color="black" >984</fo:block></fo:list-item-label>
<fo:list-item-body start-indent="30pt"><fo:block font-size="6pt" font-family="monospace" color="black" text-indent="5pt" font-weight="normal">  mol</fo:block></fo:list-item-body></fo:list-item>
<fo:list-item><fo:list-item-label><fo:block font-size="6pt" font-family="monospace" color="black" >992</fo:block></fo:list-item-label>
<fo:list-item-body start-indent="30pt"><fo:block font-size="6pt" font-family="monospace" color="black" font-weight="normal">Horde mur</fo:block></fo:list-item-body></fo:list-item>
<fo:list-item><fo:list-item-label><fo:block font-size="6pt" font-family="monospace" color="black" >686</fo:block></fo:list-item-label>
<fo:list-item-body start-indent="30pt"><fo:block font-size="6pt" font-family="monospace" color="black" font-weight="normal">Hyaci his</fo:block></fo:list-item-body></fo:list-item>
<fo:list-item><fo:list-item-label><fo:block font-size="6pt" font-family="monospace" color="black" >687</fo:block></fo:list-item-label>
<fo:list-item-body start-indent="30pt"><fo:block font-size="6pt" font-family="monospace" color="black" text-indent="5pt" font-weight="normal">  non</fo:block></fo:list-item-body></fo:list-item>
<fo:list-item><fo:list-item-label><fo:block font-size="6pt" font-family="monospace" color="black" >999</fo:block></fo:list-item-label>
<fo:list-item-body start-indent="30pt"><fo:block font-size="6pt" font-family="monospace" color="black" font-weight="normal">Hydro vul</fo:block></fo:list-item-body></fo:list-item>
<fo:list-item><fo:list-item-label><fo:block font-size="6pt" font-family="monospace" color="black" >1003</fo:block></fo:list-item-label>
<fo:list-item-body start-indent="30pt"><fo:block font-size="6pt" font-family="monospace" color="black" font-weight="normal">Hyper and</fo:block></fo:list-item-body></fo:list-item>
<fo:list-item><fo:list-item-label><fo:block font-size="6pt" font-family="monospace" color="black" >1010</fo:block></fo:list-item-label>
<fo:list-item-body start-indent="30pt"><fo:block font-size="6pt" font-family="monospace" color="black" text-indent="5pt" font-weight="normal">  hirsut</fo:block></fo:list-item-body></fo:list-item>
<fo:list-item><fo:list-item-label><fo:block font-size="6pt" font-family="monospace" color="black" >1006</fo:block></fo:list-item-label>
<fo:list-item-body start-indent="30pt"><fo:block font-size="6pt" font-family="monospace" color="black" text-indent="5pt" font-weight="normal">  mac</fo:block></fo:list-item-body></fo:list-item>
<fo:list-item><fo:list-item-label><fo:block font-size="6pt" font-family="monospace" color="black" >1014</fo:block></fo:list-item-label>
<fo:list-item-body start-indent="30pt"><fo:block font-size="6pt" font-family="monospace" color="black" text-indent="5pt" font-weight="normal">  per</fo:block></fo:list-item-body></fo:list-item>
<fo:list-item><fo:list-item-label><fo:block font-size="6pt" font-family="monospace" color="black" >1015</fo:block></fo:list-item-label>
<fo:list-item-body start-indent="30pt"><fo:block font-size="6pt" font-family="monospace" color="black" text-indent="5pt" font-weight="normal">  pul</fo:block></fo:list-item-body></fo:list-item>
<fo:list-item><fo:list-item-label><fo:block font-size="6pt" font-family="monospace" color="black" >1016</fo:block></fo:list-item-label>
<fo:list-item-body start-indent="30pt"><fo:block font-size="6pt" font-family="monospace" color="black" text-indent="5pt" font-weight="normal">  tet</fo:block></fo:list-item-body></fo:list-item>
<fo:list-item><fo:list-item-label><fo:block font-size="6pt" font-family="monospace" color="black" >1020</fo:block></fo:list-item-label>
<fo:list-item-body start-indent="30pt"><fo:block font-size="6pt" font-family="monospace" color="black" font-weight="normal">Hypoc rad</fo:block></fo:list-item-body></fo:list-item>
<fo:list-item><fo:list-item-label><fo:block font-size="6pt" font-family="monospace" color="black" >1023</fo:block></fo:list-item-label>
<fo:list-item-body start-indent="30pt"><fo:block font-size="6pt" font-family="monospace" color="black" font-weight="normal">Ilex aqu</fo:block></fo:list-item-body></fo:list-item>
<fo:list-item><fo:list-item-label><fo:block font-size="6pt" font-family="monospace" color="black" >1026</fo:block></fo:list-item-label>
<fo:list-item-body start-indent="30pt"><fo:block font-size="6pt" font-family="monospace" color="black" font-weight="normal">Impat gla</fo:block></fo:list-item-body></fo:list-item>
<fo:list-item><fo:list-item-label><fo:block font-size="6pt" font-family="monospace" color="black" >1038</fo:block></fo:list-item-label>
<fo:list-item-body start-indent="30pt"><fo:block font-size="6pt" font-family="monospace" color="black" font-weight="normal">Iris  pse</fo:block></fo:list-item-body></fo:list-item>
<fo:list-item><fo:list-item-label><fo:block font-size="6pt" font-family="monospace" color="black" >1047</fo:block></fo:list-item-label>
<fo:list-item-body start-indent="30pt"><fo:block font-size="6pt" font-family="monospace" color="black" font-weight="normal">Isole set</fo:block></fo:list-item-body></fo:list-item>
<fo:list-item><fo:list-item-label><fo:block font-size="6pt" font-family="monospace" color="black" >1050</fo:block></fo:list-item-label>
<fo:list-item-body start-indent="30pt"><fo:block font-size="6pt" font-family="monospace" color="black" font-weight="normal">Juncu acutif</fo:block></fo:list-item-body></fo:list-item>
<fo:list-item><fo:list-item-label><fo:block font-size="6pt" font-family="monospace" color="black" >1054</fo:block></fo:list-item-label>
<fo:list-item-body start-indent="30pt"><fo:block font-size="6pt" font-family="monospace" color="black" text-indent="5pt" font-weight="normal">  art</fo:block></fo:list-item-body></fo:list-item>
<fo:list-item><fo:list-item-label><fo:block font-size="6pt" font-family="monospace" color="black" >1057.2</fo:block></fo:list-item-label>
<fo:list-item-body start-indent="30pt"><fo:block font-size="6pt" font-family="monospace" color="black" text-indent="5pt" font-weight="normal">  buf</fo:block></fo:list-item-body></fo:list-item>
<fo:list-item><fo:list-item-label><fo:block font-size="6pt" font-family="monospace" color="black" >1057</fo:block></fo:list-item-label>
<fo:list-item-body start-indent="30pt"><fo:block font-size="6pt" font-family="monospace" color="black" text-indent="5pt" font-weight="normal">  *buf</fo:block></fo:list-item-body></fo:list-item>
<fo:list-item><fo:list-item-label><fo:block font-size="6pt" font-family="monospace" color="black" >1058</fo:block></fo:list-item-label>
<fo:list-item-body start-indent="30pt"><fo:block font-size="6pt" font-family="monospace" color="black" text-indent="5pt" font-weight="normal">  bul</fo:block></fo:list-item-body></fo:list-item>
<fo:list-item><fo:list-item-label><fo:block font-size="6pt" font-family="monospace" color="black" >1063</fo:block></fo:list-item-label>
<fo:list-item-body start-indent="30pt"><fo:block font-size="6pt" font-family="monospace" color="black" text-indent="5pt" font-weight="normal">  con</fo:block></fo:list-item-body></fo:list-item>
<fo:list-item><fo:list-item-label><fo:block font-size="6pt" font-family="monospace" color="black" >1067</fo:block></fo:list-item-label>
<fo:list-item-body start-indent="30pt"><fo:block font-size="6pt" font-family="monospace" color="black" text-indent="5pt" font-weight="normal">  eff</fo:block></fo:list-item-body></fo:list-item>
<fo:list-item><fo:list-item-label><fo:block font-size="6pt" font-family="monospace" color="black" >1070</fo:block></fo:list-item-label>
<fo:list-item-body start-indent="30pt"><fo:block font-size="6pt" font-family="monospace" color="black" text-indent="5pt" font-weight="normal">  inf</fo:block></fo:list-item-body></fo:list-item>
<fo:list-item><fo:list-item-label><fo:block font-size="6pt" font-family="monospace" color="black" >1075</fo:block></fo:list-item-label>
<fo:list-item-body start-indent="30pt"><fo:block font-size="6pt" font-family="monospace" color="black" text-indent="5pt" font-weight="normal">  squ</fo:block></fo:list-item-body></fo:list-item>
<fo:list-item><fo:list-item-label><fo:block font-size="6pt" font-family="monospace" color="black" >1080</fo:block></fo:list-item-label>
<fo:list-item-body start-indent="30pt"><fo:block font-size="6pt" font-family="monospace" color="black" font-weight="normal">Junip com</fo:block></fo:list-item-body></fo:list-item>
<fo:list-item><fo:list-item-label><fo:block font-size="6pt" font-family="monospace" color="black" >1084</fo:block></fo:list-item-label>
<fo:list-item-body start-indent="30pt"><fo:block font-size="6pt" font-family="monospace" color="black" font-weight="normal">Knaut arv</fo:block></fo:list-item-body></fo:list-item>
<fo:list-item><fo:list-item-label><fo:block font-size="6pt" font-family="monospace" color="black" >1087</fo:block></fo:list-item-label>
<fo:list-item-body start-indent="30pt"><fo:block font-size="6pt" font-family="monospace" color="black" font-weight="normal">Koele mac</fo:block></fo:list-item-body></fo:list-item>
<fo:list-item><fo:list-item-label><fo:block font-size="6pt" font-family="monospace" color="black" >1091</fo:block></fo:list-item-label>
<fo:list-item-body start-indent="30pt"><fo:block font-size="6pt" font-family="monospace" color="black" font-weight="normal">Labur ana</fo:block></fo:list-item-body></fo:list-item>
<fo:list-item><fo:list-item-label><fo:block font-size="6pt" font-family="monospace" color="black" >1095</fo:block></fo:list-item-label>
<fo:list-item-body start-indent="30pt"><fo:block font-size="6pt" font-family="monospace" color="black" font-weight="normal">Lactu vir</fo:block></fo:list-item-body></fo:list-item>
<fo:list-item><fo:list-item-label><fo:block font-size="6pt" font-family="monospace" color="black" >862</fo:block></fo:list-item-label>
<fo:list-item-body start-indent="30pt"><fo:block font-size="6pt" font-family="monospace" color="black" font-weight="normal">Lamia gal</fo:block></fo:list-item-body></fo:list-item>
<fo:list-item><fo:list-item-label><fo:block font-size="6pt" font-family="monospace" color="black" >2667</fo:block></fo:list-item-label>
<fo:list-item-body start-indent="30pt"><fo:block font-size="6pt" font-family="monospace" color="black" text-indent="5pt" font-weight="normal">  gal arg</fo:block></fo:list-item-body></fo:list-item>
<fo:list-item><fo:list-item-label><fo:block font-size="6pt" font-family="monospace" color="black" >1098</fo:block></fo:list-item-label>
<fo:list-item-body start-indent="30pt"><fo:block font-size="6pt" font-family="monospace" color="black" font-weight="normal">Lamiu alb</fo:block></fo:list-item-body></fo:list-item>
<fo:list-item><fo:list-item-label><fo:block font-size="6pt" font-family="monospace" color="black" >1103</fo:block></fo:list-item-label>
<fo:list-item-body start-indent="30pt"><fo:block font-size="6pt" font-family="monospace" color="black" text-indent="5pt" font-weight="normal">  pur</fo:block></fo:list-item-body></fo:list-item>
<fo:list-item><fo:list-item-label><fo:block font-size="6pt" font-family="monospace" color="black" >1104</fo:block></fo:list-item-label>
<fo:list-item-body start-indent="30pt"><fo:block font-size="6pt" font-family="monospace" color="black" font-weight="normal">Lapsa com</fo:block></fo:list-item-body></fo:list-item>
<fo:list-item><fo:list-item-label><fo:block font-size="6pt" font-family="monospace" color="black" >1105</fo:block></fo:list-item-label>
<fo:list-item-body start-indent="30pt"><fo:block font-size="6pt" font-family="monospace" color="black" font-weight="normal">Larix dec</fo:block></fo:list-item-body></fo:list-item>
<fo:list-item><fo:list-item-label><fo:block font-size="6pt" font-family="monospace" color="black" >2302</fo:block></fo:list-item-label>
<fo:list-item-body start-indent="30pt"><fo:block font-size="6pt" font-family="monospace" color="black" text-indent="5pt" font-weight="normal">  kae</fo:block></fo:list-item-body></fo:list-item>
<fo:list-item><fo:list-item-label><fo:block font-size="6pt" font-family="monospace" color="black" >2303</fo:block></fo:list-item-label>
<fo:list-item-body start-indent="30pt"><fo:block font-size="6pt" font-family="monospace" color="black" text-indent="5pt" font-weight="normal">  x mar</fo:block></fo:list-item-body></fo:list-item>
<fo:list-item><fo:list-item-label><fo:block font-size="6pt" font-family="monospace" color="black" >1112</fo:block></fo:list-item-label>
<fo:list-item-body start-indent="30pt"><fo:block font-size="6pt" font-family="monospace" color="black" font-weight="normal">Lathy lin</fo:block></fo:list-item-body></fo:list-item>
<fo:list-item><fo:list-item-label><fo:block font-size="6pt" font-family="monospace" color="black" >1116</fo:block></fo:list-item-label>
<fo:list-item-body start-indent="30pt"><fo:block font-size="6pt" font-family="monospace" color="black" text-indent="5pt" font-weight="normal">  pra</fo:block></fo:list-item-body></fo:list-item>
<fo:list-item><fo:list-item-label><fo:block font-size="6pt" font-family="monospace" color="black" >1126</fo:block></fo:list-item-label>
<fo:list-item-body start-indent="30pt"><fo:block font-size="6pt" font-family="monospace" color="black" font-weight="normal">Lemna minor</fo:block></fo:list-item-body></fo:list-item>
<fo:list-item><fo:list-item-label><fo:block font-size="6pt" font-family="monospace" color="black" >1128</fo:block></fo:list-item-label>
<fo:list-item-body start-indent="30pt"><fo:block font-size="6pt" font-family="monospace" color="black" text-indent="5pt" font-weight="normal">  tri</fo:block></fo:list-item-body></fo:list-item>
<fo:list-item><fo:list-item-label><fo:block font-size="6pt" font-family="monospace" color="black" >1130</fo:block></fo:list-item-label>
<fo:list-item-body start-indent="30pt"><fo:block font-size="6pt" font-family="monospace" color="black" font-weight="normal">Leont his</fo:block></fo:list-item-body></fo:list-item>
<fo:list-item><fo:list-item-label><fo:block font-size="6pt" font-family="monospace" color="black" >502</fo:block></fo:list-item-label>
<fo:list-item-body start-indent="30pt"><fo:block font-size="6pt" font-family="monospace" color="black" font-weight="normal">Leuca vul</fo:block></fo:list-item-body></fo:list-item>
<fo:list-item><fo:list-item-label><fo:block font-size="6pt" font-family="monospace" color="black" >2621</fo:block></fo:list-item-label>
<fo:list-item-body start-indent="30pt"><fo:block font-size="6pt" font-family="monospace" color="black" text-indent="5pt" font-weight="normal">  x sup</fo:block></fo:list-item-body></fo:list-item>
<fo:list-item><fo:list-item-label><fo:block font-size="6pt" font-family="monospace" color="black" >2250</fo:block></fo:list-item-label>
<fo:list-item-body start-indent="30pt"><fo:block font-size="6pt" font-family="monospace" color="black" font-weight="normal">Ligus ova</fo:block></fo:list-item-body></fo:list-item>
<fo:list-item><fo:list-item-label><fo:block font-size="6pt" font-family="monospace" color="black" >1144</fo:block></fo:list-item-label>
<fo:list-item-body start-indent="30pt"><fo:block font-size="6pt" font-family="monospace" color="black" text-indent="5pt" font-weight="normal">  vul</fo:block></fo:list-item-body></fo:list-item>
<fo:list-item><fo:list-item-label><fo:block font-size="6pt" font-family="monospace" color="black" >1160</fo:block></fo:list-item-label>
<fo:list-item-body start-indent="30pt"><fo:block font-size="6pt" font-family="monospace" color="black" font-weight="normal">Linar pur</fo:block></fo:list-item-body></fo:list-item>
<fo:list-item><fo:list-item-label><fo:block font-size="6pt" font-family="monospace" color="black" >1164</fo:block></fo:list-item-label>
<fo:list-item-body start-indent="30pt"><fo:block font-size="6pt" font-family="monospace" color="black" text-indent="5pt" font-weight="normal">  vul</fo:block></fo:list-item-body></fo:list-item>
<fo:list-item><fo:list-item-label><fo:block font-size="6pt" font-family="monospace" color="black" >1169</fo:block></fo:list-item-label>
<fo:list-item-body start-indent="30pt"><fo:block font-size="6pt" font-family="monospace" color="black" font-weight="normal">Linum cat</fo:block></fo:list-item-body></fo:list-item>
<fo:list-item><fo:list-item-label><fo:block font-size="6pt" font-family="monospace" color="black" >1182</fo:block></fo:list-item-label>
<fo:list-item-body start-indent="30pt"><fo:block font-size="6pt" font-family="monospace" color="black" font-weight="normal">Loliu mul</fo:block></fo:list-item-body></fo:list-item>
<fo:list-item><fo:list-item-label><fo:block font-size="6pt" font-family="monospace" color="black" >1183</fo:block></fo:list-item-label>
<fo:list-item-body start-indent="30pt"><fo:block font-size="6pt" font-family="monospace" color="black" text-indent="5pt" font-weight="normal">  per</fo:block></fo:list-item-body></fo:list-item>
<fo:list-item><fo:list-item-label><fo:block font-size="6pt" font-family="monospace" color="black" >1188</fo:block></fo:list-item-label>
<fo:list-item-body start-indent="30pt"><fo:block font-size="6pt" font-family="monospace" color="black" font-weight="normal">Lonic per</fo:block></fo:list-item-body></fo:list-item>
<fo:list-item><fo:list-item-label><fo:block font-size="6pt" font-family="monospace" color="black" >1191</fo:block></fo:list-item-label>
<fo:list-item-body start-indent="30pt"><fo:block font-size="6pt" font-family="monospace" color="black" font-weight="normal">Lotus cor</fo:block></fo:list-item-body></fo:list-item>
<fo:list-item><fo:list-item-label><fo:block font-size="6pt" font-family="monospace" color="black" >1194</fo:block></fo:list-item-label>
<fo:list-item-body start-indent="30pt"><fo:block font-size="6pt" font-family="monospace" color="black" text-indent="5pt" font-weight="normal">  ped</fo:block></fo:list-item-body></fo:list-item>
<fo:list-item><fo:list-item-label><fo:block font-size="6pt" font-family="monospace" color="black" >1195</fo:block></fo:list-item-label>
<fo:list-item-body start-indent="30pt"><fo:block font-size="6pt" font-family="monospace" color="black" font-weight="normal">Lunar ann</fo:block></fo:list-item-body></fo:list-item>
<fo:list-item><fo:list-item-label><fo:block font-size="6pt" font-family="monospace" color="black" >1201</fo:block></fo:list-item-label>
<fo:list-item-body start-indent="30pt"><fo:block font-size="6pt" font-family="monospace" color="black" font-weight="normal">Luzul cam</fo:block></fo:list-item-body></fo:list-item>
<fo:list-item><fo:list-item-label><fo:block font-size="6pt" font-family="monospace" color="black" >1204</fo:block></fo:list-item-label>
<fo:list-item-body start-indent="30pt"><fo:block font-size="6pt" font-family="monospace" color="black" text-indent="5pt" font-weight="normal">  mul</fo:block></fo:list-item-body></fo:list-item>
<fo:list-item><fo:list-item-label><fo:block font-size="6pt" font-family="monospace" color="black" >1207</fo:block></fo:list-item-label>
<fo:list-item-body start-indent="30pt"><fo:block font-size="6pt" font-family="monospace" color="black" text-indent="5pt" font-weight="normal">  pil</fo:block></fo:list-item-body></fo:list-item>
<fo:list-item><fo:list-item-label><fo:block font-size="6pt" font-family="monospace" color="black" >1209</fo:block></fo:list-item-label>
<fo:list-item-body start-indent="30pt"><fo:block font-size="6pt" font-family="monospace" color="black" text-indent="5pt" font-weight="normal">  syl</fo:block></fo:list-item-body></fo:list-item>
<fo:list-item><fo:list-item-label><fo:block font-size="6pt" font-family="monospace" color="black" >1221</fo:block></fo:list-item-label>
<fo:list-item-body start-indent="30pt"><fo:block font-size="6pt" font-family="monospace" color="black" font-weight="normal">Lysim nem</fo:block></fo:list-item-body></fo:list-item>
<fo:list-item><fo:list-item-label><fo:block font-size="6pt" font-family="monospace" color="black" >1223</fo:block></fo:list-item-label>
<fo:list-item-body start-indent="30pt"><fo:block font-size="6pt" font-family="monospace" color="black" text-indent="5pt" font-weight="normal">  pun</fo:block></fo:list-item-body></fo:list-item>
<fo:list-item><fo:list-item-label><fo:block font-size="6pt" font-family="monospace" color="black" >1225</fo:block></fo:list-item-label>
<fo:list-item-body start-indent="30pt"><fo:block font-size="6pt" font-family="monospace" color="black" text-indent="5pt" font-weight="normal">  vul</fo:block></fo:list-item-body></fo:list-item>
<fo:list-item><fo:list-item-label><fo:block font-size="6pt" font-family="monospace" color="black" >1227</fo:block></fo:list-item-label>
<fo:list-item-body start-indent="30pt"><fo:block font-size="6pt" font-family="monospace" color="black" font-weight="normal">Lythr sal</fo:block></fo:list-item-body></fo:list-item>
<fo:list-item><fo:list-item-label><fo:block font-size="6pt" font-family="monospace" color="black" >1230.1</fo:block></fo:list-item-label>
<fo:list-item-body start-indent="30pt"><fo:block font-size="6pt" font-family="monospace" color="black" font-weight="normal">Malus pum</fo:block></fo:list-item-body></fo:list-item>
<fo:list-item><fo:list-item-label><fo:block font-size="6pt" font-family="monospace" color="black" >1230</fo:block></fo:list-item-label>
<fo:list-item-body start-indent="30pt"><fo:block font-size="6pt" font-family="monospace" color="black" text-indent="5pt" font-weight="normal">  *syl</fo:block></fo:list-item-body></fo:list-item>
<fo:list-item><fo:list-item-label><fo:block font-size="6pt" font-family="monospace" color="black" >1232</fo:block></fo:list-item-label>
<fo:list-item-body start-indent="30pt"><fo:block font-size="6pt" font-family="monospace" color="black" font-weight="normal">Malva mos</fo:block></fo:list-item-body></fo:list-item>
<fo:list-item><fo:list-item-label><fo:block font-size="6pt" font-family="monospace" color="black" >1236</fo:block></fo:list-item-label>
<fo:list-item-body start-indent="30pt"><fo:block font-size="6pt" font-family="monospace" color="black" text-indent="5pt" font-weight="normal">  syl</fo:block></fo:list-item-body></fo:list-item>
<fo:list-item><fo:list-item-label><fo:block font-size="6pt" font-family="monospace" color="black" >1239</fo:block></fo:list-item-label>
<fo:list-item-body start-indent="30pt"><fo:block font-size="6pt" font-family="monospace" color="black" font-weight="normal">Matri cha</fo:block></fo:list-item-body></fo:list-item>
<fo:list-item><fo:list-item-label><fo:block font-size="6pt" font-family="monospace" color="black" >1242</fo:block></fo:list-item-label>
<fo:list-item-body start-indent="30pt"><fo:block font-size="6pt" font-family="monospace" color="black" text-indent="5pt" font-weight="normal">  dis</fo:block></fo:list-item-body></fo:list-item>
<fo:list-item><fo:list-item-label><fo:block font-size="6pt" font-family="monospace" color="black" >1246</fo:block></fo:list-item-label>
<fo:list-item-body start-indent="30pt"><fo:block font-size="6pt" font-family="monospace" color="black" font-weight="normal">Mecon cam</fo:block></fo:list-item-body></fo:list-item>
<fo:list-item><fo:list-item-label><fo:block font-size="6pt" font-family="monospace" color="black" >1250</fo:block></fo:list-item-label>
<fo:list-item-body start-indent="30pt"><fo:block font-size="6pt" font-family="monospace" color="black" font-weight="normal">Medic lup</fo:block></fo:list-item-body></fo:list-item>
<fo:list-item><fo:list-item-label><fo:block font-size="6pt" font-family="monospace" color="black" >7129</fo:block></fo:list-item-label>
<fo:list-item-body start-indent="30pt"><fo:block font-size="6pt" font-family="monospace" color="black" text-indent="5pt" font-weight="normal">  sat</fo:block></fo:list-item-body></fo:list-item>
<fo:list-item><fo:list-item-label><fo:block font-size="6pt" font-family="monospace" color="black" >1256</fo:block></fo:list-item-label>
<fo:list-item-body start-indent="30pt"><fo:block font-size="6pt" font-family="monospace" color="black" font-weight="normal">Melam pra</fo:block></fo:list-item-body></fo:list-item>
<fo:list-item><fo:list-item-label><fo:block font-size="6pt" font-family="monospace" color="black" >1263</fo:block></fo:list-item-label>
<fo:list-item-body start-indent="30pt"><fo:block font-size="6pt" font-family="monospace" color="black" font-weight="normal">Melic uni</fo:block></fo:list-item-body></fo:list-item>
<fo:list-item><fo:list-item-label><fo:block font-size="6pt" font-family="monospace" color="black" >1265</fo:block></fo:list-item-label>
<fo:list-item-body start-indent="30pt"><fo:block font-size="6pt" font-family="monospace" color="black" font-weight="normal">Melil alt</fo:block></fo:list-item-body></fo:list-item>
<fo:list-item><fo:list-item-label><fo:block font-size="6pt" font-family="monospace" color="black" >1267</fo:block></fo:list-item-label>
<fo:list-item-body start-indent="30pt"><fo:block font-size="6pt" font-family="monospace" color="black" text-indent="5pt" font-weight="normal">  off</fo:block></fo:list-item-body></fo:list-item>
<fo:list-item><fo:list-item-label><fo:block font-size="6pt" font-family="monospace" color="black" >1272</fo:block></fo:list-item-label>
<fo:list-item-body start-indent="30pt"><fo:block font-size="6pt" font-family="monospace" color="black" font-weight="normal">Menth aqu</fo:block></fo:list-item-body></fo:list-item>
<fo:list-item><fo:list-item-label><fo:block font-size="6pt" font-family="monospace" color="black" >1285</fo:block></fo:list-item-label>
<fo:list-item-body start-indent="30pt"><fo:block font-size="6pt" font-family="monospace" color="black" text-indent="5pt" font-weight="normal">  spi</fo:block></fo:list-item-body></fo:list-item>
<fo:list-item><fo:list-item-label><fo:block font-size="6pt" font-family="monospace" color="black" >1289</fo:block></fo:list-item-label>
<fo:list-item-body start-indent="30pt"><fo:block font-size="6pt" font-family="monospace" color="black" font-weight="normal">Menya tri</fo:block></fo:list-item-body></fo:list-item>
<fo:list-item><fo:list-item-label><fo:block font-size="6pt" font-family="monospace" color="black" >1291</fo:block></fo:list-item-label>
<fo:list-item-body start-indent="30pt"><fo:block font-size="6pt" font-family="monospace" color="black" font-weight="normal">Mercu per</fo:block></fo:list-item-body></fo:list-item>
<fo:list-item><fo:list-item-label><fo:block font-size="6pt" font-family="monospace" color="black" >1296</fo:block></fo:list-item-label>
<fo:list-item-body start-indent="30pt"><fo:block font-size="6pt" font-family="monospace" color="black" font-weight="normal">Miliu eff</fo:block></fo:list-item-body></fo:list-item>
<fo:list-item><fo:list-item-label><fo:block font-size="6pt" font-family="monospace" color="black" >4328</fo:block></fo:list-item-label>
<fo:list-item-body start-indent="30pt"><fo:block font-size="6pt" font-family="monospace" color="black" font-weight="normal">Mimul gut</fo:block></fo:list-item-body></fo:list-item>
<fo:list-item><fo:list-item-label><fo:block font-size="6pt" font-family="monospace" color="black" >1305</fo:block></fo:list-item-label>
<fo:list-item-body start-indent="30pt"><fo:block font-size="6pt" font-family="monospace" color="black" font-weight="normal">Moehr tri</fo:block></fo:list-item-body></fo:list-item>
<fo:list-item><fo:list-item-label><fo:block font-size="6pt" font-family="monospace" color="black" >1307</fo:block></fo:list-item-label>
<fo:list-item-body start-indent="30pt"><fo:block font-size="6pt" font-family="monospace" color="black" font-weight="normal">Molin cae</fo:block></fo:list-item-body></fo:list-item>
<fo:list-item><fo:list-item-label><fo:block font-size="6pt" font-family="monospace" color="black" >1312</fo:block></fo:list-item-label>
<fo:list-item-body start-indent="30pt"><fo:block font-size="6pt" font-family="monospace" color="black" font-weight="normal">Monti fon</fo:block></fo:list-item-body></fo:list-item>
<fo:list-item><fo:list-item-label><fo:block font-size="6pt" font-family="monospace" color="black" >1315</fo:block></fo:list-item-label>
<fo:list-item-body start-indent="30pt"><fo:block font-size="6pt" font-family="monospace" color="black" font-weight="normal">Mycel mur</fo:block></fo:list-item-body></fo:list-item>
<fo:list-item><fo:list-item-label><fo:block font-size="6pt" font-family="monospace" color="black" >1317</fo:block></fo:list-item-label>
<fo:list-item-body start-indent="30pt"><fo:block font-size="6pt" font-family="monospace" color="black" font-weight="normal">Myoso arv</fo:block></fo:list-item-body></fo:list-item>
<fo:list-item><fo:list-item-label><fo:block font-size="6pt" font-family="monospace" color="black" >1321</fo:block></fo:list-item-label>
<fo:list-item-body start-indent="30pt"><fo:block font-size="6pt" font-family="monospace" color="black" text-indent="5pt" font-weight="normal">  disco</fo:block></fo:list-item-body></fo:list-item>
<fo:list-item><fo:list-item-label><fo:block font-size="6pt" font-family="monospace" color="black" >1319</fo:block></fo:list-item-label>
<fo:list-item-body start-indent="30pt"><fo:block font-size="6pt" font-family="monospace" color="black" text-indent="5pt" font-weight="normal">  lax</fo:block></fo:list-item-body></fo:list-item>
<fo:list-item><fo:list-item-label><fo:block font-size="6pt" font-family="monospace" color="black" >1322</fo:block></fo:list-item-label>
<fo:list-item-body start-indent="30pt"><fo:block font-size="6pt" font-family="monospace" color="black" text-indent="5pt" font-weight="normal">  sco</fo:block></fo:list-item-body></fo:list-item>
<fo:list-item><fo:list-item-label><fo:block font-size="6pt" font-family="monospace" color="black" >1325</fo:block></fo:list-item-label>
<fo:list-item-body start-indent="30pt"><fo:block font-size="6pt" font-family="monospace" color="black" text-indent="5pt" font-weight="normal">  syl</fo:block></fo:list-item-body></fo:list-item>
<fo:list-item><fo:list-item-label><fo:block font-size="6pt" font-family="monospace" color="black" >1331</fo:block></fo:list-item-label>
<fo:list-item-body start-indent="30pt"><fo:block font-size="6pt" font-family="monospace" color="black" font-weight="normal">Myrio spi</fo:block></fo:list-item-body></fo:list-item>
<fo:list-item><fo:list-item-label><fo:block font-size="6pt" font-family="monospace" color="black" >1333</fo:block></fo:list-item-label>
<fo:list-item-body start-indent="30pt"><fo:block font-size="6pt" font-family="monospace" color="black" font-weight="normal">Myrrh odo</fo:block></fo:list-item-body></fo:list-item>
<fo:list-item><fo:list-item-label><fo:block font-size="6pt" font-family="monospace" color="black" >2614</fo:block></fo:list-item-label>
<fo:list-item-body start-indent="30pt"><fo:block font-size="6pt" font-family="monospace" color="black" font-weight="normal">Narci*agg</fo:block></fo:list-item-body></fo:list-item>
<fo:list-item><fo:list-item-label><fo:block font-size="6pt" font-family="monospace" color="black" >1343</fo:block></fo:list-item-label>
<fo:list-item-body start-indent="30pt"><fo:block font-size="6pt" font-family="monospace" color="black" text-indent="5pt" font-weight="normal">  pse</fo:block></fo:list-item-body></fo:list-item>
<fo:list-item><fo:list-item-label><fo:block font-size="6pt" font-family="monospace" color="black" >1344</fo:block></fo:list-item-label>
<fo:list-item-body start-indent="30pt"><fo:block font-size="6pt" font-family="monospace" color="black" font-weight="normal">Nardu str</fo:block></fo:list-item-body></fo:list-item>
<fo:list-item><fo:list-item-label><fo:block font-size="6pt" font-family="monospace" color="black" >1348</fo:block></fo:list-item-label>
<fo:list-item-body start-indent="30pt"><fo:block font-size="6pt" font-family="monospace" color="black" font-weight="normal">Nastu*off</fo:block></fo:list-item-body></fo:list-item>
<fo:list-item><fo:list-item-label><fo:block font-size="6pt" font-family="monospace" color="black" >1347</fo:block></fo:list-item-label>
<fo:list-item-body start-indent="30pt"><fo:block font-size="6pt" font-family="monospace" color="black" text-indent="5pt" font-weight="normal">  off</fo:block></fo:list-item-body></fo:list-item>
<fo:list-item><fo:list-item-label><fo:block font-size="6pt" font-family="monospace" color="black" >1173</fo:block></fo:list-item-label>
<fo:list-item-body start-indent="30pt"><fo:block font-size="6pt" font-family="monospace" color="black" font-weight="normal">Neott ova</fo:block></fo:list-item-body></fo:list-item>
<fo:list-item><fo:list-item-label><fo:block font-size="6pt" font-family="monospace" color="black" >1358</fo:block></fo:list-item-label>
<fo:list-item-body start-indent="30pt"><fo:block font-size="6pt" font-family="monospace" color="black" font-weight="normal">Nymph alb</fo:block></fo:list-item-body></fo:list-item>
<fo:list-item><fo:list-item-label><fo:block font-size="6pt" font-family="monospace" color="black" >1361</fo:block></fo:list-item-label>
<fo:list-item-body start-indent="30pt"><fo:block font-size="6pt" font-family="monospace" color="black" font-weight="normal">Odont ver</fo:block></fo:list-item-body></fo:list-item>
<fo:list-item><fo:list-item-label><fo:block font-size="6pt" font-family="monospace" color="black" >1363</fo:block></fo:list-item-label>
<fo:list-item-body start-indent="30pt"><fo:block font-size="6pt" font-family="monospace" color="black" font-weight="normal">Oenan cro</fo:block></fo:list-item-body></fo:list-item>
<fo:list-item><fo:list-item-label><fo:block font-size="6pt" font-family="monospace" color="black" >1377</fo:block></fo:list-item-label>
<fo:list-item-body start-indent="30pt"><fo:block font-size="6pt" font-family="monospace" color="black" font-weight="normal">Ononi rep</fo:block></fo:list-item-body></fo:list-item>
<fo:list-item><fo:list-item-label><fo:block font-size="6pt" font-family="monospace" color="black" >1381.2</fo:block></fo:list-item-label>
<fo:list-item-body start-indent="30pt"><fo:block font-size="6pt" font-family="monospace" color="black" font-weight="normal">Ophio vul</fo:block></fo:list-item-body></fo:list-item>
<fo:list-item><fo:list-item-label><fo:block font-size="6pt" font-family="monospace" color="black" >1382</fo:block></fo:list-item-label>
<fo:list-item-body start-indent="30pt"><fo:block font-size="6pt" font-family="monospace" color="black" font-weight="normal">Ophry api</fo:block></fo:list-item-body></fo:list-item>
<fo:list-item><fo:list-item-label><fo:block font-size="6pt" font-family="monospace" color="black" >1387</fo:block></fo:list-item-label>
<fo:list-item-body start-indent="30pt"><fo:block font-size="6pt" font-family="monospace" color="black" font-weight="normal">Orchi mas</fo:block></fo:list-item-body></fo:list-item>
<fo:list-item><fo:list-item-label><fo:block font-size="6pt" font-family="monospace" color="black" >2051</fo:block></fo:list-item-label>
<fo:list-item-body start-indent="30pt"><fo:block font-size="6pt" font-family="monospace" color="black" font-weight="normal">Oreop lim</fo:block></fo:list-item-body></fo:list-item>
<fo:list-item><fo:list-item-label><fo:block font-size="6pt" font-family="monospace" color="black" >1393</fo:block></fo:list-item-label>
<fo:list-item-body start-indent="30pt"><fo:block font-size="6pt" font-family="monospace" color="black" font-weight="normal">Origa vul</fo:block></fo:list-item-body></fo:list-item>
<fo:list-item><fo:list-item-label><fo:block font-size="6pt" font-family="monospace" color="black" >1413</fo:block></fo:list-item-label>
<fo:list-item-body start-indent="30pt"><fo:block font-size="6pt" font-family="monospace" color="black" font-weight="normal">Oxali ace</fo:block></fo:list-item-body></fo:list-item>
<fo:list-item><fo:list-item-label><fo:block font-size="6pt" font-family="monospace" color="black" >1426</fo:block></fo:list-item-label>
<fo:list-item-body start-indent="30pt"><fo:block font-size="6pt" font-family="monospace" color="black" font-weight="normal">Papav dub</fo:block></fo:list-item-body></fo:list-item>
<fo:list-item><fo:list-item-label><fo:block font-size="6pt" font-family="monospace" color="black" >7046</fo:block></fo:list-item-label>
<fo:list-item-body start-indent="30pt"><fo:block font-size="6pt" font-family="monospace" color="black" text-indent="5pt" font-weight="normal">  *dub</fo:block></fo:list-item-body></fo:list-item>
<fo:list-item><fo:list-item-label><fo:block font-size="6pt" font-family="monospace" color="black" >1430</fo:block></fo:list-item-label>
<fo:list-item-body start-indent="30pt"><fo:block font-size="6pt" font-family="monospace" color="black" text-indent="5pt" font-weight="normal">  rho</fo:block></fo:list-item-body></fo:list-item>
<fo:list-item><fo:list-item-label><fo:block font-size="6pt" font-family="monospace" color="black" >1431</fo:block></fo:list-item-label>
<fo:list-item-body start-indent="30pt"><fo:block font-size="6pt" font-family="monospace" color="black" text-indent="5pt" font-weight="normal">  som</fo:block></fo:list-item-body></fo:list-item>
<fo:list-item><fo:list-item-label><fo:block font-size="6pt" font-family="monospace" color="black" >1440</fo:block></fo:list-item-label>
<fo:list-item-body start-indent="30pt"><fo:block font-size="6pt" font-family="monospace" color="black" font-weight="normal">Pasti sat</fo:block></fo:list-item-body></fo:list-item>
<fo:list-item><fo:list-item-label><fo:block font-size="6pt" font-family="monospace" color="black" >1443</fo:block></fo:list-item-label>
<fo:list-item-body start-indent="30pt"><fo:block font-size="6pt" font-family="monospace" color="black" font-weight="normal">Penta sem</fo:block></fo:list-item-body></fo:list-item>
<fo:list-item><fo:list-item-label><fo:block font-size="6pt" font-family="monospace" color="black" >1521</fo:block></fo:list-item-label>
<fo:list-item-body start-indent="30pt"><fo:block font-size="6pt" font-family="monospace" color="black" font-weight="normal">Persi amph</fo:block></fo:list-item-body></fo:list-item>
<fo:list-item><fo:list-item-label><fo:block font-size="6pt" font-family="monospace" color="black" >1525</fo:block></fo:list-item-label>
<fo:list-item-body start-indent="30pt"><fo:block font-size="6pt" font-family="monospace" color="black" text-indent="5pt" font-weight="normal">  bis</fo:block></fo:list-item-body></fo:list-item>
<fo:list-item><fo:list-item-label><fo:block font-size="6pt" font-family="monospace" color="black" >1537</fo:block></fo:list-item-label>
<fo:list-item-body start-indent="30pt"><fo:block font-size="6pt" font-family="monospace" color="black" text-indent="5pt" font-weight="normal">  mac</fo:block></fo:list-item-body></fo:list-item>
<fo:list-item><fo:list-item-label><fo:block font-size="6pt" font-family="monospace" color="black" >1447</fo:block></fo:list-item-label>
<fo:list-item-body start-indent="30pt"><fo:block font-size="6pt" font-family="monospace" color="black" font-weight="normal">Petas hyb</fo:block></fo:list-item-body></fo:list-item>
<fo:list-item><fo:list-item-label><fo:block font-size="6pt" font-family="monospace" color="black" >1454</fo:block></fo:list-item-label>
<fo:list-item-body start-indent="30pt"><fo:block font-size="6pt" font-family="monospace" color="black" font-weight="normal">Phala aru</fo:block></fo:list-item-body></fo:list-item>
<fo:list-item><fo:list-item-label><fo:block font-size="6pt" font-family="monospace" color="black" >1461</fo:block></fo:list-item-label>
<fo:list-item-body start-indent="30pt"><fo:block font-size="6pt" font-family="monospace" color="black" font-weight="normal">Phleu ber</fo:block></fo:list-item-body></fo:list-item>
<fo:list-item><fo:list-item-label><fo:block font-size="6pt" font-family="monospace" color="black" >1463</fo:block></fo:list-item-label>
<fo:list-item-body start-indent="30pt"><fo:block font-size="6pt" font-family="monospace" color="black" text-indent="5pt" font-weight="normal">  pra</fo:block></fo:list-item-body></fo:list-item>
<fo:list-item><fo:list-item-label><fo:block font-size="6pt" font-family="monospace" color="black" >2247</fo:block></fo:list-item-label>
<fo:list-item-body start-indent="30pt"><fo:block font-size="6pt" font-family="monospace" color="black" text-indent="5pt" font-weight="normal">  *pra</fo:block></fo:list-item-body></fo:list-item>
<fo:list-item><fo:list-item-label><fo:block font-size="6pt" font-family="monospace" color="black" >1465</fo:block></fo:list-item-label>
<fo:list-item-body start-indent="30pt"><fo:block font-size="6pt" font-family="monospace" color="black" font-weight="normal">Phrag aus</fo:block></fo:list-item-body></fo:list-item>
<fo:list-item><fo:list-item-label><fo:block font-size="6pt" font-family="monospace" color="black" >1470</fo:block></fo:list-item-label>
<fo:list-item-body start-indent="30pt"><fo:block font-size="6pt" font-family="monospace" color="black" font-weight="normal">Picea abi</fo:block></fo:list-item-body></fo:list-item>
<fo:list-item><fo:list-item-label><fo:block font-size="6pt" font-family="monospace" color="black" >2401</fo:block></fo:list-item-label>
<fo:list-item-body start-indent="30pt"><fo:block font-size="6pt" font-family="monospace" color="black" text-indent="5pt" font-weight="normal">  sit</fo:block></fo:list-item-body></fo:list-item>
<fo:list-item><fo:list-item-label><fo:block font-size="6pt" font-family="monospace" color="black" >4516</fo:block></fo:list-item-label>
<fo:list-item-body start-indent="30pt"><fo:block font-size="6pt" font-family="monospace" color="black" font-weight="normal">Pilos aur</fo:block></fo:list-item-body></fo:list-item>
<fo:list-item><fo:list-item-label><fo:block font-size="6pt" font-family="monospace" color="black" >976</fo:block></fo:list-item-label>
<fo:list-item-body start-indent="30pt"><fo:block font-size="6pt" font-family="monospace" color="black" text-indent="5pt" font-weight="normal">  off</fo:block></fo:list-item-body></fo:list-item>
<fo:list-item><fo:list-item-label><fo:block font-size="6pt" font-family="monospace" color="black" >1476</fo:block></fo:list-item-label>
<fo:list-item-body start-indent="30pt"><fo:block font-size="6pt" font-family="monospace" color="black" font-weight="normal">Pimpi sax</fo:block></fo:list-item-body></fo:list-item>
<fo:list-item><fo:list-item-label><fo:block font-size="6pt" font-family="monospace" color="black" >1481</fo:block></fo:list-item-label>
<fo:list-item-body start-indent="30pt"><fo:block font-size="6pt" font-family="monospace" color="black" font-weight="normal">Pingu vul</fo:block></fo:list-item-body></fo:list-item>
<fo:list-item><fo:list-item-label><fo:block font-size="6pt" font-family="monospace" color="black" >1482</fo:block></fo:list-item-label>
<fo:list-item-body start-indent="30pt"><fo:block font-size="6pt" font-family="monospace" color="black" font-weight="normal">Pinus nig</fo:block></fo:list-item-body></fo:list-item>
<fo:list-item><fo:list-item-label><fo:block font-size="6pt" font-family="monospace" color="black" >1484</fo:block></fo:list-item-label>
<fo:list-item-body start-indent="30pt"><fo:block font-size="6pt" font-family="monospace" color="black" text-indent="5pt" font-weight="normal">  syl</fo:block></fo:list-item-body></fo:list-item>
<fo:list-item><fo:list-item-label><fo:block font-size="6pt" font-family="monospace" color="black" >1485</fo:block></fo:list-item-label>
<fo:list-item-body start-indent="30pt"><fo:block font-size="6pt" font-family="monospace" color="black" font-weight="normal">Plant cor</fo:block></fo:list-item-body></fo:list-item>
<fo:list-item><fo:list-item-label><fo:block font-size="6pt" font-family="monospace" color="black" >1487</fo:block></fo:list-item-label>
<fo:list-item-body start-indent="30pt"><fo:block font-size="6pt" font-family="monospace" color="black" text-indent="5pt" font-weight="normal">  lan</fo:block></fo:list-item-body></fo:list-item>
<fo:list-item><fo:list-item-label><fo:block font-size="6pt" font-family="monospace" color="black" >1488</fo:block></fo:list-item-label>
<fo:list-item-body start-indent="30pt"><fo:block font-size="6pt" font-family="monospace" color="black" text-indent="5pt" font-weight="normal">  maj</fo:block></fo:list-item-body></fo:list-item>
<fo:list-item><fo:list-item-label><fo:block font-size="6pt" font-family="monospace" color="black" >1489</fo:block></fo:list-item-label>
<fo:list-item-body start-indent="30pt"><fo:block font-size="6pt" font-family="monospace" color="black" text-indent="5pt" font-weight="normal">  mar</fo:block></fo:list-item-body></fo:list-item>
<fo:list-item><fo:list-item-label><fo:block font-size="6pt" font-family="monospace" color="black" >1490</fo:block></fo:list-item-label>
<fo:list-item-body start-indent="30pt"><fo:block font-size="6pt" font-family="monospace" color="black" text-indent="5pt" font-weight="normal">  med</fo:block></fo:list-item-body></fo:list-item>
<fo:list-item><fo:list-item-label><fo:block font-size="6pt" font-family="monospace" color="black" >1495</fo:block></fo:list-item-label>
<fo:list-item-body start-indent="30pt"><fo:block font-size="6pt" font-family="monospace" color="black" font-weight="normal">Poa ann</fo:block></fo:list-item-body></fo:list-item>
<fo:list-item><fo:list-item-label><fo:block font-size="6pt" font-family="monospace" color="black" >1506.5</fo:block></fo:list-item-label>
<fo:list-item-body start-indent="30pt"><fo:block font-size="6pt" font-family="monospace" color="black" text-indent="5pt" font-weight="normal">  hum</fo:block></fo:list-item-body></fo:list-item>
<fo:list-item><fo:list-item-label><fo:block font-size="6pt" font-family="monospace" color="black" >1504</fo:block></fo:list-item-label>
<fo:list-item-body start-indent="30pt"><fo:block font-size="6pt" font-family="monospace" color="black" text-indent="5pt" font-weight="normal">  nem</fo:block></fo:list-item-body></fo:list-item>
<fo:list-item><fo:list-item-label><fo:block font-size="6pt" font-family="monospace" color="black" >1506</fo:block></fo:list-item-label>
<fo:list-item-body start-indent="30pt"><fo:block font-size="6pt" font-family="monospace" color="black" text-indent="5pt" font-weight="normal">  *pra</fo:block></fo:list-item-body></fo:list-item>
<fo:list-item><fo:list-item-label><fo:block font-size="6pt" font-family="monospace" color="black" >1506.4</fo:block></fo:list-item-label>
<fo:list-item-body start-indent="30pt"><fo:block font-size="6pt" font-family="monospace" color="black" text-indent="5pt" font-weight="normal">  pra</fo:block></fo:list-item-body></fo:list-item>
<fo:list-item><fo:list-item-label><fo:block font-size="6pt" font-family="monospace" color="black" >1507</fo:block></fo:list-item-label>
<fo:list-item-body start-indent="30pt"><fo:block font-size="6pt" font-family="monospace" color="black" text-indent="5pt" font-weight="normal">  tri</fo:block></fo:list-item-body></fo:list-item>
<fo:list-item><fo:list-item-label><fo:block font-size="6pt" font-family="monospace" color="black" >1514</fo:block></fo:list-item-label>
<fo:list-item-body start-indent="30pt"><fo:block font-size="6pt" font-family="monospace" color="black" font-weight="normal">Polyg ser</fo:block></fo:list-item-body></fo:list-item>
<fo:list-item><fo:list-item-label><fo:block font-size="6pt" font-family="monospace" color="black" >1515</fo:block></fo:list-item-label>
<fo:list-item-body start-indent="30pt"><fo:block font-size="6pt" font-family="monospace" color="black" text-indent="5pt" font-weight="normal">  vul</fo:block></fo:list-item-body></fo:list-item>
<fo:list-item><fo:list-item-label><fo:block font-size="6pt" font-family="monospace" color="black" >1523</fo:block></fo:list-item-label>
<fo:list-item-body start-indent="30pt"><fo:block font-size="6pt" font-family="monospace" color="black" font-weight="normal">Polyg avi</fo:block></fo:list-item-body></fo:list-item>
<fo:list-item><fo:list-item-label><fo:block font-size="6pt" font-family="monospace" color="black" >1522</fo:block></fo:list-item-label>
<fo:list-item-body start-indent="30pt"><fo:block font-size="6pt" font-family="monospace" color="black" text-indent="5pt" font-weight="normal">  *avi</fo:block></fo:list-item-body></fo:list-item>
<fo:list-item><fo:list-item-label><fo:block font-size="6pt" font-family="monospace" color="black" >1544.2</fo:block></fo:list-item-label>
<fo:list-item-body start-indent="30pt"><fo:block font-size="6pt" font-family="monospace" color="black" font-weight="normal">Polyp vul</fo:block></fo:list-item-body></fo:list-item>
<fo:list-item><fo:list-item-label><fo:block font-size="6pt" font-family="monospace" color="black" >1544</fo:block></fo:list-item-label>
<fo:list-item-body start-indent="30pt"><fo:block font-size="6pt" font-family="monospace" color="black" text-indent="5pt" font-weight="normal">  *vul</fo:block></fo:list-item-body></fo:list-item>
<fo:list-item><fo:list-item-label><fo:block font-size="6pt" font-family="monospace" color="black" >1546</fo:block></fo:list-item-label>
<fo:list-item-body start-indent="30pt"><fo:block font-size="6pt" font-family="monospace" color="black" font-weight="normal">Polys acu</fo:block></fo:list-item-body></fo:list-item>
<fo:list-item><fo:list-item-label><fo:block font-size="6pt" font-family="monospace" color="black" >1548</fo:block></fo:list-item-label>
<fo:list-item-body start-indent="30pt"><fo:block font-size="6pt" font-family="monospace" color="black" text-indent="5pt" font-weight="normal">  set</fo:block></fo:list-item-body></fo:list-item>
<fo:list-item><fo:list-item-label><fo:block font-size="6pt" font-family="monospace" color="black" >1549</fo:block></fo:list-item-label>
<fo:list-item-body start-indent="30pt"><fo:block font-size="6pt" font-family="monospace" color="black" font-weight="normal">Popul alb</fo:block></fo:list-item-body></fo:list-item>
<fo:list-item><fo:list-item-label><fo:block font-size="6pt" font-family="monospace" color="black" >4313</fo:block></fo:list-item-label>
<fo:list-item-body start-indent="30pt"><fo:block font-size="6pt" font-family="monospace" color="black" text-indent="5pt" font-weight="normal">  nig</fo:block></fo:list-item-body></fo:list-item>
<fo:list-item><fo:list-item-label><fo:block font-size="6pt" font-family="monospace" color="black" >1553</fo:block></fo:list-item-label>
<fo:list-item-body start-indent="30pt"><fo:block font-size="6pt" font-family="monospace" color="black" text-indent="5pt" font-weight="normal">  nig 'Ita'</fo:block></fo:list-item-body></fo:list-item>
<fo:list-item><fo:list-item-label><fo:block font-size="6pt" font-family="monospace" color="black" >1555</fo:block></fo:list-item-label>
<fo:list-item-body start-indent="30pt"><fo:block font-size="6pt" font-family="monospace" color="black" text-indent="5pt" font-weight="normal">  tre</fo:block></fo:list-item-body></fo:list-item>
<fo:list-item><fo:list-item-label><fo:block font-size="6pt" font-family="monospace" color="black" >1550</fo:block></fo:list-item-label>
<fo:list-item-body start-indent="30pt"><fo:block font-size="6pt" font-family="monospace" color="black" text-indent="5pt" font-weight="normal">  x cana</fo:block></fo:list-item-body></fo:list-item>
<fo:list-item><fo:list-item-label><fo:block font-size="6pt" font-family="monospace" color="black" >1551</fo:block></fo:list-item-label>
<fo:list-item-body start-indent="30pt"><fo:block font-size="6pt" font-family="monospace" color="black" text-indent="5pt" font-weight="normal">  x cane</fo:block></fo:list-item-body></fo:list-item>
<fo:list-item><fo:list-item-label><fo:block font-size="6pt" font-family="monospace" color="black" >1563</fo:block></fo:list-item-label>
<fo:list-item-body start-indent="30pt"><fo:block font-size="6pt" font-family="monospace" color="black" font-weight="normal">Potam cri</fo:block></fo:list-item-body></fo:list-item>
<fo:list-item><fo:list-item-label><fo:block font-size="6pt" font-family="monospace" color="black" >1570</fo:block></fo:list-item-label>
<fo:list-item-body start-indent="30pt"><fo:block font-size="6pt" font-family="monospace" color="black" text-indent="5pt" font-weight="normal">  nat</fo:block></fo:list-item-body></fo:list-item>
<fo:list-item><fo:list-item-label><fo:block font-size="6pt" font-family="monospace" color="black" >1574</fo:block></fo:list-item-label>
<fo:list-item-body start-indent="30pt"><fo:block font-size="6pt" font-family="monospace" color="black" text-indent="5pt" font-weight="normal">  pec</fo:block></fo:list-item-body></fo:list-item>
<fo:list-item><fo:list-item-label><fo:block font-size="6pt" font-family="monospace" color="black" >1576</fo:block></fo:list-item-label>
<fo:list-item-body start-indent="30pt"><fo:block font-size="6pt" font-family="monospace" color="black" text-indent="5pt" font-weight="normal">  pol</fo:block></fo:list-item-body></fo:list-item>
<fo:list-item><fo:list-item-label><fo:block font-size="6pt" font-family="monospace" color="black" >1584</fo:block></fo:list-item-label>
<fo:list-item-body start-indent="30pt"><fo:block font-size="6pt" font-family="monospace" color="black" font-weight="normal">Poten ans</fo:block></fo:list-item-body></fo:list-item>
<fo:list-item><fo:list-item-label><fo:block font-size="6pt" font-family="monospace" color="black" >1588</fo:block></fo:list-item-label>
<fo:list-item-body start-indent="30pt"><fo:block font-size="6pt" font-family="monospace" color="black" text-indent="5pt" font-weight="normal">  ere</fo:block></fo:list-item-body></fo:list-item>
<fo:list-item><fo:list-item-label><fo:block font-size="6pt" font-family="monospace" color="black" >1594</fo:block></fo:list-item-label>
<fo:list-item-body start-indent="30pt"><fo:block font-size="6pt" font-family="monospace" color="black" text-indent="5pt" font-weight="normal">  rep</fo:block></fo:list-item-body></fo:list-item>
<fo:list-item><fo:list-item-label><fo:block font-size="6pt" font-family="monospace" color="black" >1596</fo:block></fo:list-item-label>
<fo:list-item-body start-indent="30pt"><fo:block font-size="6pt" font-family="monospace" color="black" text-indent="5pt" font-weight="normal">  ste</fo:block></fo:list-item-body></fo:list-item>
<fo:list-item><fo:list-item-label><fo:block font-size="6pt" font-family="monospace" color="black" >5442</fo:block></fo:list-item-label>
<fo:list-item-body start-indent="30pt"><fo:block font-size="6pt" font-family="monospace" color="black" font-weight="normal">Poter san</fo:block></fo:list-item-body></fo:list-item>
<fo:list-item><fo:list-item-label><fo:block font-size="6pt" font-family="monospace" color="black" >1599</fo:block></fo:list-item-label>
<fo:list-item-body start-indent="30pt"><fo:block font-size="6pt" font-family="monospace" color="black" text-indent="5pt" font-weight="normal">  san san</fo:block></fo:list-item-body></fo:list-item>
<fo:list-item><fo:list-item-label><fo:block font-size="6pt" font-family="monospace" color="black" >1605</fo:block></fo:list-item-label>
<fo:list-item-body start-indent="30pt"><fo:block font-size="6pt" font-family="monospace" color="black" font-weight="normal">Primu ver</fo:block></fo:list-item-body></fo:list-item>
<fo:list-item><fo:list-item-label><fo:block font-size="6pt" font-family="monospace" color="black" >1607</fo:block></fo:list-item-label>
<fo:list-item-body start-indent="30pt"><fo:block font-size="6pt" font-family="monospace" color="black" text-indent="5pt" font-weight="normal">  vul</fo:block></fo:list-item-body></fo:list-item>
<fo:list-item><fo:list-item-label><fo:block font-size="6pt" font-family="monospace" color="black" >1610</fo:block></fo:list-item-label>
<fo:list-item-body start-indent="30pt"><fo:block font-size="6pt" font-family="monospace" color="black" font-weight="normal">Prune vul</fo:block></fo:list-item-body></fo:list-item>
<fo:list-item><fo:list-item-label><fo:block font-size="6pt" font-family="monospace" color="black" >1611</fo:block></fo:list-item-label>
<fo:list-item-body start-indent="30pt"><fo:block font-size="6pt" font-family="monospace" color="black" font-weight="normal">Prunu avi</fo:block></fo:list-item-body></fo:list-item>
<fo:list-item><fo:list-item-label><fo:block font-size="6pt" font-family="monospace" color="black" >1612</fo:block></fo:list-item-label>
<fo:list-item-body start-indent="30pt"><fo:block font-size="6pt" font-family="monospace" color="black" text-indent="5pt" font-weight="normal">  cer..ra</fo:block></fo:list-item-body></fo:list-item>
<fo:list-item><fo:list-item-label><fo:block font-size="6pt" font-family="monospace" color="black" >1614</fo:block></fo:list-item-label>
<fo:list-item-body start-indent="30pt"><fo:block font-size="6pt" font-family="monospace" color="black" text-indent="5pt" font-weight="normal">  dom</fo:block></fo:list-item-body></fo:list-item>
<fo:list-item><fo:list-item-label><fo:block font-size="6pt" font-family="monospace" color="black" >1615</fo:block></fo:list-item-label>
<fo:list-item-body start-indent="30pt"><fo:block font-size="6pt" font-family="monospace" color="black" text-indent="5pt" font-weight="normal">  lau</fo:block></fo:list-item-body></fo:list-item>
<fo:list-item><fo:list-item-label><fo:block font-size="6pt" font-family="monospace" color="black" >1616</fo:block></fo:list-item-label>
<fo:list-item-body start-indent="30pt"><fo:block font-size="6pt" font-family="monospace" color="black" text-indent="5pt" font-weight="normal">  pad</fo:block></fo:list-item-body></fo:list-item>
<fo:list-item><fo:list-item-label><fo:block font-size="6pt" font-family="monospace" color="black" >1617</fo:block></fo:list-item-label>
<fo:list-item-body start-indent="30pt"><fo:block font-size="6pt" font-family="monospace" color="black" text-indent="5pt" font-weight="normal">  spi</fo:block></fo:list-item-body></fo:list-item>
<fo:list-item><fo:list-item-label><fo:block font-size="6pt" font-family="monospace" color="black" >556</fo:block></fo:list-item-label>
<fo:list-item-body start-indent="30pt"><fo:block font-size="6pt" font-family="monospace" color="black" font-weight="normal">Pseud lut</fo:block></fo:list-item-body></fo:list-item>
<fo:list-item><fo:list-item-label><fo:block font-size="6pt" font-family="monospace" color="black" >1619</fo:block></fo:list-item-label>
<fo:list-item-body start-indent="30pt"><fo:block font-size="6pt" font-family="monospace" color="black" font-weight="normal">Pterid aqu</fo:block></fo:list-item-body></fo:list-item>
<fo:list-item><fo:list-item-label><fo:block font-size="6pt" font-family="monospace" color="black" >1620</fo:block></fo:list-item-label>
<fo:list-item-body start-indent="30pt"><fo:block font-size="6pt" font-family="monospace" color="black" font-weight="normal">Pucci dis</fo:block></fo:list-item-body></fo:list-item>
<fo:list-item><fo:list-item-label><fo:block font-size="6pt" font-family="monospace" color="black" >1625</fo:block></fo:list-item-label>
<fo:list-item-body start-indent="30pt"><fo:block font-size="6pt" font-family="monospace" color="black" font-weight="normal">Pulic dys</fo:block></fo:list-item-body></fo:list-item>
<fo:list-item><fo:list-item-label><fo:block font-size="6pt" font-family="monospace" color="black" >1635</fo:block></fo:list-item-label>
<fo:list-item-body start-indent="30pt"><fo:block font-size="6pt" font-family="monospace" color="black" font-weight="normal">Querc cer</fo:block></fo:list-item-body></fo:list-item>
<fo:list-item><fo:list-item-label><fo:block font-size="6pt" font-family="monospace" color="black" >1638</fo:block></fo:list-item-label>
<fo:list-item-body start-indent="30pt"><fo:block font-size="6pt" font-family="monospace" color="black" text-indent="5pt" font-weight="normal">  pet</fo:block></fo:list-item-body></fo:list-item>
<fo:list-item><fo:list-item-label><fo:block font-size="6pt" font-family="monospace" color="black" >1640</fo:block></fo:list-item-label>
<fo:list-item-body start-indent="30pt"><fo:block font-size="6pt" font-family="monospace" color="black" text-indent="5pt" font-weight="normal">  rob</fo:block></fo:list-item-body></fo:list-item>
<fo:list-item><fo:list-item-label><fo:block font-size="6pt" font-family="monospace" color="black" >1639</fo:block></fo:list-item-label>
<fo:list-item-body start-indent="30pt"><fo:block font-size="6pt" font-family="monospace" color="black" text-indent="5pt" font-weight="normal">  x ros</fo:block></fo:list-item-body></fo:list-item>
<fo:list-item><fo:list-item-label><fo:block font-size="6pt" font-family="monospace" color="black" >1642</fo:block></fo:list-item-label>
<fo:list-item-body start-indent="30pt"><fo:block font-size="6pt" font-family="monospace" color="black" font-weight="normal">Ranun acr</fo:block></fo:list-item-body></fo:list-item>
<fo:list-item><fo:list-item-label><fo:block font-size="6pt" font-family="monospace" color="black" >1643.1</fo:block></fo:list-item-label>
<fo:list-item-body start-indent="30pt"><fo:block font-size="6pt" font-family="monospace" color="black" text-indent="5pt" font-weight="normal">  aqu</fo:block></fo:list-item-body></fo:list-item>
<fo:list-item><fo:list-item-label><fo:block font-size="6pt" font-family="monospace" color="black" >1645</fo:block></fo:list-item-label>
<fo:list-item-body start-indent="30pt"><fo:block font-size="6pt" font-family="monospace" color="black" text-indent="5pt" font-weight="normal">  aur</fo:block></fo:list-item-body></fo:list-item>
<fo:list-item><fo:list-item-label><fo:block font-size="6pt" font-family="monospace" color="black" >1647</fo:block></fo:list-item-label>
<fo:list-item-body start-indent="30pt"><fo:block font-size="6pt" font-family="monospace" color="black" text-indent="5pt" font-weight="normal">  bul</fo:block></fo:list-item-body></fo:list-item>
<fo:list-item><fo:list-item-label><fo:block font-size="6pt" font-family="monospace" color="black" >1651</fo:block></fo:list-item-label>
<fo:list-item-body start-indent="30pt"><fo:block font-size="6pt" font-family="monospace" color="black" text-indent="5pt" font-weight="normal">  fla</fo:block></fo:list-item-body></fo:list-item>
<fo:list-item><fo:list-item-label><fo:block font-size="6pt" font-family="monospace" color="black" >1655</fo:block></fo:list-item-label>
<fo:list-item-body start-indent="30pt"><fo:block font-size="6pt" font-family="monospace" color="black" text-indent="5pt" font-weight="normal">  lin</fo:block></fo:list-item-body></fo:list-item>
<fo:list-item><fo:list-item-label><fo:block font-size="6pt" font-family="monospace" color="black" >1660</fo:block></fo:list-item-label>
<fo:list-item-body start-indent="30pt"><fo:block font-size="6pt" font-family="monospace" color="black" text-indent="5pt" font-weight="normal">  repens</fo:block></fo:list-item-body></fo:list-item>
<fo:list-item><fo:list-item-label><fo:block font-size="6pt" font-family="monospace" color="black" >1663</fo:block></fo:list-item-label>
<fo:list-item-body start-indent="30pt"><fo:block font-size="6pt" font-family="monospace" color="black" text-indent="5pt" font-weight="normal">  sce</fo:block></fo:list-item-body></fo:list-item>
<fo:list-item><fo:list-item-label><fo:block font-size="6pt" font-family="monospace" color="black" >5439</fo:block></fo:list-item-label>
<fo:list-item-body start-indent="30pt"><fo:block font-size="6pt" font-family="monospace" color="black" text-indent="5pt" font-weight="normal">  subg. Bat</fo:block></fo:list-item-body></fo:list-item>
<fo:list-item><fo:list-item-label><fo:block font-size="6pt" font-family="monospace" color="black" >1672</fo:block></fo:list-item-label>
<fo:list-item-body start-indent="30pt"><fo:block font-size="6pt" font-family="monospace" color="black" font-weight="normal">Resed lutea</fo:block></fo:list-item-body></fo:list-item>
<fo:list-item><fo:list-item-label><fo:block font-size="6pt" font-family="monospace" color="black" >1673</fo:block></fo:list-item-label>
<fo:list-item-body start-indent="30pt"><fo:block font-size="6pt" font-family="monospace" color="black" text-indent="5pt" font-weight="normal">  luteola</fo:block></fo:list-item-body></fo:list-item>
<fo:list-item><fo:list-item-label><fo:block font-size="6pt" font-family="monospace" color="black" >1678</fo:block></fo:list-item-label>
<fo:list-item-body start-indent="30pt"><fo:block font-size="6pt" font-family="monospace" color="black" font-weight="normal">Rhina min</fo:block></fo:list-item-body></fo:list-item>
<fo:list-item><fo:list-item-label><fo:block font-size="6pt" font-family="monospace" color="black" >1687</fo:block></fo:list-item-label>
<fo:list-item-body start-indent="30pt"><fo:block font-size="6pt" font-family="monospace" color="black" font-weight="normal">Rhodo pon</fo:block></fo:list-item-body></fo:list-item>
<fo:list-item><fo:list-item-label><fo:block font-size="6pt" font-family="monospace" color="black" >1694</fo:block></fo:list-item-label>
<fo:list-item-body start-indent="30pt"><fo:block font-size="6pt" font-family="monospace" color="black" font-weight="normal">Ribes nig</fo:block></fo:list-item-body></fo:list-item>
<fo:list-item><fo:list-item-label><fo:block font-size="6pt" font-family="monospace" color="black" >1696</fo:block></fo:list-item-label>
<fo:list-item-body start-indent="30pt"><fo:block font-size="6pt" font-family="monospace" color="black" text-indent="5pt" font-weight="normal">  rub</fo:block></fo:list-item-body></fo:list-item>
<fo:list-item><fo:list-item-label><fo:block font-size="6pt" font-family="monospace" color="black" >2433</fo:block></fo:list-item-label>
<fo:list-item-body start-indent="30pt"><fo:block font-size="6pt" font-family="monospace" color="black" text-indent="5pt" font-weight="normal">  san</fo:block></fo:list-item-body></fo:list-item>
<fo:list-item><fo:list-item-label><fo:block font-size="6pt" font-family="monospace" color="black" >1697</fo:block></fo:list-item-label>
<fo:list-item-body start-indent="30pt"><fo:block font-size="6pt" font-family="monospace" color="black" text-indent="5pt" font-weight="normal">  uva</fo:block></fo:list-item-body></fo:list-item>
<fo:list-item><fo:list-item-label><fo:block font-size="6pt" font-family="monospace" color="black" >1704</fo:block></fo:list-item-label>
<fo:list-item-body start-indent="30pt"><fo:block font-size="6pt" font-family="monospace" color="black" font-weight="normal">Rorip syl</fo:block></fo:list-item-body></fo:list-item>
<fo:list-item><fo:list-item-label><fo:block font-size="6pt" font-family="monospace" color="black" >7533</fo:block></fo:list-item-label>
<fo:list-item-body start-indent="30pt"><fo:block font-size="6pt" font-family="monospace" color="black" font-weight="normal">Rosa cae</fo:block></fo:list-item-body></fo:list-item>
<fo:list-item><fo:list-item-label><fo:block font-size="6pt" font-family="monospace" color="black" >1710</fo:block></fo:list-item-label>
<fo:list-item-body start-indent="30pt"><fo:block font-size="6pt" font-family="monospace" color="black" text-indent="5pt" font-weight="normal">  cae cae</fo:block></fo:list-item-body></fo:list-item>
<fo:list-item><fo:list-item-label><fo:block font-size="6pt" font-family="monospace" color="black" >2554</fo:block></fo:list-item-label>
<fo:list-item-body start-indent="30pt"><fo:block font-size="6pt" font-family="monospace" color="black" text-indent="5pt" font-weight="normal">  cae vos</fo:block></fo:list-item-body></fo:list-item>
<fo:list-item><fo:list-item-label><fo:block font-size="6pt" font-family="monospace" color="black" >1709</fo:block></fo:list-item-label>
<fo:list-item-body start-indent="30pt"><fo:block font-size="6pt" font-family="monospace" color="black" text-indent="5pt" font-weight="normal">  can</fo:block></fo:list-item-body></fo:list-item>
<fo:list-item><fo:list-item-label><fo:block font-size="6pt" font-family="monospace" color="black" >1708</fo:block></fo:list-item-label>
<fo:list-item-body start-indent="30pt"><fo:block font-size="6pt" font-family="monospace" color="black" text-indent="5pt" font-weight="normal">  *can</fo:block></fo:list-item-body></fo:list-item>
<fo:list-item><fo:list-item-label><fo:block font-size="6pt" font-family="monospace" color="black" >1723</fo:block></fo:list-item-label>
<fo:list-item-body start-indent="30pt"><fo:block font-size="6pt" font-family="monospace" color="black" text-indent="5pt" font-weight="normal">  mol</fo:block></fo:list-item-body></fo:list-item>
<fo:list-item><fo:list-item-label><fo:block font-size="6pt" font-family="monospace" color="black" >1722</fo:block></fo:list-item-label>
<fo:list-item-body start-indent="30pt"><fo:block font-size="6pt" font-family="monospace" color="black" text-indent="5pt" font-weight="normal">  *mol</fo:block></fo:list-item-body></fo:list-item>
<fo:list-item><fo:list-item-label><fo:block font-size="6pt" font-family="monospace" color="black" >1716</fo:block></fo:list-item-label>
<fo:list-item-body start-indent="30pt"><fo:block font-size="6pt" font-family="monospace" color="black" text-indent="5pt" font-weight="normal">  rug</fo:block></fo:list-item-body></fo:list-item>
<fo:list-item><fo:list-item-label><fo:block font-size="6pt" font-family="monospace" color="black" >1718</fo:block></fo:list-item-label>
<fo:list-item-body start-indent="30pt"><fo:block font-size="6pt" font-family="monospace" color="black" text-indent="5pt" font-weight="normal">  she</fo:block></fo:list-item-body></fo:list-item>
<fo:list-item><fo:list-item-label><fo:block font-size="6pt" font-family="monospace" color="black" >1719</fo:block></fo:list-item-label>
<fo:list-item-body start-indent="30pt"><fo:block font-size="6pt" font-family="monospace" color="black" text-indent="5pt" font-weight="normal">  spi</fo:block></fo:list-item-body></fo:list-item>
<fo:list-item><fo:list-item-label><fo:block font-size="6pt" font-family="monospace" color="black" >7888</fo:block></fo:list-item-label>
<fo:list-item-body start-indent="30pt"><fo:block font-size="6pt" font-family="monospace" color="black" text-indent="5pt" font-weight="normal">  x duma</fo:block></fo:list-item-body></fo:list-item>
<fo:list-item><fo:list-item-label><fo:block font-size="6pt" font-family="monospace" color="black" >1726</fo:block></fo:list-item-label>
<fo:list-item-body start-indent="30pt"><fo:block font-size="6pt" font-family="monospace" color="black" font-weight="normal">Rubus caesi</fo:block></fo:list-item-body></fo:list-item>
<fo:list-item><fo:list-item-label><fo:block font-size="6pt" font-family="monospace" color="black" >3395</fo:block></fo:list-item-label>
<fo:list-item-body start-indent="30pt"><fo:block font-size="6pt" font-family="monospace" color="black" text-indent="5pt" font-weight="normal">  das</fo:block></fo:list-item-body></fo:list-item>
<fo:list-item><fo:list-item-label><fo:block font-size="6pt" font-family="monospace" color="black" >3409</fo:block></fo:list-item-label>
<fo:list-item-body start-indent="30pt"><fo:block font-size="6pt" font-family="monospace" color="black" text-indent="5pt" font-weight="normal">  ebor</fo:block></fo:list-item-body></fo:list-item>
<fo:list-item><fo:list-item-label><fo:block font-size="6pt" font-family="monospace" color="black" >1728</fo:block></fo:list-item-label>
<fo:list-item-body start-indent="30pt"><fo:block font-size="6pt" font-family="monospace" color="black" text-indent="5pt" font-weight="normal">  *fru</fo:block></fo:list-item-body></fo:list-item>
<fo:list-item><fo:list-item-label><fo:block font-size="6pt" font-family="monospace" color="black" >1729</fo:block></fo:list-item-label>
<fo:list-item-body start-indent="30pt"><fo:block font-size="6pt" font-family="monospace" color="black" text-indent="5pt" font-weight="normal">  ida</fo:block></fo:list-item-body></fo:list-item>
<fo:list-item><fo:list-item-label><fo:block font-size="6pt" font-family="monospace" color="black" >1734</fo:block></fo:list-item-label>
<fo:list-item-body start-indent="30pt"><fo:block font-size="6pt" font-family="monospace" color="black" font-weight="normal">Rumex acetosa</fo:block></fo:list-item-body></fo:list-item>
<fo:list-item><fo:list-item-label><fo:block font-size="6pt" font-family="monospace" color="black" >1735</fo:block></fo:list-item-label>
<fo:list-item-body start-indent="30pt"><fo:block font-size="6pt" font-family="monospace" color="black" text-indent="5pt" font-weight="normal">  acetosell</fo:block></fo:list-item-body></fo:list-item>
<fo:list-item><fo:list-item-label><fo:block font-size="6pt" font-family="monospace" color="black" >1741</fo:block></fo:list-item-label>
<fo:list-item-body start-indent="30pt"><fo:block font-size="6pt" font-family="monospace" color="black" text-indent="5pt" font-weight="normal">  conglo</fo:block></fo:list-item-body></fo:list-item>
<fo:list-item><fo:list-item-label><fo:block font-size="6pt" font-family="monospace" color="black" >1742</fo:block></fo:list-item-label>
<fo:list-item-body start-indent="30pt"><fo:block font-size="6pt" font-family="monospace" color="black" text-indent="5pt" font-weight="normal">  crisp</fo:block></fo:list-item-body></fo:list-item>
<fo:list-item><fo:list-item-label><fo:block font-size="6pt" font-family="monospace" color="black" >1748</fo:block></fo:list-item-label>
<fo:list-item-body start-indent="30pt"><fo:block font-size="6pt" font-family="monospace" color="black" text-indent="5pt" font-weight="normal">  obt</fo:block></fo:list-item-body></fo:list-item>
<fo:list-item><fo:list-item-label><fo:block font-size="6pt" font-family="monospace" color="black" >1753</fo:block></fo:list-item-label>
<fo:list-item-body start-indent="30pt"><fo:block font-size="6pt" font-family="monospace" color="black" text-indent="5pt" font-weight="normal">  san</fo:block></fo:list-item-body></fo:list-item>
<fo:list-item><fo:list-item-label><fo:block font-size="6pt" font-family="monospace" color="black" >1766</fo:block></fo:list-item-label>
<fo:list-item-body start-indent="30pt"><fo:block font-size="6pt" font-family="monospace" color="black" font-weight="normal">Sagin nod</fo:block></fo:list-item-body></fo:list-item>
<fo:list-item><fo:list-item-label><fo:block font-size="6pt" font-family="monospace" color="black" >1767</fo:block></fo:list-item-label>
<fo:list-item-body start-indent="30pt"><fo:block font-size="6pt" font-family="monospace" color="black" text-indent="5pt" font-weight="normal">  pro</fo:block></fo:list-item-body></fo:list-item>
<fo:list-item><fo:list-item-label><fo:block font-size="6pt" font-family="monospace" color="black" >1784</fo:block></fo:list-item-label>
<fo:list-item-body start-indent="30pt"><fo:block font-size="6pt" font-family="monospace" color="black" font-weight="normal">Salix alb</fo:block></fo:list-item-body></fo:list-item>
<fo:list-item><fo:list-item-label><fo:block font-size="6pt" font-family="monospace" color="black" >1787</fo:block></fo:list-item-label>
<fo:list-item-body start-indent="30pt"><fo:block font-size="6pt" font-family="monospace" color="black" text-indent="5pt" font-weight="normal">  aur</fo:block></fo:list-item-body></fo:list-item>
<fo:list-item><fo:list-item-label><fo:block font-size="6pt" font-family="monospace" color="black" >1788</fo:block></fo:list-item-label>
<fo:list-item-body start-indent="30pt"><fo:block font-size="6pt" font-family="monospace" color="black" text-indent="5pt" font-weight="normal">  cap</fo:block></fo:list-item-body></fo:list-item>
<fo:list-item><fo:list-item-label><fo:block font-size="6pt" font-family="monospace" color="black" >1789</fo:block></fo:list-item-label>
<fo:list-item-body start-indent="30pt"><fo:block font-size="6pt" font-family="monospace" color="black" text-indent="5pt" font-weight="normal">  cin</fo:block></fo:list-item-body></fo:list-item>
<fo:list-item><fo:list-item-label><fo:block font-size="6pt" font-family="monospace" color="black" >1786</fo:block></fo:list-item-label>
<fo:list-item-body start-indent="30pt"><fo:block font-size="6pt" font-family="monospace" color="black" text-indent="5pt" font-weight="normal">  cin ole</fo:block></fo:list-item-body></fo:list-item>
<fo:list-item><fo:list-item-label><fo:block font-size="6pt" font-family="monospace" color="black" >1793</fo:block></fo:list-item-label>
<fo:list-item-body start-indent="30pt"><fo:block font-size="6pt" font-family="monospace" color="black" text-indent="5pt" font-weight="normal">  fra</fo:block></fo:list-item-body></fo:list-item>
<fo:list-item><fo:list-item-label><fo:block font-size="6pt" font-family="monospace" color="black" >1799</fo:block></fo:list-item-label>
<fo:list-item-body start-indent="30pt"><fo:block font-size="6pt" font-family="monospace" color="black" text-indent="5pt" font-weight="normal">  pen</fo:block></fo:list-item-body></fo:list-item>
<fo:list-item><fo:list-item-label><fo:block font-size="6pt" font-family="monospace" color="black" >1800</fo:block></fo:list-item-label>
<fo:list-item-body start-indent="30pt"><fo:block font-size="6pt" font-family="monospace" color="black" text-indent="5pt" font-weight="normal">  phy</fo:block></fo:list-item-body></fo:list-item>
<fo:list-item><fo:list-item-label><fo:block font-size="6pt" font-family="monospace" color="black" >1801</fo:block></fo:list-item-label>
<fo:list-item-body start-indent="30pt"><fo:block font-size="6pt" font-family="monospace" color="black" text-indent="5pt" font-weight="normal">  pur</fo:block></fo:list-item-body></fo:list-item>
<fo:list-item><fo:list-item-label><fo:block font-size="6pt" font-family="monospace" color="black" >1805</fo:block></fo:list-item-label>
<fo:list-item-body start-indent="30pt"><fo:block font-size="6pt" font-family="monospace" color="black" text-indent="5pt" font-weight="normal">  vim</fo:block></fo:list-item-body></fo:list-item>
<fo:list-item><fo:list-item-label><fo:block font-size="6pt" font-family="monospace" color="black" >1815</fo:block></fo:list-item-label>
<fo:list-item-body start-indent="30pt"><fo:block font-size="6pt" font-family="monospace" color="black" font-weight="normal">Sambu nig</fo:block></fo:list-item-body></fo:list-item>
<fo:list-item><fo:list-item-label><fo:block font-size="6pt" font-family="monospace" color="black" >1818</fo:block></fo:list-item-label>
<fo:list-item-body start-indent="30pt"><fo:block font-size="6pt" font-family="monospace" color="black" font-weight="normal">Sangu off</fo:block></fo:list-item-body></fo:list-item>
<fo:list-item><fo:list-item-label><fo:block font-size="6pt" font-family="monospace" color="black" >1819</fo:block></fo:list-item-label>
<fo:list-item-body start-indent="30pt"><fo:block font-size="6pt" font-family="monospace" color="black" font-weight="normal">Sanic eur</fo:block></fo:list-item-body></fo:list-item>
<fo:list-item><fo:list-item-label><fo:block font-size="6pt" font-family="monospace" color="black" >1846</fo:block></fo:list-item-label>
<fo:list-item-body start-indent="30pt"><fo:block font-size="6pt" font-family="monospace" color="black" font-weight="normal">Scabi col</fo:block></fo:list-item-body></fo:list-item>
<fo:list-item><fo:list-item-label><fo:block font-size="6pt" font-family="monospace" color="black" >813</fo:block></fo:list-item-label>
<fo:list-item-body start-indent="30pt"><fo:block font-size="6pt" font-family="monospace" color="black" font-weight="normal">Sched aru</fo:block></fo:list-item-body></fo:list-item>
<fo:list-item><fo:list-item-label><fo:block font-size="6pt" font-family="monospace" color="black" >816</fo:block></fo:list-item-label>
<fo:list-item-body start-indent="30pt"><fo:block font-size="6pt" font-family="monospace" color="black" text-indent="5pt" font-weight="normal">  gig</fo:block></fo:list-item-body></fo:list-item>
<fo:list-item><fo:list-item-label><fo:block font-size="6pt" font-family="monospace" color="black" >823</fo:block></fo:list-item-label>
<fo:list-item-body start-indent="30pt"><fo:block font-size="6pt" font-family="monospace" color="black" text-indent="5pt" font-weight="normal">  pra</fo:block></fo:list-item-body></fo:list-item>
<fo:list-item><fo:list-item-label><fo:block font-size="6pt" font-family="monospace" color="black" >1851</fo:block></fo:list-item-label>
<fo:list-item-body start-indent="30pt"><fo:block font-size="6pt" font-family="monospace" color="black" font-weight="normal">Schoe lac</fo:block></fo:list-item-body></fo:list-item>
<fo:list-item><fo:list-item-label><fo:block font-size="6pt" font-family="monospace" color="black" >1852</fo:block></fo:list-item-label>
<fo:list-item-body start-indent="30pt"><fo:block font-size="6pt" font-family="monospace" color="black" text-indent="5pt" font-weight="normal">  tab</fo:block></fo:list-item-body></fo:list-item>
<fo:list-item><fo:list-item-label><fo:block font-size="6pt" font-family="monospace" color="black" >1129</fo:block></fo:list-item-label>
<fo:list-item-body start-indent="30pt"><fo:block font-size="6pt" font-family="monospace" color="black" font-weight="normal">Scorz aut</fo:block></fo:list-item-body></fo:list-item>
<fo:list-item><fo:list-item-label><fo:block font-size="6pt" font-family="monospace" color="black" >1865</fo:block></fo:list-item-label>
<fo:list-item-body start-indent="30pt"><fo:block font-size="6pt" font-family="monospace" color="black" font-weight="normal">Scrop aur</fo:block></fo:list-item-body></fo:list-item>
<fo:list-item><fo:list-item-label><fo:block font-size="6pt" font-family="monospace" color="black" >1867</fo:block></fo:list-item-label>
<fo:list-item-body start-indent="30pt"><fo:block font-size="6pt" font-family="monospace" color="black" text-indent="5pt" font-weight="normal">  nod</fo:block></fo:list-item-body></fo:list-item>
<fo:list-item><fo:list-item-label><fo:block font-size="6pt" font-family="monospace" color="black" >1875</fo:block></fo:list-item-label>
<fo:list-item-body start-indent="30pt"><fo:block font-size="6pt" font-family="monospace" color="black" font-weight="normal">Sedum acr</fo:block></fo:list-item-body></fo:list-item>
<fo:list-item><fo:list-item-label><fo:block font-size="6pt" font-family="monospace" color="black" >1876</fo:block></fo:list-item-label>
<fo:list-item-body start-indent="30pt"><fo:block font-size="6pt" font-family="monospace" color="black" text-indent="5pt" font-weight="normal">  alb</fo:block></fo:list-item-body></fo:list-item>
<fo:list-item><fo:list-item-label><fo:block font-size="6pt" font-family="monospace" color="black" >1891</fo:block></fo:list-item-label>
<fo:list-item-body start-indent="30pt"><fo:block font-size="6pt" font-family="monospace" color="black" font-weight="normal">Senec aqu</fo:block></fo:list-item-body></fo:list-item>
<fo:list-item><fo:list-item-label><fo:block font-size="6pt" font-family="monospace" color="black" >1896</fo:block></fo:list-item-label>
<fo:list-item-body start-indent="30pt"><fo:block font-size="6pt" font-family="monospace" color="black" text-indent="5pt" font-weight="normal">  eru</fo:block></fo:list-item-body></fo:list-item>
<fo:list-item><fo:list-item-label><fo:block font-size="6pt" font-family="monospace" color="black" >1899</fo:block></fo:list-item-label>
<fo:list-item-body start-indent="30pt"><fo:block font-size="6pt" font-family="monospace" color="black" text-indent="5pt" font-weight="normal">  jac</fo:block></fo:list-item-body></fo:list-item>
<fo:list-item><fo:list-item-label><fo:block font-size="6pt" font-family="monospace" color="black" >1902</fo:block></fo:list-item-label>
<fo:list-item-body start-indent="30pt"><fo:block font-size="6pt" font-family="monospace" color="black" text-indent="5pt" font-weight="normal">  squ</fo:block></fo:list-item-body></fo:list-item>
<fo:list-item><fo:list-item-label><fo:block font-size="6pt" font-family="monospace" color="black" >1903</fo:block></fo:list-item-label>
<fo:list-item-body start-indent="30pt"><fo:block font-size="6pt" font-family="monospace" color="black" text-indent="5pt" font-weight="normal">  syl</fo:block></fo:list-item-body></fo:list-item>
<fo:list-item><fo:list-item-label><fo:block font-size="6pt" font-family="monospace" color="black" >1904</fo:block></fo:list-item-label>
<fo:list-item-body start-indent="30pt"><fo:block font-size="6pt" font-family="monospace" color="black" text-indent="5pt" font-weight="normal">  vis</fo:block></fo:list-item-body></fo:list-item>
<fo:list-item><fo:list-item-label><fo:block font-size="6pt" font-family="monospace" color="black" >1905</fo:block></fo:list-item-label>
<fo:list-item-body start-indent="30pt"><fo:block font-size="6pt" font-family="monospace" color="black" text-indent="5pt" font-weight="normal">  vul</fo:block></fo:list-item-body></fo:list-item>
<fo:list-item><fo:list-item-label><fo:block font-size="6pt" font-family="monospace" color="black" >1908</fo:block></fo:list-item-label>
<fo:list-item-body start-indent="30pt"><fo:block font-size="6pt" font-family="monospace" color="black" font-weight="normal">Sesle cae</fo:block></fo:list-item-body></fo:list-item>
<fo:list-item><fo:list-item-label><fo:block font-size="6pt" font-family="monospace" color="black" >1916</fo:block></fo:list-item-label>
<fo:list-item-body start-indent="30pt"><fo:block font-size="6pt" font-family="monospace" color="black" font-weight="normal">Silau sil</fo:block></fo:list-item-body></fo:list-item>
<fo:list-item><fo:list-item-label><fo:block font-size="6pt" font-family="monospace" color="black" >1259</fo:block></fo:list-item-label>
<fo:list-item-body start-indent="30pt"><fo:block font-size="6pt" font-family="monospace" color="black" font-weight="normal">Silen dio</fo:block></fo:list-item-body></fo:list-item>
<fo:list-item><fo:list-item-label><fo:block font-size="6pt" font-family="monospace" color="black" >1210</fo:block></fo:list-item-label>
<fo:list-item-body start-indent="30pt"><fo:block font-size="6pt" font-family="monospace" color="black" text-indent="5pt" font-weight="normal">  flo</fo:block></fo:list-item-body></fo:list-item>
<fo:list-item><fo:list-item-label><fo:block font-size="6pt" font-family="monospace" color="black" >1258</fo:block></fo:list-item-label>
<fo:list-item-body start-indent="30pt"><fo:block font-size="6pt" font-family="monospace" color="black" text-indent="5pt" font-weight="normal">  lat</fo:block></fo:list-item-body></fo:list-item>
<fo:list-item><fo:list-item-label><fo:block font-size="6pt" font-family="monospace" color="black" >4578</fo:block></fo:list-item-label>
<fo:list-item-body start-indent="30pt"><fo:block font-size="6pt" font-family="monospace" color="black" text-indent="5pt" font-weight="normal">  vul</fo:block></fo:list-item-body></fo:list-item>
<fo:list-item><fo:list-item-label><fo:block font-size="6pt" font-family="monospace" color="black" >1260</fo:block></fo:list-item-label>
<fo:list-item-body start-indent="30pt"><fo:block font-size="6pt" font-family="monospace" color="black" text-indent="5pt" font-weight="normal">  x ham</fo:block></fo:list-item-body></fo:list-item>
<fo:list-item><fo:list-item-label><fo:block font-size="6pt" font-family="monospace" color="black" >1933</fo:block></fo:list-item-label>
<fo:list-item-body start-indent="30pt"><fo:block font-size="6pt" font-family="monospace" color="black" font-weight="normal">Sinap arv</fo:block></fo:list-item-body></fo:list-item>
<fo:list-item><fo:list-item-label><fo:block font-size="6pt" font-family="monospace" color="black" >1938</fo:block></fo:list-item-label>
<fo:list-item-body start-indent="30pt"><fo:block font-size="6pt" font-family="monospace" color="black" font-weight="normal">Sisym off</fo:block></fo:list-item-body></fo:list-item>
<fo:list-item><fo:list-item-label><fo:block font-size="6pt" font-family="monospace" color="black" >1947</fo:block></fo:list-item-label>
<fo:list-item-body start-indent="30pt"><fo:block font-size="6pt" font-family="monospace" color="black" font-weight="normal">Solan dul</fo:block></fo:list-item-body></fo:list-item>
<fo:list-item><fo:list-item-label><fo:block font-size="6pt" font-family="monospace" color="black" >2251</fo:block></fo:list-item-label>
<fo:list-item-body start-indent="30pt"><fo:block font-size="6pt" font-family="monospace" color="black" font-weight="normal">Solid can</fo:block></fo:list-item-body></fo:list-item>
<fo:list-item><fo:list-item-label><fo:block font-size="6pt" font-family="monospace" color="black" >2434</fo:block></fo:list-item-label>
<fo:list-item-body start-indent="30pt"><fo:block font-size="6pt" font-family="monospace" color="black" text-indent="5pt" font-weight="normal">  gig</fo:block></fo:list-item-body></fo:list-item>
<fo:list-item><fo:list-item-label><fo:block font-size="6pt" font-family="monospace" color="black" >1951</fo:block></fo:list-item-label>
<fo:list-item-body start-indent="30pt"><fo:block font-size="6pt" font-family="monospace" color="black" text-indent="5pt" font-weight="normal">  vir</fo:block></fo:list-item-body></fo:list-item>
<fo:list-item><fo:list-item-label><fo:block font-size="6pt" font-family="monospace" color="black" >1952</fo:block></fo:list-item-label>
<fo:list-item-body start-indent="30pt"><fo:block font-size="6pt" font-family="monospace" color="black" font-weight="normal">Sonch arv</fo:block></fo:list-item-body></fo:list-item>
<fo:list-item><fo:list-item-label><fo:block font-size="6pt" font-family="monospace" color="black" >1953</fo:block></fo:list-item-label>
<fo:list-item-body start-indent="30pt"><fo:block font-size="6pt" font-family="monospace" color="black" text-indent="5pt" font-weight="normal">  asp</fo:block></fo:list-item-body></fo:list-item>
<fo:list-item><fo:list-item-label><fo:block font-size="6pt" font-family="monospace" color="black" >1954</fo:block></fo:list-item-label>
<fo:list-item-body start-indent="30pt"><fo:block font-size="6pt" font-family="monospace" color="black" text-indent="5pt" font-weight="normal">  ole</fo:block></fo:list-item-body></fo:list-item>
<fo:list-item><fo:list-item-label><fo:block font-size="6pt" font-family="monospace" color="black" >1958</fo:block></fo:list-item-label>
<fo:list-item-body start-indent="30pt"><fo:block font-size="6pt" font-family="monospace" color="black" font-weight="normal">Sorbu ari</fo:block></fo:list-item-body></fo:list-item>
<fo:list-item><fo:list-item-label><fo:block font-size="6pt" font-family="monospace" color="black" >1957</fo:block></fo:list-item-label>
<fo:list-item-body start-indent="30pt"><fo:block font-size="6pt" font-family="monospace" color="black" text-indent="5pt" font-weight="normal">  *ari</fo:block></fo:list-item-body></fo:list-item>
<fo:list-item><fo:list-item-label><fo:block font-size="6pt" font-family="monospace" color="black" >1960</fo:block></fo:list-item-label>
<fo:list-item-body start-indent="30pt"><fo:block font-size="6pt" font-family="monospace" color="black" text-indent="5pt" font-weight="normal">  auc</fo:block></fo:list-item-body></fo:list-item>
<fo:list-item><fo:list-item-label><fo:block font-size="6pt" font-family="monospace" color="black" >1966</fo:block></fo:list-item-label>
<fo:list-item-body start-indent="30pt"><fo:block font-size="6pt" font-family="monospace" color="black" text-indent="5pt" font-weight="normal">  int</fo:block></fo:list-item-body></fo:list-item>
<fo:list-item><fo:list-item-label><fo:block font-size="6pt" font-family="monospace" color="black" >5483</fo:block></fo:list-item-label>
<fo:list-item-body start-indent="30pt"><fo:block font-size="6pt" font-family="monospace" color="black" text-indent="5pt" font-weight="normal">  *int</fo:block></fo:list-item-body></fo:list-item>
<fo:list-item><fo:list-item-label><fo:block font-size="6pt" font-family="monospace" color="black" >1981</fo:block></fo:list-item-label>
<fo:list-item-body start-indent="30pt"><fo:block font-size="6pt" font-family="monospace" color="black" font-weight="normal">Sparg ere</fo:block></fo:list-item-body></fo:list-item>
<fo:list-item><fo:list-item-label><fo:block font-size="6pt" font-family="monospace" color="black" >1990</fo:block></fo:list-item-label>
<fo:list-item-body start-indent="30pt"><fo:block font-size="6pt" font-family="monospace" color="black" font-weight="normal">Sperg mar</fo:block></fo:list-item-body></fo:list-item>
<fo:list-item><fo:list-item-label><fo:block font-size="6pt" font-family="monospace" color="black" >2003</fo:block></fo:list-item-label>
<fo:list-item-body start-indent="30pt"><fo:block font-size="6pt" font-family="monospace" color="black" font-weight="normal">Stach pal</fo:block></fo:list-item-body></fo:list-item>
<fo:list-item><fo:list-item-label><fo:block font-size="6pt" font-family="monospace" color="black" >2005</fo:block></fo:list-item-label>
<fo:list-item-body start-indent="30pt"><fo:block font-size="6pt" font-family="monospace" color="black" text-indent="5pt" font-weight="normal">  syl</fo:block></fo:list-item-body></fo:list-item>
<fo:list-item><fo:list-item-label><fo:block font-size="6pt" font-family="monospace" color="black" >2007</fo:block></fo:list-item-label>
<fo:list-item-body start-indent="30pt"><fo:block font-size="6pt" font-family="monospace" color="black" font-weight="normal">Stell als</fo:block></fo:list-item-body></fo:list-item>
<fo:list-item><fo:list-item-label><fo:block font-size="6pt" font-family="monospace" color="black" >2009</fo:block></fo:list-item-label>
<fo:list-item-body start-indent="30pt"><fo:block font-size="6pt" font-family="monospace" color="black" text-indent="5pt" font-weight="normal">  gra</fo:block></fo:list-item-body></fo:list-item>
<fo:list-item><fo:list-item-label><fo:block font-size="6pt" font-family="monospace" color="black" >2010</fo:block></fo:list-item-label>
<fo:list-item-body start-indent="30pt"><fo:block font-size="6pt" font-family="monospace" color="black" text-indent="5pt" font-weight="normal">  hol</fo:block></fo:list-item-body></fo:list-item>
<fo:list-item><fo:list-item-label><fo:block font-size="6pt" font-family="monospace" color="black" >2012</fo:block></fo:list-item-label>
<fo:list-item-body start-indent="30pt"><fo:block font-size="6pt" font-family="monospace" color="black" text-indent="5pt" font-weight="normal">  med</fo:block></fo:list-item-body></fo:list-item>
<fo:list-item><fo:list-item-label><fo:block font-size="6pt" font-family="monospace" color="black" >2014</fo:block></fo:list-item-label>
<fo:list-item-body start-indent="30pt"><fo:block font-size="6pt" font-family="monospace" color="black" text-indent="5pt" font-weight="normal">  nem</fo:block></fo:list-item-body></fo:list-item>
<fo:list-item><fo:list-item-label><fo:block font-size="6pt" font-family="monospace" color="black" >2021</fo:block></fo:list-item-label>
<fo:list-item-body start-indent="30pt"><fo:block font-size="6pt" font-family="monospace" color="black" font-weight="normal">Succi pra</fo:block></fo:list-item-body></fo:list-item>
<fo:list-item><fo:list-item-label><fo:block font-size="6pt" font-family="monospace" color="black" >2022</fo:block></fo:list-item-label>
<fo:list-item-body start-indent="30pt"><fo:block font-size="6pt" font-family="monospace" color="black" font-weight="normal">Symph alb</fo:block></fo:list-item-body></fo:list-item>
<fo:list-item><fo:list-item-label><fo:block font-size="6pt" font-family="monospace" color="black" >2024</fo:block></fo:list-item-label>
<fo:list-item-body start-indent="30pt"><fo:block font-size="6pt" font-family="monospace" color="black" font-weight="normal">Symph off</fo:block></fo:list-item-body></fo:list-item>
<fo:list-item><fo:list-item-label><fo:block font-size="6pt" font-family="monospace" color="black" >2025</fo:block></fo:list-item-label>
<fo:list-item-body start-indent="30pt"><fo:block font-size="6pt" font-family="monospace" color="black" text-indent="5pt" font-weight="normal">  x upl</fo:block></fo:list-item-body></fo:list-item>
<fo:list-item><fo:list-item-label><fo:block font-size="6pt" font-family="monospace" color="black" >2029</fo:block></fo:list-item-label>
<fo:list-item-body start-indent="30pt"><fo:block font-size="6pt" font-family="monospace" color="black" font-weight="normal">Syrin vul</fo:block></fo:list-item-body></fo:list-item>
<fo:list-item><fo:list-item-label><fo:block font-size="6pt" font-family="monospace" color="black" >2032</fo:block></fo:list-item-label>
<fo:list-item-body start-indent="30pt"><fo:block font-size="6pt" font-family="monospace" color="black" font-weight="normal">Tamus com</fo:block></fo:list-item-body></fo:list-item>
<fo:list-item><fo:list-item-label><fo:block font-size="6pt" font-family="monospace" color="black" >503</fo:block></fo:list-item-label>
<fo:list-item-body start-indent="30pt"><fo:block font-size="6pt" font-family="monospace" color="black" font-weight="normal">Tanac par</fo:block></fo:list-item-body></fo:list-item>
<fo:list-item><fo:list-item-label><fo:block font-size="6pt" font-family="monospace" color="black" >2033</fo:block></fo:list-item-label>
<fo:list-item-body start-indent="30pt"><fo:block font-size="6pt" font-family="monospace" color="black" text-indent="5pt" font-weight="normal">  vul</fo:block></fo:list-item-body></fo:list-item>
<fo:list-item><fo:list-item-label><fo:block font-size="6pt" font-family="monospace" color="black" >2034</fo:block></fo:list-item-label>
<fo:list-item-body start-indent="30pt"><fo:block font-size="6pt" font-family="monospace" color="black" font-weight="normal">Tarax*agg</fo:block></fo:list-item-body></fo:list-item>
<fo:list-item><fo:list-item-label><fo:block font-size="6pt" font-family="monospace" color="black" >2039</fo:block></fo:list-item-label>
<fo:list-item-body start-indent="30pt"><fo:block font-size="6pt" font-family="monospace" color="black" font-weight="normal">Taxus bac</fo:block></fo:list-item-body></fo:list-item>
<fo:list-item><fo:list-item-label><fo:block font-size="6pt" font-family="monospace" color="black" >2046</fo:block></fo:list-item-label>
<fo:list-item-body start-indent="30pt"><fo:block font-size="6pt" font-family="monospace" color="black" font-weight="normal">Teucr scoro</fo:block></fo:list-item-body></fo:list-item>
<fo:list-item><fo:list-item-label><fo:block font-size="6pt" font-family="monospace" color="black" >2058</fo:block></fo:list-item-label>
<fo:list-item-body start-indent="30pt"><fo:block font-size="6pt" font-family="monospace" color="black" font-weight="normal">Thlas arv</fo:block></fo:list-item-body></fo:list-item>
<fo:list-item><fo:list-item-label><fo:block font-size="6pt" font-family="monospace" color="black" >2060</fo:block></fo:list-item-label>
<fo:list-item-body start-indent="30pt"><fo:block font-size="6pt" font-family="monospace" color="black" font-weight="normal">Thymu pol</fo:block></fo:list-item-body></fo:list-item>
<fo:list-item><fo:list-item-label><fo:block font-size="6pt" font-family="monospace" color="black" >2063</fo:block></fo:list-item-label>
<fo:list-item-body start-indent="30pt"><fo:block font-size="6pt" font-family="monospace" color="black" font-weight="normal">Tilia cor</fo:block></fo:list-item-body></fo:list-item>
<fo:list-item><fo:list-item-label><fo:block font-size="6pt" font-family="monospace" color="black" >2064</fo:block></fo:list-item-label>
<fo:list-item-body start-indent="30pt"><fo:block font-size="6pt" font-family="monospace" color="black" text-indent="5pt" font-weight="normal">  pla</fo:block></fo:list-item-body></fo:list-item>
<fo:list-item><fo:list-item-label><fo:block font-size="6pt" font-family="monospace" color="black" >2065</fo:block></fo:list-item-label>
<fo:list-item-body start-indent="30pt"><fo:block font-size="6pt" font-family="monospace" color="black" text-indent="5pt" font-weight="normal">  x euro</fo:block></fo:list-item-body></fo:list-item>
<fo:list-item><fo:list-item-label><fo:block font-size="6pt" font-family="monospace" color="black" >2069</fo:block></fo:list-item-label>
<fo:list-item-body start-indent="30pt"><fo:block font-size="6pt" font-family="monospace" color="black" font-weight="normal">Toril jap</fo:block></fo:list-item-body></fo:list-item>
<fo:list-item><fo:list-item-label><fo:block font-size="6pt" font-family="monospace" color="black" >2074</fo:block></fo:list-item-label>
<fo:list-item-body start-indent="30pt"><fo:block font-size="6pt" font-family="monospace" color="black" font-weight="normal">Trago pra</fo:block></fo:list-item-body></fo:list-item>
<fo:list-item><fo:list-item-label><fo:block font-size="6pt" font-family="monospace" color="black" >2080</fo:block></fo:list-item-label>
<fo:list-item-body start-indent="30pt"><fo:block font-size="6pt" font-family="monospace" color="black" font-weight="normal">Trifo cam</fo:block></fo:list-item-body></fo:list-item>
<fo:list-item><fo:list-item-label><fo:block font-size="6pt" font-family="monospace" color="black" >2081</fo:block></fo:list-item-label>
<fo:list-item-body start-indent="30pt"><fo:block font-size="6pt" font-family="monospace" color="black" text-indent="5pt" font-weight="normal">  dub</fo:block></fo:list-item-body></fo:list-item>
<fo:list-item><fo:list-item-label><fo:block font-size="6pt" font-family="monospace" color="black" >5459</fo:block></fo:list-item-label>
<fo:list-item-body start-indent="30pt"><fo:block font-size="6pt" font-family="monospace" color="black" text-indent="5pt" font-weight="normal">  hyb</fo:block></fo:list-item-body></fo:list-item>
<fo:list-item><fo:list-item-label><fo:block font-size="6pt" font-family="monospace" color="black" >2087</fo:block></fo:list-item-label>
<fo:list-item-body start-indent="30pt"><fo:block font-size="6pt" font-family="monospace" color="black" text-indent="5pt" font-weight="normal">  med</fo:block></fo:list-item-body></fo:list-item>
<fo:list-item><fo:list-item-label><fo:block font-size="6pt" font-family="monospace" color="black" >2091</fo:block></fo:list-item-label>
<fo:list-item-body start-indent="30pt"><fo:block font-size="6pt" font-family="monospace" color="black" text-indent="5pt" font-weight="normal">  pra</fo:block></fo:list-item-body></fo:list-item>
<fo:list-item><fo:list-item-label><fo:block font-size="6pt" font-family="monospace" color="black" >2092</fo:block></fo:list-item-label>
<fo:list-item-body start-indent="30pt"><fo:block font-size="6pt" font-family="monospace" color="black" text-indent="5pt" font-weight="normal">  rep</fo:block></fo:list-item-body></fo:list-item>
<fo:list-item><fo:list-item-label><fo:block font-size="6pt" font-family="monospace" color="black" >2102</fo:block></fo:list-item-label>
<fo:list-item-body start-indent="30pt"><fo:block font-size="6pt" font-family="monospace" color="black" font-weight="normal">Trigl pal</fo:block></fo:list-item-body></fo:list-item>
<fo:list-item><fo:list-item-label><fo:block font-size="6pt" font-family="monospace" color="black" >1241.1</fo:block></fo:list-item-label>
<fo:list-item-body start-indent="30pt"><fo:block font-size="6pt" font-family="monospace" color="black" font-weight="normal">Tripl ino</fo:block></fo:list-item-body></fo:list-item>
<fo:list-item><fo:list-item-label><fo:block font-size="6pt" font-family="monospace" color="black" >1241.3</fo:block></fo:list-item-label>
<fo:list-item-body start-indent="30pt"><fo:block font-size="6pt" font-family="monospace" color="black" text-indent="5pt" font-weight="normal">  mar</fo:block></fo:list-item-body></fo:list-item>
<fo:list-item><fo:list-item-label><fo:block font-size="6pt" font-family="monospace" color="black" >2105</fo:block></fo:list-item-label>
<fo:list-item-body start-indent="30pt"><fo:block font-size="6pt" font-family="monospace" color="black" font-weight="normal">Trise fla</fo:block></fo:list-item-body></fo:list-item>
<fo:list-item><fo:list-item-label><fo:block font-size="6pt" font-family="monospace" color="black" >4367</fo:block></fo:list-item-label>
<fo:list-item-body start-indent="30pt"><fo:block font-size="6pt" font-family="monospace" color="black" font-weight="normal">Triti aes</fo:block></fo:list-item-body></fo:list-item>
<fo:list-item><fo:list-item-label><fo:block font-size="6pt" font-family="monospace" color="black" >2106</fo:block></fo:list-item-label>
<fo:list-item-body start-indent="30pt"><fo:block font-size="6pt" font-family="monospace" color="black" font-weight="normal">Troll eur</fo:block></fo:list-item-body></fo:list-item>
<fo:list-item><fo:list-item-label><fo:block font-size="6pt" font-family="monospace" color="black" >2109</fo:block></fo:list-item-label>
<fo:list-item-body start-indent="30pt"><fo:block font-size="6pt" font-family="monospace" color="black" font-weight="normal">Tussi far</fo:block></fo:list-item-body></fo:list-item>
<fo:list-item><fo:list-item-label><fo:block font-size="6pt" font-family="monospace" color="black" >2111</fo:block></fo:list-item-label>
<fo:list-item-body start-indent="30pt"><fo:block font-size="6pt" font-family="monospace" color="black" font-weight="normal">Typha lat</fo:block></fo:list-item-body></fo:list-item>
<fo:list-item><fo:list-item-label><fo:block font-size="6pt" font-family="monospace" color="black" >2112</fo:block></fo:list-item-label>
<fo:list-item-body start-indent="30pt"><fo:block font-size="6pt" font-family="monospace" color="black" font-weight="normal">Ulex eur</fo:block></fo:list-item-body></fo:list-item>
<fo:list-item><fo:list-item-label><fo:block font-size="6pt" font-family="monospace" color="black" >2119</fo:block></fo:list-item-label>
<fo:list-item-body start-indent="30pt"><fo:block font-size="6pt" font-family="monospace" color="black" font-weight="normal">Ulmus gla</fo:block></fo:list-item-body></fo:list-item>
<fo:list-item><fo:list-item-label><fo:block font-size="6pt" font-family="monospace" color="black" >2122</fo:block></fo:list-item-label>
<fo:list-item-body start-indent="30pt"><fo:block font-size="6pt" font-family="monospace" color="black" text-indent="5pt" font-weight="normal">  proc</fo:block></fo:list-item-body></fo:list-item>
<fo:list-item><fo:list-item-label><fo:block font-size="6pt" font-family="monospace" color="black" >2126</fo:block></fo:list-item-label>
<fo:list-item-body start-indent="30pt"><fo:block font-size="6pt" font-family="monospace" color="black" font-weight="normal">Urtic dio</fo:block></fo:list-item-body></fo:list-item>
<fo:list-item><fo:list-item-label><fo:block font-size="6pt" font-family="monospace" color="black" >2128</fo:block></fo:list-item-label>
<fo:list-item-body start-indent="30pt"><fo:block font-size="6pt" font-family="monospace" color="black" text-indent="5pt" font-weight="normal">  ure</fo:block></fo:list-item-body></fo:list-item>
<fo:list-item><fo:list-item-label><fo:block font-size="6pt" font-family="monospace" color="black" >2136</fo:block></fo:list-item-label>
<fo:list-item-body start-indent="30pt"><fo:block font-size="6pt" font-family="monospace" color="black" font-weight="normal">Vacci myr</fo:block></fo:list-item-body></fo:list-item>
<fo:list-item><fo:list-item-label><fo:block font-size="6pt" font-family="monospace" color="black" >2139</fo:block></fo:list-item-label>
<fo:list-item-body start-indent="30pt"><fo:block font-size="6pt" font-family="monospace" color="black" font-weight="normal">Valer dio</fo:block></fo:list-item-body></fo:list-item>
<fo:list-item><fo:list-item-label><fo:block font-size="6pt" font-family="monospace" color="black" >2140</fo:block></fo:list-item-label>
<fo:list-item-body start-indent="30pt"><fo:block font-size="6pt" font-family="monospace" color="black" text-indent="5pt" font-weight="normal">  off</fo:block></fo:list-item-body></fo:list-item>
<fo:list-item><fo:list-item-label><fo:block font-size="6pt" font-family="monospace" color="black" >2157</fo:block></fo:list-item-label>
<fo:list-item-body start-indent="30pt"><fo:block font-size="6pt" font-family="monospace" color="black" font-weight="normal">Verba tha</fo:block></fo:list-item-body></fo:list-item>
<fo:list-item><fo:list-item-label><fo:block font-size="6pt" font-family="monospace" color="black" >2165</fo:block></fo:list-item-label>
<fo:list-item-body start-indent="30pt"><fo:block font-size="6pt" font-family="monospace" color="black" font-weight="normal">Veron arv</fo:block></fo:list-item-body></fo:list-item>
<fo:list-item><fo:list-item-label><fo:block font-size="6pt" font-family="monospace" color="black" >2166</fo:block></fo:list-item-label>
<fo:list-item-body start-indent="30pt"><fo:block font-size="6pt" font-family="monospace" color="black" text-indent="5pt" font-weight="normal">  bec</fo:block></fo:list-item-body></fo:list-item>
<fo:list-item><fo:list-item-label><fo:block font-size="6pt" font-family="monospace" color="black" >2168</fo:block></fo:list-item-label>
<fo:list-item-body start-indent="30pt"><fo:block font-size="6pt" font-family="monospace" color="black" text-indent="5pt" font-weight="normal">  cha</fo:block></fo:list-item-body></fo:list-item>
<fo:list-item><fo:list-item-label><fo:block font-size="6pt" font-family="monospace" color="black" >2169</fo:block></fo:list-item-label>
<fo:list-item-body start-indent="30pt"><fo:block font-size="6pt" font-family="monospace" color="black" text-indent="5pt" font-weight="normal">  fil</fo:block></fo:list-item-body></fo:list-item>
<fo:list-item><fo:list-item-label><fo:block font-size="6pt" font-family="monospace" color="black" >2171</fo:block></fo:list-item-label>
<fo:list-item-body start-indent="30pt"><fo:block font-size="6pt" font-family="monospace" color="black" text-indent="5pt" font-weight="normal">  hed</fo:block></fo:list-item-body></fo:list-item>
<fo:list-item><fo:list-item-label><fo:block font-size="6pt" font-family="monospace" color="black" >2172</fo:block></fo:list-item-label>
<fo:list-item-body start-indent="30pt"><fo:block font-size="6pt" font-family="monospace" color="black" text-indent="5pt" font-weight="normal">  mon</fo:block></fo:list-item-body></fo:list-item>
<fo:list-item><fo:list-item-label><fo:block font-size="6pt" font-family="monospace" color="black" >2173</fo:block></fo:list-item-label>
<fo:list-item-body start-indent="30pt"><fo:block font-size="6pt" font-family="monospace" color="black" text-indent="5pt" font-weight="normal">  off</fo:block></fo:list-item-body></fo:list-item>
<fo:list-item><fo:list-item-label><fo:block font-size="6pt" font-family="monospace" color="black" >2175</fo:block></fo:list-item-label>
<fo:list-item-body start-indent="30pt"><fo:block font-size="6pt" font-family="monospace" color="black" text-indent="5pt" font-weight="normal">  pers</fo:block></fo:list-item-body></fo:list-item>
<fo:list-item><fo:list-item-label><fo:block font-size="6pt" font-family="monospace" color="black" >2179</fo:block></fo:list-item-label>
<fo:list-item-body start-indent="30pt"><fo:block font-size="6pt" font-family="monospace" color="black" text-indent="5pt" font-weight="normal">  scu</fo:block></fo:list-item-body></fo:list-item>
<fo:list-item><fo:list-item-label><fo:block font-size="6pt" font-family="monospace" color="black" >2180</fo:block></fo:list-item-label>
<fo:list-item-body start-indent="30pt"><fo:block font-size="6pt" font-family="monospace" color="black" text-indent="5pt" font-weight="normal">  ser</fo:block></fo:list-item-body></fo:list-item>
<fo:list-item><fo:list-item-label><fo:block font-size="6pt" font-family="monospace" color="black" >2180.2</fo:block></fo:list-item-label>
<fo:list-item-body start-indent="30pt"><fo:block font-size="6pt" font-family="monospace" color="black" text-indent="5pt" font-weight="normal">  ser ser</fo:block></fo:list-item-body></fo:list-item>
<fo:list-item><fo:list-item-label><fo:block font-size="6pt" font-family="monospace" color="black" >2185</fo:block></fo:list-item-label>
<fo:list-item-body start-indent="30pt"><fo:block font-size="6pt" font-family="monospace" color="black" font-weight="normal">Vibur opu</fo:block></fo:list-item-body></fo:list-item>
<fo:list-item><fo:list-item-label><fo:block font-size="6pt" font-family="monospace" color="black" >2189</fo:block></fo:list-item-label>
<fo:list-item-body start-indent="30pt"><fo:block font-size="6pt" font-family="monospace" color="black" font-weight="normal">Vicia cra</fo:block></fo:list-item-body></fo:list-item>
<fo:list-item><fo:list-item-label><fo:block font-size="6pt" font-family="monospace" color="black" >2191</fo:block></fo:list-item-label>
<fo:list-item-body start-indent="30pt"><fo:block font-size="6pt" font-family="monospace" color="black" text-indent="5pt" font-weight="normal">  hir</fo:block></fo:list-item-body></fo:list-item>
<fo:list-item><fo:list-item-label><fo:block font-size="6pt" font-family="monospace" color="black" >2516</fo:block></fo:list-item-label>
<fo:list-item-body start-indent="30pt"><fo:block font-size="6pt" font-family="monospace" color="black" text-indent="5pt" font-weight="normal">  sat</fo:block></fo:list-item-body></fo:list-item>
<fo:list-item><fo:list-item-label><fo:block font-size="6pt" font-family="monospace" color="black" >2649</fo:block></fo:list-item-label>
<fo:list-item-body start-indent="30pt"><fo:block font-size="6pt" font-family="monospace" color="black" text-indent="5pt" font-weight="normal">  sat seg</fo:block></fo:list-item-body></fo:list-item>
<fo:list-item><fo:list-item-label><fo:block font-size="6pt" font-family="monospace" color="black" >2198</fo:block></fo:list-item-label>
<fo:list-item-body start-indent="30pt"><fo:block font-size="6pt" font-family="monospace" color="black" text-indent="5pt" font-weight="normal">  sep</fo:block></fo:list-item-body></fo:list-item>
<fo:list-item><fo:list-item-label><fo:block font-size="6pt" font-family="monospace" color="black" >2205</fo:block></fo:list-item-label>
<fo:list-item-body start-indent="30pt"><fo:block font-size="6pt" font-family="monospace" color="black" font-weight="normal">Vinca min</fo:block></fo:list-item-body></fo:list-item>
<fo:list-item><fo:list-item-label><fo:block font-size="6pt" font-family="monospace" color="black" >2206</fo:block></fo:list-item-label>
<fo:list-item-body start-indent="30pt"><fo:block font-size="6pt" font-family="monospace" color="black" font-weight="normal">Viola arv</fo:block></fo:list-item-body></fo:list-item>
<fo:list-item><fo:list-item-label><fo:block font-size="6pt" font-family="monospace" color="black" >2210</fo:block></fo:list-item-label>
<fo:list-item-body start-indent="30pt"><fo:block font-size="6pt" font-family="monospace" color="black" text-indent="5pt" font-weight="normal">  hir</fo:block></fo:list-item-body></fo:list-item>
<fo:list-item><fo:list-item-label><fo:block font-size="6pt" font-family="monospace" color="black" >2212</fo:block></fo:list-item-label>
<fo:list-item-body start-indent="30pt"><fo:block font-size="6pt" font-family="monospace" color="black" text-indent="5pt" font-weight="normal">  lut</fo:block></fo:list-item-body></fo:list-item>
<fo:list-item><fo:list-item-label><fo:block font-size="6pt" font-family="monospace" color="black" >2214</fo:block></fo:list-item-label>
<fo:list-item-body start-indent="30pt"><fo:block font-size="6pt" font-family="monospace" color="black" text-indent="5pt" font-weight="normal">  odo</fo:block></fo:list-item-body></fo:list-item>
<fo:list-item><fo:list-item-label><fo:block font-size="6pt" font-family="monospace" color="black" >2215</fo:block></fo:list-item-label>
<fo:list-item-body start-indent="30pt"><fo:block font-size="6pt" font-family="monospace" color="black" text-indent="5pt" font-weight="normal">  pal</fo:block></fo:list-item-body></fo:list-item>
<fo:list-item><fo:list-item-label><fo:block font-size="6pt" font-family="monospace" color="black" >2218</fo:block></fo:list-item-label>
<fo:list-item-body start-indent="30pt"><fo:block font-size="6pt" font-family="monospace" color="black" text-indent="5pt" font-weight="normal">  riv</fo:block></fo:list-item-body></fo:list-item>
</fo:list-block>
</fo:flow>
</fo:page-sequence>
</fo:root>
